# Supplementary material for: Structure determination of ζ-N2 from single-crystal X-ray diffraction and theoretical suggestion for the formation of amorphous nitrogen
Source: Springer Nature journal article supplement (doi:10.1038/s41467-023-41968-2), 2023-10-05
Supplement: MOESM3 [file 41467_2023_41968_MOESM3_ESM.pdf › 41467_2023_41968_MOESM3_ESM.pdf]

### **Description of Additional Supplementary Files**

**File name: Supplementary Data 1**

Description: Crystallographic Information Files (CIFs) for  $\epsilon$ -N<sub>2</sub> at 54 GPa as well as  $\zeta$ -N<sub>2</sub> at 63, 70 and 86 GPa.

**File name: Supplementary Data 2**

Description: Electron Localization Functions (ELFs) of  $\zeta$ -N<sub>2</sub> at 110, 130, 140 and 150 GPa.
