# Supplementary material for: Structure determination of ζ-N2 from single-crystal X-ray diffraction and theoretical suggestion for the formation of amorphous nitrogen
Source: Nat Commun. 2023 Oct 5;14:6207. doi: 10.1038/s41467-023-41968-2 (PMC10556017; doi:10.1038/s41467-023-41968-2)
Supplement: Supplementary file 6 — Source data [file 41467_2023_41968_MOESM6_ESM.xlsx]

## Sheet: Figure 1a
Figure 1a
epsilon N2, 54 GPa			zeta-N2, 63 GPa			zeta-N2, 70 GPa			zeta-N2, 86 GPa			zeta-N2, 80 GPa			zeta-N2, 86 GPa			zeta-N2, 90 GPa			zeta-N2, 99 GPa			zeta-N2, 110 GPa
single crystal data			single crystal data			single crystal data			single crystal data			powder data; Gregoryanz et al 2007			powder data; Gregoryanz et al 2007			powder data; Gregoryanz et al 2007			powder data; Gregoryanz et al 2007			powder data; Gregoryanz et al 2007
P (GPa)	2theta		P (GPa)	2theta		P (GPa)	2theta		P (GPa)	2theta		P (GPa)	2theta		P (GPa)	2theta		P (GPa)	2theta		P (GPa)	2theta		P (GPa)	2theta
54	6.59806		63	6.68761		70	6.7587		86	6.93529		80	6.80563		86	6.85584		90	6.22482		99	6.96504		110	6.32781
54	7.09368		63	6.72215		70	6.7605		86	6.95303		80	6.84082		86	6.8852		90	6.89123		99	7.02717		110	7.00386
54	7.41966		63	7.13188		70	7.1668		86	7.2915		80	7.22352		86	7.29333		90	6.95729		99	7.40112		110	7.17613
54	7.6516		63	7.23459		70	7.3106		86	7.51083		80	7.34394		86	7.39982		90	7.3176		99	7.5159		110	7.48519
54	8.2095		63	7.25855		70	7.3119		86	7.52094		80	7.36841		86	7.42025		90	7.43068		99	7.5591		110	7.55128
54	8.88411		63	7.51774		70	7.5691		86	7.72666		80	7.59139		86	7.66763		90	7.47668		99	7.78211		110	7.67167
			63	7.55903		70	7.6386		86	7.74562		80	7.64109		86	7.71191		90	7.6862		99	7.8715		110	7.84442
			63	7.7289		70	7.7974		86	7.9463		80	7.8824		86	7.93641		90	7.77711		99	8.0787		110	7.97247
			63	7.75125		70	7.7986		86	7.95644		80	7.90522		86	7.95547		90	8.00023		99	8.11893		110	8.16369
			63	7.88276		70	7.9292		86	8.39614		80	8.05293		86	8.08453		90	8.043		99	8.15738		110	8.17774
			63	8.22271		70	8.266		86	8.6852		80	8.36249		86	8.43444		90	8.07548		99	8.58661		110	8.2891
			63	8.37718		70	8.4536		86	8.68855		80	8.53968		86	8.59018		90	8.50083		99	8.75364		110	8.73617
			63	8.45542		70	8.5138		86	9.06056		80	8.6258		86	8.66485		90	8.6667		99	8.75912		110	8.77987
			63	8.4816		70	8.5478		86	9.06357		80	8.6482		86	8.71431		90	8.66862		99	8.91756		110	8.87297
			63	8.67151		70	8.7273		86	9.41425		80	8.8605		86	8.89934		90	8.8357		99	9.00639		110	9.05632
			63	8.89878		70	8.9409		86	9.41995		80	9.00091		86	9.09625		90	8.91865		99	9.23903		110	9.1257
			63	9.0889		70	9.1719		86	9.42608		80	9.2202		86	9.28868		90	9.13289		99	9.44582		110	9.35921
			63	9.19735		70	9.2808					80	9.28971		86	9.37852		90	9.33846		99	9.54496		110	9.52942
																		90	9.4274					110	9.63656

## Sheet: Figure 1b
Figure 1b
2theta	Observed Intensity	2theta	Calculated Intensity	2theta	Difference between observed and calculated intensity	2theta position of tick marks
3.0311	1	3.0311	1.018	3.0311	-40.1055	3.3779	-7.65
3.0422	1	3.0422	1.018	3.0422	-40.1055	4.467	-7.65
3.0533	1	3.0533	1.018	3.0533	-40.1055	4.5823	-7.65
3.0643	1	3.0643	1.018	3.0643	-40.1055	4.9667	-7.65
3.0754	1	3.0754	1.018	3.0754	-40.1055	5.0694	-7.65
3.0865	1	3.0865	1.019	3.0865	-40.1065	6.0935	-7.65
3.0976	1	3.0976	1.019	3.0976	-40.1065	6.7587	-7.65
3.1086	1	3.1086	1.019	3.1086	-40.1065	6.7605	-7.65
3.1197	1	3.1197	1.019	3.1197	-40.1065	7.1668	-7.65
3.1308	1	3.1308	1.02	3.1308	-40.1075	7.3106	-7.65
3.1419	1	3.1419	1.02	3.1419	-40.1075	7.3119	-7.65
3.153	2	3.153	1.021	3.153	-39.1085	7.5691	-7.65
3.164	2	3.164	1.021	3.164	-39.1085	7.6386	-7.65
3.1751	2	3.1751	1.022	3.1751	-39.1095	7.7974	-7.65
3.1862	2	3.1862	1.024	3.1862	-39.1115	7.7986	-7.65
3.1973	1	3.1973	1.026	3.1973	-40.1135	7.9292	-7.65
3.2083	1	3.2083	1.03	3.2083	-40.1175	8.266	-7.65
3.2194	1	3.2194	1.038	3.2194	-40.1255	8.4536	-7.65
3.2305	1	3.2305	1.05	3.2305	-40.1375	8.5138	-7.65
3.2416	1	3.2416	1.07	3.2416	-40.1575	8.5478	-7.65
3.2526	1	3.2526	1.102	3.2526	-40.1895	8.7273	-7.65
3.2637	1	3.2637	1.151	3.2637	-40.2385	8.9409	-7.65
3.2748	1	3.2748	1.223	3.2748	-40.3105	9.1719	-7.65
3.2859	1	3.2859	1.322	3.2859	-40.4095	9.2808	-7.65
3.2969	1	3.2969	1.45	3.2969	-40.5375	9.9428	-7.65
3.308	1	3.308	1.607	3.308	-40.6945	10.1454	-7.65
3.3191	1	3.3191	1.787	3.3191	-40.8745	10.1488	-7.65
3.3302	1	3.3302	1.979	3.3302	-41.0665	10.2487	-7.65
3.3412	1	3.3412	2.166	3.3412	-41.2535	10.2832	-7.65
3.3523	1	3.3523	2.328	3.3523	-41.4155	10.404	-7.65
3.3634	1	3.3634	2.446	3.3634	-41.5335	10.4342	-7.65
3.3745	1	3.3745	2.502	3.3745	-41.5895	10.4366	-7.65
3.3855	1	3.3855	2.488	3.3855	-41.5755	10.4807	-7.65
3.3966	1	3.3966	2.407	3.3966	-41.4945	10.5391	-7.65
3.4077	1	3.4077	2.27	3.4077	-41.3575	10.6024	-7.65
3.4188	1	3.4188	2.096	3.4188	-41.1835	10.6993	-7.65
3.4299	1	3.4299	1.905	3.4299	-40.9925	10.9516	-7.65
3.4409	1	3.4409	1.716	3.4409	-40.8035	10.9538	-7.65
3.452	1	3.452	1.543	3.452	-40.6305	11.0932	-7.65
3.4631	1	3.4631	1.397	3.4631	-40.4845	11.1624	-7.65
3.4742	1	3.4742	1.28	3.4742	-40.3675	11.3498	-7.65
3.4852	2	3.4852	1.192	3.4852	-39.2795	11.4392	-7.65
3.4963	2	3.4963	1.13	3.4963	-39.2175	11.4678	-7.65
3.5074	2	3.5074	1.088	3.5074	-39.1755	11.566	-7.65
3.5185	2	3.5185	1.061	3.5185	-39.1485	11.7012	-7.65
3.5295	2	3.5295	1.044	3.5295	-39.1315	11.7385	-7.65
3.5406	2	3.5406	1.034	3.5406	-39.1215	11.7398	-7.65
3.5517	1	3.5517	1.029	3.5517	-40.1165	11.747	-7.65
3.5628	2	3.5628	1.025	3.5628	-39.1125	11.7575	-7.65
3.5738	2	3.5738	1.023	3.5738	-39.1105	11.8574	-7.65
3.5849	2	3.5849	1.022	3.5849	-39.1095	12.2042	-7.65
3.596	2	3.596	1.021	3.596	-39.1085	12.3386	-7.65
3.6071	1	3.6071	1.021	3.6071	-40.1085	12.6107	-7.65
3.6181	1	3.6181	1.02	3.6181	-40.1075	12.6475	-7.65
3.6292	1	3.6292	1.02	3.6292	-40.1075	12.6487	-7.65
3.6403	1	3.6403	1.019	3.6403	-40.1065	12.6744	-7.65
3.6514	1	3.6514	1.019	3.6514	-40.1065	12.7143	-7.65
3.6624	1	3.6624	1.019	3.6624	-40.1065	12.8919	-7.65
3.6735	1	3.6735	1.018	3.6735	-40.1055	12.9027	-7.65
3.6846	1	3.6846	1.018	3.6846	-40.1055	13.0864	-7.65
3.6957	1	3.6957	1.018	3.6957	-40.1055	13.1047	-7.65
3.7068	1	3.7068	1.018	3.7068	-40.1055	13.2614	-7.65
3.7178	2	3.7178	1.018	3.7178	-39.1055	13.2834	-7.65
3.7289	1	3.7289	1.017	3.7289	-40.1045	13.4002	-7.65
3.74	1	3.74	1.017	3.74	-40.1045	13.4284	-7.65
3.7511	1	3.7511	1.018	3.7511	-40.1055	13.5384	-7.65
3.7621	1	3.7621	1.018	3.7621	-40.1055	13.541	-7.65
3.7732	1	3.7732	1.018	3.7732	-40.1055	13.5446	-7.65
3.7843	1	3.7843	1.018	3.7843	-40.1055	13.6219	-7.65
3.7954	1	3.7954	1.018	3.7954	-40.1055	13.677	-7.65
3.8064	2	3.8064	1.018	3.8064	-39.1055	13.6922	-7.65
3.8175	2	3.8175	1.018	3.8175	-39.1055	13.6955	-7.65
3.8286	2	3.8286	1.018	3.8286	-39.1055	13.7398	-7.65
3.8397	2	3.8397	1.018	3.8397	-39.1055	13.7763	-7.65
3.8507	1	3.8507	1.018	3.8507	-40.1055	14.0011	-7.65
3.8618	1	3.8618	1.018	3.8618	-40.1055	14.2229	-7.65
3.8729	1	3.8729	1.018	3.8729	-40.1055	14.2261	-7.65
3.884	1	3.884	1.018	3.884	-40.1055	14.2854	-7.65
3.895	2	3.895	1.018	3.895	-39.1055	14.29	-7.65
3.9061	1	3.9061	1.018	3.9061	-40.1055	14.3617	-7.65
3.9172	1	3.9172	1.018	3.9172	-40.1055	14.3691	-7.65
3.9283	1	3.9283	1.018	3.9283	-40.1055	14.371	-7.65
3.9393	1	3.9393	1.018	3.9393	-40.1055	14.3762	-7.65
3.9504	1	3.9504	1.018	3.9504	-40.1055	14.4005	-7.65
3.9615	1	3.9615	1.018	3.9615	-40.1055	14.4426	-7.65
3.9726	1	3.9726	1.018	3.9726	-40.1055	14.4705	-7.65
3.9837	1	3.9837	1.018	3.9837	-40.1055	14.5217	-7.65
3.9947	1	3.9947	1.018	3.9947	-40.1055	14.5755	-7.65
4.0058	1	4.0058	1.018	4.0058	-40.1055	14.5961	-7.65
4.0169	2	4.0169	1.018	4.0169	-39.1055	14.6512	-7.65
4.028	2	4.028	1.018	4.028	-39.1055	14.6537	-7.65
4.039	2	4.039	1.018	4.039	-39.1055	14.6821	-7.65
4.0501	2	4.0501	1.018	4.0501	-39.1055	14.697	-7.65
4.0612	1	4.0612	1.018	4.0612	-40.1055	14.7792	-7.65
4.0723	1	4.0723	1.019	4.0723	-40.1065	14.9378	-7.65
4.0833	2	4.0833	1.019	4.0833	-39.1065	14.9522	-7.65
4.0944	1	4.0944	1.019	4.0944	-40.1065	15.1302	-7.65
4.1055	1	4.1055	1.019	4.1055	-40.1065	15.1715	-7.65
4.1166	1	4.1166	1.019	4.1166	-40.1065	15.2162	-7.65
4.1276	1	4.1276	1.019	4.1276	-40.1065	15.2483	-7.65
4.1387	1	4.1387	1.02	4.1387	-40.1075	15.3114	-7.65
4.1498	1	4.1498	1.02	4.1498	-40.1075	15.4215	-7.65
4.1609	1	4.1609	1.02	4.1609	-40.1075	15.4756	-7.65
4.1719	1	4.1719	1.021	4.1719	-40.1085	15.5408	-7.65
4.183	1	4.183	1.021	4.183	-40.1085	15.6225	-7.65
4.1941	1	4.1941	1.021	4.1941	-40.1085	15.6313	-7.65
4.2052	1	4.2052	1.022	4.2052	-40.1095	15.6336	-7.65
4.2162	1	4.2162	1.022	4.2162	-40.1095	15.7474	-7.65
4.2273	1	4.2273	1.023	4.2273	-40.1105	15.7708	-7.65
4.2384	1	4.2384	1.023	4.2384	-40.1105	15.8402	-7.65
4.2495	1	4.2495	1.024	4.2495	-40.1115	15.8856	-7.65
4.2606	1	4.2606	1.025	4.2606	-40.1125	15.8967	-7.65
4.2716	1	4.2716	1.026	4.2716	-40.1135	15.9483	-7.65
4.2827	2	4.2827	1.028	4.2827	-39.1155	16.0493	-7.65
4.2938	2	4.2938	1.03	4.2938	-39.1175	16.1045	-7.65
4.3049	2	4.3049	1.034	4.3049	-39.1215	16.1383	-7.65
4.3159	2	4.3159	1.04	4.3159	-39.1275	16.1416	-7.65
4.327	2	4.327	1.053	4.327	-39.1405	16.2185	-7.65
4.3381	2	4.3381	1.076	4.3381	-39.1635	16.242	-7.65
4.3492	2	4.3492	1.119	4.3492	-39.2065	16.2631	-7.65
4.3602	2	4.3602	1.193	4.3602	-39.2805	16.2788	-7.65
4.3713	2	4.3713	1.314	4.3713	-39.4015	16.2801	-7.65
4.3824	2	4.3824	1.499	4.3824	-39.5865	16.3702	-7.65
4.3935	2	4.3935	1.759	4.3935	-39.8465	16.5107	-7.65
4.4045	2	4.4045	2.1	4.4045	-40.1875	16.5754	-7.65
4.4156	2	4.4156	2.507	4.4156	-40.5945	16.6024	-7.65
4.4267	2	4.4267	2.95	4.4267	-41.0375	16.6383	-7.65
4.4378	2	4.4378	3.376	4.4378	-41.4635	16.6411	-7.65
4.4488	2	4.4488	3.723	4.4488	-41.8105	16.6961	-7.65
4.4599	2	4.4599	3.931	4.4599	-42.0185	16.7026	-7.65
4.471	2	4.471	3.96	4.471	-42.0475	16.8605	-7.65
4.4821	2	4.4821	3.803	4.4821	-41.8905	16.8728	-7.65
4.4931	2	4.4931	3.494	4.4931	-41.5815	16.9486	-7.65
4.5042	2	4.5042	3.089	4.5042	-41.1765	16.9536	-7.65
4.5153	2	4.5153	2.653	4.5153	-40.7405	17.0157	-7.65
4.5264	2	4.5264	2.24	4.5264	-40.3275	17.02	-7.65
4.5375	2	4.5375	1.888	4.5375	-39.9755	17.075	-7.65
4.5485	1	4.5485	1.615	4.5485	-40.7025	17.1108	-7.65
4.5596	1	4.5596	1.419	4.5596	-40.5065	17.1403	-7.65
4.5707	2	4.5707	1.288	4.5707	-39.3755	17.1436	-7.65
4.5818	2	4.5818	1.204	4.5818	-39.2915	17.4071	-7.65
4.5928	1	4.5928	1.152	4.5928	-40.2395	17.4485	-7.65
4.6039	1	4.6039	1.118	4.6039	-40.2055	17.5057	-7.65
4.615	1	4.615	1.094	4.615	-40.1815	17.5222	-7.65
4.6261	1	4.6261	1.076	4.6261	-40.1635	17.5542	-7.65
4.6371	1	4.6371	1.062	4.6371	-40.1495	17.5584	-7.65
4.6482	1	4.6482	1.05	4.6482	-40.1375	17.558	-7.65
4.6593	1	4.6593	1.042	4.6593	-40.1295	17.5969	-7.65
4.6704	1	4.6704	1.035	4.6704	-40.1225	17.5981	-7.65
4.6814	1	4.6814	1.031	4.6814	-40.1185	17.6513	-7.65
4.6925	1	4.6925	1.027	4.6925	-40.1145	17.7033	-7.65
4.7036	1	4.7036	1.025	4.7036	-40.1125	17.7056	-7.65
4.7147	1	4.7147	1.024	4.7147	-40.1115	17.7481	-7.65
4.7257	1	4.7257	1.023	4.7257	-40.1105	17.7517	-7.65
4.7368	1	4.7368	1.023	4.7368	-40.1105	17.7529	-7.65
4.7479	1	4.7479	1.022	4.7479	-40.1095	17.8186	-7.65
4.759	1	4.759	1.022	4.759	-40.1095	17.8199	-7.65
4.77	1	4.77	1.022	4.77	-40.1095	17.8882	-7.65
4.7811	1	4.7811	1.021	4.7811	-40.1085	17.9082	-7.65
4.7922	1	4.7922	1.021	4.7922	-40.1085	17.9368	-7.65
4.8033	1	4.8033	1.021	4.8033	-40.1085	17.9506	-7.65
4.8144	1	4.8144	1.021	4.8144	-40.1085	17.9605	-7.65
4.8254	1	4.8254	1.022	4.8254	-40.1095	18.0201	-7.65
4.8365	1	4.8365	1.023	4.8365	-40.1105	18.021	-7.65
4.8476	1	4.8476	1.025	4.8476	-40.1125	18.0919	-7.65
4.8587	1	4.8587	1.029	4.8587	-40.1165	18.1409	-7.65
4.8697	1	4.8697	1.037	4.8697	-40.1245	18.1974	-7.65
4.8808	1	4.8808	1.048	4.8808	-40.1355	18.2199	-7.65
4.8919	1	4.8919	1.066	4.8919	-40.1535	18.2336	-7.65
4.903	2	4.903	1.091	4.903	-39.1785	18.322	-7.65
4.914	1	4.914	1.121	4.914	-40.2085	18.3501	-7.65
4.9251	1	4.9251	1.156	4.9251	-40.2435	18.3935	-7.65
4.9362	1	4.9362	1.193	4.9362	-40.2805	18.4032	-7.65
4.9473	1	4.9473	1.226	4.9473	-40.3135	18.49	-7.65
4.9583	1	4.9583	1.252	4.9583	-40.3395	18.5408	-7.65
4.9694	1	4.9694	1.269	4.9694	-40.3565	18.5443	-7.65
4.9805	1	4.9805	1.28	4.9805	-40.3675	18.5618	-7.65
4.9916	1	4.9916	1.29	4.9916	-40.3775	18.5718	-7.65
5.0026	1	5.0026	1.306	5.0026	-40.3935	18.5964	-7.65
5.0137	1	5.0137	1.334	5.0137	-40.4215	18.6233	-7.65
5.0248	1	5.0248	1.374	5.0248	-40.4615	18.6508	-7.65
5.0359	1	5.0359	1.423	5.0359	-40.5105	18.7695	-7.65
5.0469	1	5.0469	1.47	5.0469	-40.5575	18.7729	-7.65
5.058	1	5.058	1.503	5.058	-40.5905	18.7892	-7.65
5.0691	1	5.0691	1.512	5.0691	-40.5995	18.8017	-7.65
5.0802	1	5.0802	1.49	5.0802	-40.5775	18.8449	-7.65
5.0913	1	5.0913	1.441	5.0913	-40.5285	18.9034	-7.65
5.1023	1	5.1023	1.371	5.1023	-40.4585	18.9392	-7.65
5.1134	1	5.1134	1.294	5.1134	-40.3815	18.988	-7.65
5.1245	1	5.1245	1.22	5.1245	-40.3075	19.0477	-7.65
5.1356	1	5.1356	1.157	5.1356	-40.2445	19.0716	-7.65
5.1466	1	5.1466	1.107	5.1466	-40.1945	19.0742	-7.65
5.1577	1	5.1577	1.072	5.1577	-40.1595	19.091	-7.65
5.1688	1	5.1688	1.049	5.1688	-40.1365	19.1036	-7.65
5.1799	1	5.1799	1.035	5.1799	-40.1225	19.1711	-7.65
5.1909	1	5.1909	1.027	5.1909	-40.1145	19.1893	-7.65
5.202	1	5.202	1.022	5.202	-40.1095	19.2052	-7.65
5.2131	1	5.2131	1.02	5.2131	-40.1075	19.2209	-7.65
5.2242	1	5.2242	1.019	5.2242	-40.1065	19.2295	-7.65
5.2352	1	5.2352	1.018	5.2352	-40.1055	19.2982	-7.65
5.2463	1	5.2463	1.017	5.2463	-40.1045	19.3415	-7.65
5.2574	1	5.2574	1.017	5.2574	-40.1045	19.3499	-7.65
5.2685	1	5.2685	1.017	5.2685	-40.1045	19.3595	-7.65
5.2795	1	5.2795	1.017	5.2795	-40.1045	19.4169	-7.65
5.2906	1	5.2906	1.017	5.2906	-40.1045	19.4949	-7.65
5.3017	1	5.3017	1.017	5.3017	-40.1045	19.641	-7.65
5.3128	1	5.3128	1.016	5.3128	-40.1035	19.7973	-7.65
5.3238	1	5.3238	1.016	5.3238	-40.1035	19.8387	-7.65
5.3349	1	5.3349	1.016	5.3349	-40.1035	19.8894	-7.65
5.346	1	5.346	1.016	5.346	-40.1035	19.8977	-7.65
5.3571	1	5.3571	1.016	5.3571	-40.1035	19.9525	-7.65
5.3682	1	5.3682	1.016	5.3682	-40.1035	19.9535	-7.65
5.3792	1	5.3792	1.016	5.3792	-40.1035	19.9615	-7.65
5.3903	1	5.3903	1.016	5.3903	-40.1035
5.4014	2	5.4014	1.016	5.4014	-39.1035
5.4125	2	5.4125	1.016	5.4125	-39.1035
5.4235	2	5.4235	1.016	5.4235	-39.1035
5.4346	3	5.4346	1.016	5.4346	-38.1035
5.4457	3	5.4457	1.016	5.4457	-38.1035
5.4568	3	5.4568	1.016	5.4568	-38.1035
5.4678	3	5.4678	1.016	5.4678	-38.1035
5.4789	2	5.4789	1.016	5.4789	-39.1035
5.49	2	5.49	1.016	5.49	-39.1035
5.5011	1	5.5011	1.016	5.5011	-40.1035
5.5121	1	5.5121	1.016	5.5121	-40.1035
5.5232	1	5.5232	1.016	5.5232	-40.1035
5.5343	1	5.5343	1.016	5.5343	-40.1035
5.5454	1	5.5454	1.016	5.5454	-40.1035
5.5564	1	5.5564	1.016	5.5564	-40.1035
5.5675	1	5.5675	1.016	5.5675	-40.1035
5.5786	1	5.5786	1.016	5.5786	-40.1035
5.5897	1	5.5897	1.016	5.5897	-40.1035
5.6007	1	5.6007	1.016	5.6007	-40.1035
5.6118	1	5.6118	1.016	5.6118	-40.1035
5.6229	1	5.6229	1.017	5.6229	-40.1045
5.634	1	5.634	1.017	5.634	-40.1045
5.6451	1	5.6451	1.017	5.6451	-40.1045
5.6561	1	5.6561	1.017	5.6561	-40.1045
5.6672	1	5.6672	1.017	5.6672	-40.1045
5.6783	1	5.6783	1.017	5.6783	-40.1045
5.6894	1	5.6894	1.017	5.6894	-40.1045
5.7004	1	5.7004	1.017	5.7004	-40.1045
5.7115	1	5.7115	1.017	5.7115	-40.1045
5.7226	1	5.7226	1.017	5.7226	-40.1045
5.7337	1	5.7337	1.017	5.7337	-40.1045
5.7447	1	5.7447	1.017	5.7447	-40.1045
5.7558	1	5.7558	1.017	5.7558	-40.1045
5.7669	1	5.7669	1.017	5.7669	-40.1045
5.778	1	5.778	1.018	5.778	-40.1055
5.789	1	5.789	1.018	5.789	-40.1055
5.8001	2	5.8001	1.018	5.8001	-39.1055
5.8112	2	5.8112	1.018	5.8112	-39.1055
5.8223	2	5.8223	1.018	5.8223	-39.1055
5.8333	2	5.8333	1.019	5.8333	-39.1065
5.8444	2	5.8444	1.019	5.8444	-39.1065
5.8555	2	5.8555	1.019	5.8555	-39.1065
5.8666	2	5.8666	1.02	5.8666	-39.1075
5.8776	3	5.8776	1.02	5.8776	-38.1075
5.8887	3	5.8887	1.021	5.8887	-38.1085
5.8998	2	5.8998	1.021	5.8998	-39.1085
5.9109	2	5.9109	1.022	5.9109	-39.1095
5.922	1	5.922	1.023	5.922	-40.1105
5.933	1	5.933	1.025	5.933	-40.1125
5.9441	1	5.9441	1.028	5.9441	-40.1155
5.9552	1	5.9552	1.034	5.9552	-40.1215
5.9663	1	5.9663	1.045	5.9663	-40.1325
5.9773	1	5.9773	1.066	5.9773	-40.1535
5.9884	1	5.9884	1.106	5.9884	-40.1935
5.9995	1	5.9995	1.175	5.9995	-40.2625
6.0106	1	6.0106	1.285	6.0106	-40.3725
6.0216	1	6.0216	1.448	6.0216	-40.5355
6.0327	1	6.0327	1.669	6.0327	-40.7565
6.0438	1	6.0438	1.985	6.0438	-41.0725
6.0549	1	6.0549	2.287	6.0549	-41.3745
6.0659	1	6.0659	2.579	6.0659	-41.6665
6.077	1	6.077	2.814	6.077	-41.9015
6.0881	1	6.0881	2.946	6.0881	-42.0335
6.0992	1	6.0992	2.945	6.0992	-42.0325
6.1102	1	6.1102	2.813	6.1102	-41.9005
6.1213	1	6.1213	2.579	6.1213	-41.6665
6.1324	1	6.1324	2.289	6.1324	-41.3765
6.1435	1	6.1435	1.99	6.1435	-41.0775
6.1545	1	6.1545	1.722	6.1545	-40.8095
6.1656	1	6.1656	1.505	6.1656	-40.5925
6.1767	1	6.1767	1.346	6.1767	-40.4335
6.1878	1	6.1878	1.239	6.1878	-40.3265
6.1989	1	6.1989	1.175	6.1989	-40.2625
6.2099	1	6.2099	1.138	6.2099	-40.2255
6.221	1	6.221	1.12	6.221	-40.2075
6.2321	1	6.2321	1.112	6.2321	-40.1995
6.2432	1	6.2432	1.11	6.2432	-40.1975
6.2542	1	6.2542	1.111	6.2542	-40.1985
6.2653	1	6.2653	1.113	6.2653	-40.2005
6.2764	1	6.2764	1.116	6.2764	-40.2035
6.2875	1	6.2875	1.12	6.2875	-40.2075
6.2985	1	6.2985	1.124	6.2985	-40.2115
6.3096	1	6.3096	1.128	6.3096	-40.2155
6.3207	1	6.3207	1.133	6.3207	-40.2205
6.3318	1	6.3318	1.139	6.3318	-40.2265
6.3428	1	6.3428	1.145	6.3428	-40.2325
6.3539	1	6.3539	1.151	6.3539	-40.2385
6.365	2	6.365	1.158	6.365	-39.2455
6.3761	2	6.3761	1.166	6.3761	-39.2535
6.3871	2	6.3871	1.175	6.3871	-39.2625
6.3982	2	6.3982	1.184	6.3982	-39.2715
6.4093	1	6.4093	1.199	6.4093	-40.2865
6.4204	1	6.4204	1.21	6.4204	-40.2975
6.4314	1	6.4314	1.223	6.4314	-40.3105
6.4425	1	6.4425	1.237	6.4425	-40.3245
6.4536	1	6.4536	1.252	6.4536	-40.3395
6.4647	1	6.4647	1.27	6.4647	-40.3575
6.4758	1	6.4758	1.289	6.4758	-40.3765
6.4868	1	6.4868	1.31	6.4868	-40.3975
6.4979	1	6.4979	1.334	6.4979	-40.4215
6.509	1	6.509	1.361	6.509	-40.4485
6.5201	1	6.5201	1.392	6.5201	-40.4795
6.5311	1	6.5311	1.427	6.5311	-40.5145
6.5422	1	6.5422	1.475	6.5422	-40.5625
6.5533	1	6.5533	1.523	6.5533	-40.6105
6.5644	1	6.5644	1.581	6.5644	-40.6685
6.5754	2	6.5754	1.658	6.5754	-39.7455
6.5865	3	6.5865	1.768	6.5865	-38.8555
6.5976	3	6.5976	1.948	6.5976	-39.0355
6.6087	4	6.6087	2.271	6.6087	-38.3585
6.6197	5	6.6197	2.882	6.6197	-37.9695
6.6308	7	6.6308	4.038	6.6308	-37.1255
6.6419	9	6.6419	6.155	6.6419	-37.2425
6.653	12	6.653	9.846	6.653	-37.9335
6.664	16	6.664	15.897	6.664	-39.9845
6.6751	23	6.6751	25.156	6.6751	-42.2435
6.6862	32	6.6862	38.308	6.6862	-46.3955
6.6973	45	6.6973	55.551	6.6973	-50.6385
6.7083	61	6.7083	76.261	6.7083	-55.3485
6.7194	82	6.7194	98.782	6.7194	-56.8695
6.7305	108	6.7305	120.483	6.7305	-52.5705
6.7416	135	6.7416	138.144	6.7416	-43.2315
6.7527	159	6.7527	148.654	6.7527	-29.7415
6.7637	174	6.7637	149.929	6.7637	-16.0165
6.7748	171	6.7748	141.705	6.7748	-10.7925
6.7859	151	6.7859	125.644	6.7859	-14.7315
6.797	118	6.797	104.683	6.797	-26.7705
6.808	82	6.808	82.092	6.808	-40.1795
6.8191	54	6.8191	60.708	6.8191	-46.7955
6.8302	35	6.8302	42.461	6.8302	-47.5485
6.8413	23	6.8413	28.231	6.8413	-45.3185
6.8523	15	6.8523	18.009	6.8523	-43.0965
6.8634	9	6.8634	11.202	6.8634	-42.2895
6.8745	6	6.8745	6.978	6.8745	-41.0655
6.8856	4	6.8856	4.52	6.8856	-40.6075
6.8966	3	6.8966	3.165	6.8966	-40.2525
6.9077	2	6.9077	2.447	6.9077	-40.5345
6.9188	1	6.9188	2.071	6.9188	-41.1585
6.9299	1	6.9299	1.869	6.9299	-40.9565
6.9409	1	6.9409	1.752	6.9409	-40.8395
6.952	1	6.952	1.676	6.952	-40.7635
6.9631	1	6.9631	1.623	6.9631	-40.7105
6.9742	1	6.9742	1.596	6.9742	-40.6835
6.9852	1	6.9852	1.569	6.9852	-40.6565
6.9963	1	6.9963	1.554	6.9963	-40.6415
7.0074	1	7.0074	1.558	7.0074	-40.6455
7.0185	1	7.0185	1.594	7.0185	-40.6815
7.0296	1	7.0296	1.682	7.0296	-40.7695
7.0406	1	7.0406	1.861	7.0406	-40.9485
7.0517	2	7.0517	2.182	7.0517	-40.2695
7.0628	3	7.0628	2.715	7.0628	-39.8025
7.0739	3	7.0739	3.54	7.0739	-40.6275
7.0849	4	7.0849	4.733	7.0849	-40.8205
7.096	6	7.096	6.325	7.096	-40.4125
7.1071	8	7.1071	8.298	7.1071	-40.3855
7.1182	10	7.1182	10.547	7.1182	-40.6345
7.1292	13	7.1292	12.874	7.1292	-39.9615
7.1403	15	7.1403	15.01	7.1403	-40.0975
7.1514	16	7.1514	16.661	7.1514	-40.7485
7.1625	17	7.1625	17.581	7.1625	-40.6685
7.1735	17	7.1735	17.656	7.1735	-40.7435
7.1846	17	7.1846	16.962	7.1846	-40.0495
7.1957	16	7.1957	15.769	7.1957	-39.8565
7.2068	16	7.2068	14.463	7.2068	-38.5505
7.2178	16	7.2178	13.465	7.2178	-37.5525
7.2289	16	7.2289	13.136	7.2289	-37.2235
7.24	17	7.24	13.705	7.24	-36.7925
7.2511	18	7.2511	15.218	7.2511	-37.3055
7.2621	20	7.2621	17.514	7.2621	-37.6015
7.2732	22	7.2732	20.247	7.2732	-38.3345
7.2843	23	7.2843	22.937	7.2843	-40.0245
7.2954	23	7.2954	25.065	7.2954	-42.1525
7.3065	23	7.3065	26.171	7.3065	-43.2585
7.3175	22	7.3175	25.982	7.3175	-44.0695
7.3286	20	7.3286	24.48	7.3286	-44.5675
7.3397	18	7.3397	21.901	7.3397	-43.9885
7.3508	16	7.3508	18.637	7.3508	-42.7245
7.3618	14	7.3618	15.128	7.3618	-41.2155
7.3729	11	7.3729	11.766	7.3729	-40.8535
7.384	10	7.384	8.821	7.384	-38.9085
7.3951	8	7.3951	6.447	7.3951	-38.5345
7.4061	7	7.4061	4.676	7.4061	-37.7635
7.4172	7	7.4172	3.459	7.4172	-36.5465
7.4283	6	7.4283	2.702	7.4283	-36.7895
7.4394	6	7.4394	2.312	7.4394	-36.3995
7.4504	5	7.4504	2.214	7.4504	-37.3015
7.4615	5	7.4615	2.365	7.4615	-37.4525
7.4726	5	7.4726	2.748	7.4726	-37.8355
7.4837	6	7.4837	3.325	7.4837	-37.4125
7.4947	6	7.4947	4.184	7.4947	-38.2715
7.5058	6	7.5058	5.271	7.5058	-39.3585
7.5169	7	7.5169	6.552	7.5169	-39.6395
7.528	8	7.528	7.969	7.528	-40.0565
7.539	9	7.539	9.398	7.539	-40.4855
7.5501	10	7.5501	10.735	7.5501	-40.8225
7.5612	10	7.5612	11.866	7.5612	-41.9535
7.5723	11	7.5723	12.7	7.5723	-41.7875
7.5834	11	7.5834	13.194	7.5834	-42.2815
7.5944	11	7.5944	13.345	7.5944	-42.4325
7.6055	11	7.6055	13.19	7.6055	-42.2775
7.6166	10	7.6166	12.789	7.6166	-42.8765
7.6277	9	7.6277	12.18	7.6277	-43.2675
7.6387	9	7.6387	11.438	7.6387	-42.5255
7.6498	10	7.6498	10.656	7.6498	-40.7435
7.6609	13	7.6609	9.972	7.6609	-37.0595
7.672	13	7.672	9.568	7.672	-36.6555
7.683	14	7.683	9.658	7.683	-35.7455
7.6941	13	7.6941	10.468	7.6941	-37.5555
7.7052	15	7.7052	12.194	7.7052	-37.2815
7.7163	18	7.7163	14.964	7.7163	-37.0515
7.7273	22	7.7273	18.785	7.7273	-36.8725
7.7384	26	7.7384	23.501	7.7384	-37.5885
7.7495	30	7.7495	28.778	7.7495	-38.8655
7.7606	35	7.7606	34.117	7.7606	-39.2045
7.7716	40	7.7716	38.913	7.7716	-39.0005
7.7827	43	7.7827	42.551	7.7827	-39.6385
7.7938	43	7.7938	44.533	7.7938	-41.6205
7.8049	42	7.8049	44.605	7.8049	-42.6925
7.8159	40	7.8159	42.851	7.8159	-42.9385
7.827	37	7.827	39.665	7.827	-42.7525
7.8381	33	7.8381	35.639	7.8381	-42.7265
7.8492	30	7.8492	31.41	7.8492	-41.4975
7.8603	27	7.8603	27.534	7.8603	-40.6215
7.8713	24	7.8713	24.384	7.8713	-40.4715
7.8824	23	7.8824	22.113	7.8824	-39.2005
7.8935	21	7.8935	20.656	7.8935	-39.7435
7.9046	20	7.9046	19.783	7.9046	-39.8705
7.9156	19	7.9156	19.175	7.9156	-40.2625
7.9267	18	7.9267	18.513	7.9267	-40.6005
7.9378	17	7.9378	17.572	7.9378	-40.6595
7.9489	15	7.9489	16.238	7.9489	-41.3255
7.9599	14	7.9599	14.535	7.9599	-40.6225
7.971	12	7.971	12.58	7.971	-40.6675
7.9821	11	7.9821	10.533	7.9821	-39.6205
7.9932	9	7.9932	8.553	7.9932	-39.6405
8.0042	8	8.0042	6.77	8.0042	-38.8575
8.0153	6	8.0153	5.267	8.0153	-39.3545
8.0264	5	8.0264	4.075	8.0264	-39.1625
8.0375	4	8.0375	3.185	8.0375	-39.2725
8.0485	3	8.0485	2.558	8.0485	-39.6455
8.0596	3	8.0596	2.145	8.0596	-39.2325
8.0707	2	8.0707	1.896	8.0707	-39.9835
8.0818	2	8.0818	1.773	8.0818	-39.8605
8.0928	2	8.0928	1.747	8.0928	-39.8345
8.1039	2	8.1039	1.826	8.1039	-39.9135
8.115	3	8.115	2.019	8.115	-39.1065
8.1261	3	8.1261	2.359	8.1261	-39.4465
8.1372	4	8.1372	2.899	8.1372	-38.9865
8.1482	6	8.1482	3.696	8.1482	-37.7835
8.1593	6	8.1593	4.818	8.1593	-38.9055
8.1704	8	8.1704	6.32	8.1704	-38.4075
8.1815	10	8.1815	8.228	8.1815	-38.3155
8.1925	12	8.1925	10.523	8.1925	-38.6105
8.2036	13	8.2036	13.126	8.2036	-40.2135
8.2147	15	8.2147	15.891	8.2147	-40.9785
8.2258	17	8.2258	18.61	8.2258	-41.6975
8.2368	19	8.2368	21.04	8.2368	-42.1275
8.2479	20	8.2479	22.928	8.2479	-43.0155
8.259	21	8.259	24.065	8.259	-43.1525
8.2701	21	8.2701	24.333	8.2701	-43.4205
8.2811	21	8.2811	23.75	8.2811	-42.8375
8.2922	21	8.2922	22.479	8.2922	-41.5665
8.3033	21	8.3033	20.801	8.3033	-39.8885
8.3144	20	8.3144	19.068	8.3144	-39.1555
8.3254	21	8.3254	17.661	8.3254	-36.7485
8.3365	21	8.3365	16.941	8.3365	-36.0285
8.3476	22	8.3476	17.211	8.3476	-35.2985
8.3587	24	8.3587	18.686	8.3587	-34.7735
8.3697	26	8.3697	21.463	8.3697	-35.5505
8.3808	28	8.3808	25.506	8.3808	-37.5935
8.3919	32	8.3919	30.651	8.3919	-38.7385
8.403	38	8.403	36.597	8.403	-38.6845
8.4141	43	8.4141	42.942	8.4141	-40.0295
8.4251	49	8.4251	49.219	8.4251	-40.3065
8.4362	54	8.4362	54.946	8.4362	-41.0335
8.4473	59	8.4473	59.692	8.4473	-40.7795
8.4584	62	8.4584	63.142	8.4584	-41.2295
8.4694	63	8.4694	65.15	8.4694	-42.2375
8.4805	63	8.4805	65.73	8.4805	-42.8175
8.4916	62	8.4916	65.008	8.4916	-43.0955
8.5027	61	8.5027	63.161	8.5027	-42.2485
8.5137	60	8.5137	60.368	8.5137	-40.4555
8.5248	57	8.5248	56.786	8.5248	-39.8735
8.5359	54	8.5359	52.558	8.5359	-38.6455
8.547	49	8.547	47.814	8.547	-38.9015
8.558	43	8.558	42.701	8.558	-39.7885
8.5691	38	8.5691	37.393	8.5691	-39.4805
8.5802	32	8.5802	32.088	8.5802	-40.1755
8.5913	28	8.5913	26.993	8.5913	-39.0805
8.6023	23	8.6023	22.301	8.6023	-39.3885
8.6134	19	8.6134	18.169	8.6134	-39.2565
8.6245	16	8.6245	14.702	8.6245	-38.7895
8.6356	13	8.6356	11.938	8.6356	-39.0255
8.6466	11	8.6466	9.892	8.6466	-38.9795
8.6577	10	8.6577	8.488	8.6577	-38.5755
8.6688	9	8.6688	7.625	8.6688	-38.7125
8.6799	8	8.6799	7.176	8.6799	-39.2635
8.691	8	8.691	7.005	8.691	-39.0925
8.702	8	8.702	6.983	8.702	-39.0705
8.7131	8	8.7131	6.994	8.7131	-39.0815
8.7242	7	8.7242	6.953	8.7242	-40.0405
8.7353	7	8.7353	6.807	8.7353	-39.8945
8.7463	6	8.7463	6.537	8.7463	-40.6245
8.7574	5	8.7574	6.16	8.7574	-41.2475
8.7685	5	8.7685	5.721	8.7685	-40.8085
8.7796	4	8.7796	5.261	8.7796	-41.3485
8.7906	4	8.7906	4.858	8.7906	-40.9455
8.8017	4	8.8017	4.568	8.8017	-40.6555
8.8128	4	8.8128	4.446	8.8128	-40.5335
8.8239	4	8.8239	4.535	8.8239	-40.6225
8.8349	5	8.8349	4.864	8.8349	-39.9515
8.846	6	8.846	5.438	8.846	-39.5255
8.8571	8	8.8571	6.244	8.8571	-38.3315
8.8682	9	8.8682	7.243	8.8682	-38.3305
8.8792	10	8.8792	8.372	8.8792	-38.4595
8.8903	11	8.8903	9.55	8.8903	-38.6375
8.9014	12	8.9014	10.679	8.9014	-38.7665
8.9125	13	8.9125	11.655	8.9125	-38.7425
8.9235	13	8.9235	12.38	8.9235	-39.4675
8.9346	13	8.9346	12.777	8.9346	-39.8645
8.9457	12	8.9457	12.797	8.9457	-40.8845
8.9568	11	8.9568	12.439	8.9568	-41.5265
8.9679	10	8.9679	11.742	8.9679	-41.8295
8.9789	9	8.9789	10.782	8.9789	-41.8695
8.99	8	8.99	9.653	8.99	-41.7405
9.0011	7	9.0011	8.458	9.0011	-41.5455
9.0122	6	9.0122	7.294	9.0122	-41.3815
9.0232	6	9.0232	6.245	9.0232	-40.3325
9.0343	5	9.0343	5.374	9.0343	-40.4615
9.0454	5	9.0454	4.724	9.0454	-39.8115
9.0565	5	9.0565	4.313	9.0565	-39.4005
9.0675	6	9.0675	4.143	9.0675	-38.2305
9.0786	6	9.0786	4.196	9.0786	-38.2835
9.0897	6	9.0897	4.44	9.0897	-38.5275
9.1008	6	9.1008	4.835	9.1008	-38.9225
9.1118	6	9.1118	5.327	9.1118	-39.4145
9.1229	7	9.1229	5.862	9.1229	-38.9495
9.134	8	9.134	6.38	9.134	-38.4675
9.1451	8	9.1451	6.825	9.1451	-38.9125
9.1561	7	9.1561	7.145	9.1561	-40.2325
9.1672	7	9.1672	7.296	9.1672	-40.3835
9.1783	6	9.1783	7.269	9.1783	-41.3565
9.1894	6	9.1894	7.057	9.1894	-41.1445
9.2004	5	9.2004	6.679	9.2004	-41.7665
9.2115	5	9.2115	6.17	9.2115	-41.2575
9.2226	4	9.2226	5.571	9.2226	-41.6585
9.2337	4	9.2337	4.928	9.2337	-41.0155
9.2448	3	9.2448	4.283	9.2448	-41.3705
9.2558	3	9.2558	3.671	9.2558	-40.7585
9.2669	3	9.2669	3.119	9.2669	-40.2065
9.278	3	9.278	2.641	9.278	-39.7285
9.2891	3	9.2891	2.245	9.2891	-39.3325
9.3001	2	9.3001	1.929	9.3001	-40.0165
9.3112	2	9.3112	1.686	9.3112	-39.7735
9.3223	2	9.3223	1.505	9.3223	-39.5925
9.3334	1	9.3334	1.375	9.3334	-40.4625
9.3444	1	9.3444	1.284	9.3444	-40.3715
9.3555	1	9.3555	1.223	9.3555	-40.3105
9.3666	1	9.3666	1.182	9.3666	-40.2695
9.3777	1	9.3777	1.156	9.3777	-40.2435
9.3887	1	9.3887	1.125	9.3887	-40.2125
9.3998	1	9.3998	1.114	9.3998	-40.2015
9.4109	1	9.4109	1.107	9.4109	-40.1945
9.422	1	9.422	1.102	9.422	-40.1895
9.433	1	9.433	1.099	9.433	-40.1865
9.4441	1	9.4441	1.097	9.4441	-40.1845
9.4552	1	9.4552	1.092	9.4552	-40.1795
9.4663	1	9.4663	1.091	9.4663	-40.1785
9.4773	1	9.4773	1.09	9.4773	-40.1775
9.4884	1	9.4884	1.089	9.4884	-40.1765
9.4995	1	9.4995	1.083	9.4995	-40.1705
9.5106	1	9.5106	1.083	9.5106	-40.1705
9.5217	2	9.5217	1.083	9.5217	-39.1705
9.5327	2	9.5327	1.084	9.5327	-39.1715
9.5438	2	9.5438	1.085	9.5438	-39.1725
9.5549	2	9.5549	1.086	9.5549	-39.1735
9.566	2	9.566	1.088	9.566	-39.1755
9.577	2	9.577	1.09	9.577	-39.1775
9.5881	2	9.5881	1.092	9.5881	-39.1795
9.5992	2	9.5992	1.095	9.5992	-39.1825
9.6103	2	9.6103	1.098	9.6103	-39.1855
9.6213	2	9.6213	1.101	9.6213	-39.1885
9.6324	2	9.6324	1.105	9.6324	-39.1925
9.6435	2	9.6435	1.111	9.6435	-39.1985
9.6546	2	9.6546	1.117	9.6546	-39.2045
9.6656	3	9.6656	1.126	9.6656	-38.2135
9.6767	3	9.6767	1.139	9.6767	-38.2265
9.6878	2	9.6878	1.157	9.6878	-39.2445
9.6989	2	9.6989	1.183	9.6989	-39.2705
9.7099	2	9.7099	1.223	9.7099	-39.3105
9.721	2	9.721	1.282	9.721	-39.3695
9.7321	2	9.7321	1.369	9.7321	-39.4565
9.7432	2	9.7432	1.495	9.7432	-39.5825
9.7542	2	9.7542	1.675	9.7542	-39.7625
9.7653	2	9.7653	1.925	9.7653	-40.0125
9.7764	2	9.7764	2.266	9.7764	-40.3535
9.7875	2	9.7875	2.719	9.7875	-40.8065
9.7986	2	9.7986	3.305	9.7986	-41.3925
9.8096	2	9.8096	4.042	9.8096	-42.1295
9.8207	3	9.8207	4.944	9.8207	-42.0315
9.8318	4	9.8318	6.014	9.8318	-42.1015
9.8429	5	9.8429	7.244	9.8429	-42.3315
9.8539	7	9.8539	8.612	9.8539	-41.6995
9.865	9	9.865	10.078	9.865	-41.1655
9.8761	12	9.8761	11.587	9.8761	-39.6745
9.8872	15	9.8872	13.071	9.8872	-38.1585
9.8982	18	9.8982	14.451	9.8982	-36.5385
9.9093	20	9.9093	15.644	9.9093	-35.7315
9.9204	22	9.9204	16.574	9.9204	-34.6615
9.9315	22	9.9315	17.173	9.9315	-35.2605
9.9425	21	9.9425	17.398	9.9425	-36.4855
9.9536	19	9.9536	17.23	9.9536	-38.3175
9.9647	16	9.9647	16.695	9.9647	-40.7825
9.9758	14	9.9758	15.834	9.9758	-41.9215
9.9868	12	9.9868	14.718	9.9868	-42.8055
9.9979	10	9.9979	13.426	9.9979	-43.5135
10.009	8	10.009	12.046	10.009	-44.1335
10.0201	7	10.0201	10.656	10.0201	-43.7435
10.0311	7	10.0311	9.33	10.0311	-42.4175
10.0422	6	10.0422	8.12	10.0422	-42.2075
10.0533	6	10.0533	7.067	10.0533	-41.1545
10.0644	5	10.0644	6.19	10.0644	-41.2775
10.0755	5	10.0755	5.493	10.0755	-40.5805
10.0865	5	10.0865	4.965	10.0865	-40.0525
10.0976	5	10.0976	4.585	10.0976	-39.6725
10.1087	5	10.1087	4.327	10.1087	-39.4145
10.1198	4	10.1198	4.159	10.1198	-40.2465
10.1308	4	10.1308	4.053	10.1308	-40.1405
10.1419	4	10.1419	3.983	10.1419	-40.0705
10.153	4	10.153	3.926	10.153	-40.0135
10.1641	4	10.1641	3.868	10.1641	-39.9555
10.1751	4	10.1751	3.799	10.1751	-39.8865
10.1862	4	10.1862	3.716	10.1862	-39.8035
10.1973	4	10.1973	3.619	10.1973	-39.7065
10.2084	4	10.2084	3.511	10.2084	-39.5985
10.2194	4	10.2194	3.395	10.2194	-39.4825
10.2305	3	10.2305	3.279	10.2305	-40.3665
10.2416	3	10.2416	3.168	10.2416	-40.2555
10.2527	3	10.2527	3.066	10.2527	-40.1535
10.2637	3	10.2637	2.981	10.2637	-40.0685
10.2748	3	10.2748	2.915	10.2748	-40.0025
10.2859	3	10.2859	2.875	10.2859	-39.9625
10.297	3	10.297	2.862	10.297	-39.9495
10.308	2	10.308	2.882	10.308	-40.9695
10.3191	3	10.3191	2.933	10.3191	-40.0205
10.3302	3	10.3302	3.016	10.3302	-40.1035
10.3413	3	10.3413	3.128	10.3413	-40.2155
10.3524	3	10.3524	3.267	10.3524	-40.3545
10.3634	3	10.3634	3.426	10.3634	-40.5135
10.3745	4	10.3745	3.597	10.3745	-39.6845
10.3856	4	10.3856	3.772	10.3856	-39.8595
10.3967	4	10.3967	3.941	10.3967	-40.0285
10.4077	4	10.4077	4.095	10.4077	-40.1825
10.4188	5	10.4188	4.226	10.4188	-39.3135
10.4299	5	10.4299	4.328	10.4299	-39.4155
10.441	5	10.441	4.397	10.441	-39.4845
10.452	5	10.452	4.431	10.452	-39.5185
10.4631	4	10.4631	4.432	10.4631	-40.5195
10.4742	4	10.4742	4.404	10.4742	-40.4915
10.4853	4	10.4853	4.353	10.4853	-40.4405
10.4963	4	10.4963	4.285	10.4963	-40.3725
10.5074	4	10.5074	4.207	10.5074	-40.2945
10.5185	4	10.5185	4.127	10.5185	-40.2145
10.5296	4	10.5296	4.05	10.5296	-40.1375
10.5406	4	10.5406	3.981	10.5406	-40.0685
10.5517	4	10.5517	3.923	10.5517	-40.0105
10.5628	4	10.5628	3.878	10.5628	-39.9655
10.5739	4	10.5739	3.847	10.5739	-39.9345
10.5849	4	10.5849	3.83	10.5849	-39.9175
10.596	4	10.596	3.823	10.596	-39.9105
10.6071	4	10.6071	3.824	10.6071	-39.9115
10.6182	4	10.6182	3.828	10.6182	-39.9155
10.6293	4	10.6293	3.833	10.6293	-39.9205
10.6403	4	10.6403	3.833	10.6403	-39.9205
10.6514	4	10.6514	3.823	10.6514	-39.9105
10.6625	4	10.6625	3.8	10.6625	-39.8875
10.6736	4	10.6736	3.76	10.6736	-39.8475
10.6846	4	10.6846	3.699	10.6846	-39.7865
10.6957	3	10.6957	3.615	10.6957	-40.7025
10.7068	3	10.7068	3.508	10.7068	-40.5955
10.7179	3	10.7179	3.381	10.7179	-40.4685
10.7289	3	10.7289	3.236	10.7289	-40.3235
10.74	3	10.74	3.079	10.74	-40.1665
10.7511	3	10.7511	2.918	10.7511	-40.0055
10.7622	3	10.7622	2.758	10.7622	-39.8455
10.7732	3	10.7732	2.607	10.7732	-39.6945
10.7843	2	10.7843	2.472	10.7843	-40.5595
10.7954	2	10.7954	2.358	10.7954	-40.4455
10.8065	2	10.8065	2.271	10.8065	-40.3585
10.8175	3	10.8175	2.213	10.8175	-39.3005
10.8286	3	10.8286	2.185	10.8286	-39.2725
10.8397	3	10.8397	2.188	10.8397	-39.2755
10.8508	3	10.8508	2.22	10.8508	-39.3075
10.8618	2	10.8618	2.276	10.8618	-40.3635
10.8729	2	10.8729	2.351	10.8729	-40.4385
10.884	2	10.884	2.441	10.884	-40.5285
10.8951	3	10.8951	2.537	10.8951	-39.6245
10.9062	3	10.9062	2.634	10.9062	-39.7215
10.9172	3	10.9172	2.724	10.9172	-39.8115
10.9283	3	10.9283	2.802	10.9283	-39.8895
10.9394	3	10.9394	2.862	10.9394	-39.9495
10.9505	3	10.9505	2.901	10.9505	-39.9885
10.9615	3	10.9615	2.918	10.9615	-40.0055
10.9726	3	10.9726	2.913	10.9726	-40.0005
10.9837	3	10.9837	2.889	10.9837	-39.9765
10.9948	3	10.9948	2.848	10.9948	-39.9355
11.0058	2	11.0058	2.795	11.0058	-40.8825
11.0169	2	11.0169	2.736	11.0169	-40.8235
11.028	2	11.028	2.675	11.028	-40.7625
11.0391	2	11.0391	2.616	11.0391	-40.7035
11.0501	2	11.0501	2.563	11.0501	-40.6505
11.0612	2	11.0612	2.517	11.0612	-40.6045
11.0723	3	11.0723	2.479	11.0723	-39.5665
11.0834	3	11.0834	2.451	11.0834	-39.5385
11.0944	3	11.0944	2.43	11.0944	-39.5175
11.1055	3	11.1055	2.415	11.1055	-39.5025
11.1166	3	11.1166	2.404	11.1166	-39.4915
11.1277	3	11.1277	2.39	11.1277	-39.4775
11.1387	3	11.1387	2.38	11.1387	-39.4675
11.1498	2	11.1498	2.367	11.1498	-40.4545
11.1609	2	11.1609	2.351	11.1609	-40.4385
11.172	2	11.172	2.331	11.172	-40.4185
11.1831	2	11.1831	2.307	11.1831	-40.3945
11.1941	2	11.1941	2.281	11.1941	-40.3685
11.2052	2	11.2052	2.255	11.2052	-40.3425
11.2163	2	11.2163	2.231	11.2163	-40.3185
11.2274	2	11.2274	2.21	11.2274	-40.2975
11.2384	2	11.2384	2.195	11.2384	-40.2825
11.2495	3	11.2495	2.186	11.2495	-39.2735
11.2606	3	11.2606	2.184	11.2606	-39.2715
11.2717	3	11.2717	2.189	11.2717	-39.2765
11.2827	2	11.2827	2.201	11.2827	-40.2885
11.2938	2	11.2938	2.217	11.2938	-40.3045
11.3049	2	11.3049	2.236	11.3049	-40.3235
11.316	1	11.316	2.255	11.316	-41.3425
11.327	2	11.327	2.272	11.327	-40.3595
11.3381	2	11.3381	2.286	11.3381	-40.3735
11.3492	2	11.3492	2.294	11.3492	-40.3815
11.3603	3	11.3603	2.297	11.3603	-39.3845
11.3713	3	11.3713	2.293	11.3713	-39.3805
11.3824	3	11.3824	2.285	11.3824	-39.3725
11.3935	3	11.3935	2.274	11.3935	-39.3615
11.4046	3	11.4046	2.261	11.4046	-39.3485
11.4156	2	11.4156	2.249	11.4156	-40.3365
11.4267	2	11.4267	2.239	11.4267	-40.3265
11.4378	2	11.4378	2.234	11.4378	-40.3215
11.4489	2	11.4489	2.234	11.4489	-40.3215
11.46	2	11.46	2.239	11.46	-40.3265
11.471	2	11.471	2.251	11.471	-40.3385
11.4821	2	11.4821	2.268	11.4821	-40.3555
11.4932	2	11.4932	2.29	11.4932	-40.3775
11.5043	2	11.5043	2.314	11.5043	-40.4015
11.5153	2	11.5153	2.339	11.5153	-40.4265
11.5264	2	11.5264	2.363	11.5264	-40.4505
11.5375	2	11.5375	2.382	11.5375	-40.4695
11.5486	3	11.5486	2.394	11.5486	-39.4815
11.5596	3	11.5596	2.399	11.5596	-39.4865
11.5707	2	11.5707	2.395	11.5707	-40.4825
11.5818	2	11.5818	2.382	11.5818	-40.4695
11.5929	3	11.5929	2.362	11.5929	-39.4495
11.6039	3	11.6039	2.336	11.6039	-39.4235
11.615	3	11.615	2.307	11.615	-39.3945
11.6261	3	11.6261	2.278	11.6261	-39.3655
11.6372	2	11.6372	2.253	11.6372	-40.3405
11.6482	2	11.6482	2.234	11.6482	-40.3215
11.6593	2	11.6593	2.225	11.6593	-40.3125
11.6704	2	11.6704	2.229	11.6704	-40.3165
11.6815	3	11.6815	2.249	11.6815	-39.3365
11.6925	3	11.6925	2.287	11.6925	-39.3745
11.7036	2	11.7036	2.343	11.7036	-40.4305
11.7147	2	11.7147	2.418	11.7147	-40.5055
11.7258	2	11.7258	2.511	11.7258	-40.5985
11.7369	3	11.7369	2.621	11.7369	-39.7085
11.7479	3	11.7479	2.745	11.7479	-39.8325
11.759	3	11.759	2.879	11.759	-39.9665
11.7701	3	11.7701	3.018	11.7701	-40.1055
11.7812	4	11.7812	3.157	11.7812	-39.2445
11.7922	3	11.7922	3.292	11.7922	-40.3795
11.8033	3	11.8033	3.416	11.8033	-40.5035
11.8144	3	11.8144	3.522	11.8144	-40.6095
11.8255	3	11.8255	3.608	11.8255	-40.6955
11.8365	3	11.8365	3.666	11.8365	-40.7535
11.8476	3	11.8476	3.694	11.8476	-40.7815
11.8587	3	11.8587	3.69	11.8587	-40.7775
11.8698	3	11.8698	3.652	11.8698	-40.7395
11.8808	3	11.8808	3.583	11.8808	-40.6705
11.8919	3	11.8919	3.485	11.8919	-40.5725
11.903	3	11.903	3.361	11.903	-40.4485
11.9141	3	11.9141	3.217	11.9141	-40.3045
11.9251	3	11.9251	3.059	11.9251	-40.1465
11.9362	3	11.9362	2.891	11.9362	-39.9785
11.9473	3	11.9473	2.72	11.9473	-39.8075
11.9584	3	11.9584	2.552	11.9584	-39.6395
11.9694	3	11.9694	2.391	11.9694	-39.4785
11.9805	3	11.9805	2.243	11.9805	-39.3305
11.9916	3	11.9916	2.11	11.9916	-39.1975
12.0027	3	12.0027	1.997	12.0027	-39.0845
12.0138	3	12.0138	1.903	12.0138	-38.9905
12.0248	3	12.0248	1.832	12.0248	-38.9195
12.0359	3	12.0359	1.782	12.0359	-38.8695
12.047	2	12.047	1.756	12.047	-39.8435
12.0581	2	12.0581	1.751	12.0581	-39.8385
12.0691	2	12.0691	1.767	12.0691	-39.8545
12.0802	2	12.0802	1.802	12.0802	-39.8895
12.0913	2	12.0913	1.855	12.0913	-39.9425
12.1024	3	12.1024	1.923	12.1024	-39.0105
12.1134	3	12.1134	2.005	12.1134	-39.0925
12.1245	2	12.1245	2.097	12.1245	-40.1845
12.1356	2	12.1356	2.199	12.1356	-40.2865
12.1467	2	12.1467	2.307	12.1467	-40.3945
12.1577	2	12.1577	2.418	12.1577	-40.5055
12.1688	2	12.1688	2.532	12.1688	-40.6195
12.1799	2	12.1799	2.645	12.1799	-40.7325
12.191	2	12.191	2.755	12.191	-40.8425
12.202	2	12.202	2.861	12.202	-40.9485
12.2131	3	12.2131	2.961	12.2131	-40.0485
12.2242	2	12.2242	3.053	12.2242	-41.1405
12.2353	3	12.2353	3.135	12.2353	-40.2225
12.2463	3	12.2463	3.208	12.2463	-40.2955
12.2574	3	12.2574	3.269	12.2574	-40.3565
12.2685	3	12.2685	3.318	12.2685	-40.4055
12.2796	3	12.2796	3.354	12.2796	-40.4415
12.2907	3	12.2907	3.376	12.2907	-40.4635
12.3017	4	12.3017	3.383	12.3017	-39.4705
12.3128	4	12.3128	3.375	12.3128	-39.4625
12.3239	4	12.3239	3.351	12.3239	-39.4385
12.335	4	12.335	3.312	12.335	-39.3995
12.346	4	12.346	3.259	12.346	-39.3465
12.3571	4	12.3571	3.195	12.3571	-39.2825
12.3682	4	12.3682	3.121	12.3682	-39.2085
12.3793	4	12.3793	3.041	12.3793	-39.1285
12.3903	4	12.3903	2.959	12.3903	-39.0465
12.4014	3	12.4014	2.878	12.4014	-39.9655
12.4125	2	12.4125	2.803	12.4125	-40.8905
12.4236	2	12.4236	2.739	12.4236	-40.8265
12.4346	2	12.4346	2.688	12.4346	-40.7755
12.4457	2	12.4457	2.656	12.4457	-40.7435
12.4568	2	12.4568	2.646	12.4568	-40.7335
12.4679	2	12.4679	2.661	12.4679	-40.7485
12.4789	3	12.4789	2.703	12.4789	-39.7905
12.49	3	12.49	2.774	12.49	-39.8615
12.5011	3	12.5011	2.873	12.5011	-39.9605
12.5122	3	12.5122	3.001	12.5122	-40.0885
12.5232	4	12.5232	3.155	12.5232	-39.2425
12.5343	4	12.5343	3.335	12.5343	-39.4225
12.5454	4	12.5454	3.535	12.5454	-39.6225
12.5565	4	12.5565	3.753	12.5565	-39.8405
12.5676	4	12.5676	3.982	12.5676	-40.0695
12.5786	4	12.5786	4.218	12.5786	-40.3055
12.5897	4	12.5897	4.454	12.5897	-40.5415
12.6008	5	12.6008	4.684	12.6008	-39.7715
12.6119	5	12.6119	4.903	12.6119	-39.9905
12.6229	5	12.6229	5.105	12.6229	-40.1925
12.634	5	12.634	5.285	12.634	-40.3725
12.6451	5	12.6451	5.438	12.6451	-40.5255
12.6562	6	12.6562	5.563	12.6562	-39.6505
12.6672	6	12.6672	5.657	12.6672	-39.7445
12.6783	6	12.6783	5.721	12.6783	-39.8085
12.6894	6	12.6894	5.754	12.6894	-39.8415
12.7005	6	12.7005	5.76	12.7005	-39.8475
12.7115	6	12.7115	5.742	12.7115	-39.8295
12.7226	6	12.7226	5.703	12.7226	-39.7905
12.7337	6	12.7337	5.649	12.7337	-39.7365
12.7448	6	12.7448	5.585	12.7448	-39.6725
12.7558	6	12.7558	5.515	12.7558	-39.6025
12.7669	6	12.7669	5.445	12.7669	-39.5325
12.778	6	12.778	5.378	12.778	-39.4655
12.7891	5	12.7891	5.318	12.7891	-40.4055
12.8001	5	12.8001	5.268	12.8001	-40.3555
12.8112	5	12.8112	5.227	12.8112	-40.3145
12.8223	5	12.8223	5.198	12.8223	-40.2855
12.8334	5	12.8334	5.18	12.8334	-40.2675
12.8445	5	12.8445	5.172	12.8445	-40.2595
12.8555	5	12.8555	5.173	12.8555	-40.2605
12.8666	5	12.8666	5.18	12.8666	-40.2675
12.8777	5	12.8777	5.192	12.8777	-40.2795
12.8888	5	12.8888	5.207	12.8888	-40.2945
12.8998	6	12.8998	5.225	12.8998	-39.3125
12.9109	6	12.9109	5.244	12.9109	-39.3315
12.922	6	12.922	5.265	12.922	-39.3525
12.9331	6	12.9331	5.288	12.9331	-39.3755
12.9441	6	12.9441	5.317	12.9441	-39.4045
12.9552	5	12.9552	5.351	12.9552	-40.4385
12.9663	6	12.9663	5.394	12.9663	-39.4815
12.9774	5	12.9774	5.447	12.9774	-40.5345
12.9884	5	12.9884	5.514	12.9884	-40.6015
12.9995	5	12.9995	5.595	12.9995	-40.6825
13.0106	6	13.0106	5.693	13.0106	-39.7805
13.0217	6	13.0217	5.809	13.0217	-39.8965
13.0327	6	13.0327	5.944	13.0327	-40.0315
13.0438	6	13.0438	6.098	13.0438	-40.1855
13.0549	7	13.0549	6.272	13.0549	-39.3595
13.066	7	13.066	6.464	13.066	-39.5515
13.077	8	13.077	6.675	13.077	-38.7625
13.0881	8	13.0881	6.904	13.0881	-38.9915
13.0992	9	13.0992	7.148	13.0992	-38.2355
13.1103	8	13.1103	7.408	13.1103	-39.4955
13.1214	8	13.1214	7.68	13.1214	-39.7675
13.1324	8	13.1324	7.964	13.1324	-40.0515
13.1435	8	13.1435	8.257	13.1435	-40.3445
13.1546	8	13.1546	8.556	13.1546	-40.6435
13.1657	8	13.1657	8.857	13.1657	-40.9445
13.1767	8	13.1767	9.156	13.1767	-41.2435
13.1878	8	13.1878	9.45	13.1878	-41.5375
13.1989	8	13.1989	9.73	13.1989	-41.8175
13.21	9	13.21	9.994	13.21	-41.0815
13.221	10	13.221	10.233	13.221	-40.3205
13.2321	10	13.2321	10.441	13.2321	-40.5285
13.2432	11	13.2432	10.614	13.2432	-39.7015
13.2543	11	13.2543	10.745	13.2543	-39.8325
13.2653	13	13.2653	10.832	13.2653	-37.9195
13.2764	13	13.2764	10.87	13.2764	-37.9575
13.2875	14	13.2875	10.86	13.2875	-36.9475
13.2986	13	13.2986	10.803	13.2986	-37.8905
13.3096	13	13.3096	10.701	13.3096	-37.7885
13.3207	12	13.3207	10.557	13.3207	-38.6445
13.3318	11	13.3318	10.378	13.3318	-39.4655
13.3429	10	13.3429	10.171	13.3429	-40.2585
13.3539	9	13.3539	9.941	13.3539	-41.0285
13.365	9	13.365	9.696	13.365	-40.7835
13.3761	8	13.3761	9.444	13.3761	-41.5315
13.3872	9	13.3872	9.192	13.3872	-40.2795
13.3983	9	13.3983	8.946	13.3983	-40.0335
13.4093	9	13.4093	8.715	13.4093	-39.8025
13.4204	9	13.4204	8.502	13.4204	-39.5895
13.4315	9	13.4315	8.315	13.4315	-39.4025
13.4426	9	13.4426	8.157	13.4426	-39.2445
13.4536	8	13.4536	8.032	13.4536	-40.1195
13.4647	8	13.4647	7.943	13.4647	-40.0305
13.4758	8	13.4758	7.892	13.4758	-39.9795
13.4869	8	13.4869	7.88	13.4869	-39.9675
13.4979	8	13.4979	7.907	13.4979	-39.9945
13.509	8	13.509	7.971	13.509	-40.0585
13.5201	8	13.5201	8.07	13.5201	-40.1575
13.5312	8	13.5312	8.203	13.5312	-40.2905
13.5422	8	13.5422	8.365	13.5422	-40.4525
13.5533	9	13.5533	8.553	13.5533	-39.6405
13.5644	9	13.5644	8.762	13.5644	-39.8495
13.5755	10	13.5755	8.987	13.5755	-39.0745
13.5865	10	13.5865	9.222	13.5865	-39.3095
13.5976	10	13.5976	9.462	13.5976	-39.5495
13.6087	10	13.6087	9.701	13.6087	-39.7885
13.6198	10	13.6198	9.931	13.6198	-40.0185
13.6308	11	13.6308	10.148	13.6308	-39.2355
13.6419	12	13.6419	10.344	13.6419	-38.4315
13.653	12	13.653	10.515	13.653	-38.6025
13.6641	12	13.6641	10.654	13.6641	-38.7415
13.6752	11	13.6752	10.758	13.6752	-39.8455
13.6862	11	13.6862	10.824	13.6862	-39.9115
13.6973	11	13.6973	10.848	13.6973	-39.9355
13.7084	11	13.7084	10.83	13.7084	-39.9175
13.7195	11	13.7195	10.771	13.7195	-39.8585
13.7305	11	13.7305	10.673	13.7305	-39.7605
13.7416	11	13.7416	10.538	13.7416	-39.6255
13.7527	11	13.7527	10.371	13.7527	-39.4585
13.7638	10	13.7638	10.176	13.7638	-40.2635
13.7748	10	13.7748	9.961	13.7748	-40.0485
13.7859	10	13.7859	9.73	13.7859	-39.8175
13.797	9	13.797	9.493	13.797	-40.5805
13.8081	9	13.8081	9.254	13.8081	-40.3415
13.8191	9	13.8191	9.02	13.8191	-40.1075
13.8302	9	13.8302	8.798	13.8302	-39.8855
13.8413	8	13.8413	8.592	13.8413	-40.6795
13.8524	8	13.8524	8.406	13.8524	-40.4935
13.8634	8	13.8634	8.243	13.8634	-40.3305
13.8745	7	13.8745	8.103	13.8745	-41.1905
13.8856	8	13.8856	7.987	13.8856	-40.0745
13.8967	8	13.8967	7.894	13.8967	-39.9815
13.9077	8	13.9077	7.819	13.9077	-39.9065
13.9188	8	13.9188	7.761	13.9188	-39.8485
13.9299	9	13.9299	7.714	13.9299	-38.8015
13.941	10	13.941	7.672	13.941	-37.7595
13.9521	10	13.9521	7.631	13.9521	-37.7185
13.9631	10	13.9631	7.584	13.9631	-37.6715
13.9742	10	13.9742	7.527	13.9742	-37.6145
13.9853	9	13.9853	7.454	13.9853	-38.5415
13.9964	9	13.9964	7.361	13.9964	-38.4485
14.0074	8	14.0074	7.247	14.0074	-39.3345
14.0185	8	14.0185	7.109	14.0185	-39.1965
14.0296	7	14.0296	6.948	14.0296	-40.0355
14.0407	7	14.0407	6.765	14.0407	-39.8525
14.0517	6	14.0517	6.561	14.0517	-40.6485
14.0628	6	14.0628	6.342	14.0628	-40.4295
14.0739	6	14.0739	6.111	14.0739	-40.1985
14.085	6	14.085	5.872	14.085	-39.9595
14.096	5	14.096	5.632	14.096	-40.7195
14.1071	5	14.1071	5.396	14.1071	-40.4835
14.1182	4	14.1182	5.169	14.1182	-41.2565
14.1293	4	14.1293	4.956	14.1293	-41.0435
14.1403	4	14.1403	4.761	14.1403	-40.8485
14.1514	3	14.1514	4.589	14.1514	-41.6765
14.1625	3	14.1625	4.444	14.1625	-41.5315
14.1736	4	14.1736	4.326	14.1736	-40.4135
14.1846	4	14.1846	4.239	14.1846	-40.3265
14.1957	4	14.1957	4.182	14.1957	-40.2695
14.2068	4	14.2068	4.156	14.2068	-40.2435
14.2179	5	14.2179	4.159	14.2179	-39.2465
14.229	6	14.229	4.189	14.229	-38.2765
14.24	5	14.24	4.243	14.24	-39.3305
14.2511	5	14.2511	4.318	14.2511	-39.4055
14.2622	4	14.2622	4.409	14.2622	-40.4965
14.2733	4	14.2733	4.512	14.2733	-40.5995
14.2843	4	14.2843	4.623	14.2843	-40.7105
14.2954	4	14.2954	4.735	14.2954	-40.8225
14.3065	4	14.3065	4.845	14.3065	-40.9325
14.3176	4	14.3176	4.946	14.3176	-41.0335
14.3286	4	14.3286	5.035	14.3286	-41.1225
14.3397	4	14.3397	5.107	14.3397	-41.1945
14.3508	4	14.3508	5.159	14.3508	-41.2465
14.3619	5	14.3619	5.187	14.3619	-40.2745
14.3729	5	14.3729	5.19	14.3729	-40.2775
14.384	6	14.384	5.166	14.384	-39.2535
14.3951	6	14.3951	5.115	14.3951	-39.2025
14.4062	6	14.4062	5.036	14.4062	-39.1235
14.4172	6	14.4172	4.932	14.4172	-39.0195
14.4283	6	14.4283	4.804	14.4283	-38.8915
14.4394	7	14.4394	4.655	14.4394	-37.7425
14.4505	7	14.4505	4.487	14.4505	-37.5745
14.4615	7	14.4615	4.303	14.4615	-37.3905
14.4726	7	14.4726	4.108	14.4726	-37.1955
14.4837	6	14.4837	3.904	14.4837	-37.9915
14.4948	5	14.4948	3.695	14.4948	-38.7825
14.5059	5	14.5059	3.485	14.5059	-38.5725
14.5169	4	14.5169	3.275	14.5169	-39.3625
14.528	3	14.528	3.07	14.528	-40.1575
14.5391	3	14.5391	2.871	14.5391	-39.9585
14.5502	2	14.5502	2.68	14.5502	-40.7675
14.5612	2	14.5612	2.5	14.5612	-40.5875
14.5723	2	14.5723	2.331	14.5723	-40.4185
14.5834	1	14.5834	2.174	14.5834	-41.2615
14.5945	1	14.5945	2.03	14.5945	-41.1175
14.6055	1	14.6055	1.9	14.6055	-40.9875
14.6166	1	14.6166	1.782	14.6166	-40.8695
14.6277	1	14.6277	1.677	14.6277	-40.7645
14.6388	1	14.6388	1.584	14.6388	-40.6715
14.6498	1	14.6498	1.503	14.6498	-40.5905
14.6609	1	14.6609	1.432	14.6609	-40.5195
14.672	1	14.672	1.371	14.672	-40.4585
14.6831	1	14.6831	1.318	14.6831	-40.4055
14.6941	1	14.6941	1.274	14.6941	-40.3615
14.7052	1	14.7052	1.236	14.7052	-40.3235
14.7163	1	14.7163	1.205	14.7163	-40.2925
14.7274	1	14.7274	1.179	14.7274	-40.2665
14.7384	1	14.7384	1.158	14.7384	-40.2455
14.7495	1	14.7495	1.14	14.7495	-40.2275
14.7606	1	14.7606	1.126	14.7606	-40.2135
14.7717	1	14.7717	1.114	14.7717	-40.2015
14.7828	1	14.7828	1.104	14.7828	-40.1915
14.7938	1	14.7938	1.097	14.7938	-40.1845
14.8049	1	14.8049	1.09	14.8049	-40.1775
14.816	1	14.816	1.085	14.816	-40.1725
14.8271	1	14.8271	1.081	14.8271	-40.1685
14.8381	1	14.8381	1.078	14.8381	-40.1655
14.8492	1	14.8492	1.075	14.8492	-40.1625
14.8603	1	14.8603	1.073	14.8603	-40.1605
14.8714	1	14.8714	1.071	14.8714	-40.1585
14.8824	1	14.8824	1.07	14.8824	-40.1575
14.8935	1	14.8935	1.069	14.8935	-40.1565
14.9046	1	14.9046	1.067	14.9046	-40.1545
14.9157	1	14.9157	1.067	14.9157	-40.1545
14.9267	1	14.9267	1.066	14.9267	-40.1535
14.9378	1	14.9378	1.065	14.9378	-40.1525
14.9489	1	14.9489	1.065	14.9489	-40.1525
14.96	1	14.96	1.065	14.96	-40.1525
14.971	1	14.971	1.064	14.971	-40.1515
14.9821	1	14.9821	1.065	14.9821	-40.1525
14.9932	1	14.9932	1.065	14.9932	-40.1525
15.0043	1	15.0043	1.065	15.0043	-40.1525
15.0153	1	15.0153	1.066	15.0153	-40.1535
15.0264	1	15.0264	1.067	15.0264	-40.1545
15.0375	1	15.0375	1.068	15.0375	-40.1555
15.0486	1	15.0486	1.07	15.0486	-40.1575
15.0597	1	15.0597	1.073	15.0597	-40.1605
15.0707	1	15.0707	1.076	15.0707	-40.1635
15.0818	1	15.0818	1.079	15.0818	-40.1665
15.0929	1	15.0929	1.084	15.0929	-40.1715
15.104	1	15.104	1.09	15.104	-40.1775
15.115	1	15.115	1.096	15.115	-40.1835
15.1261	1	15.1261	1.104	15.1261	-40.1915
15.1372	1	15.1372	1.115	15.1372	-40.2025
15.1483	1	15.1483	1.126	15.1483	-40.2135
15.1593	1	15.1593	1.141	15.1593	-40.2285
15.1704	1	15.1704	1.159	15.1704	-40.2465
15.1815	2	15.1815	1.18	15.1815	-39.2675
15.1926	2	15.1926	1.205	15.1926	-39.2925
15.2036	1	15.2036	1.234	15.2036	-40.3215
15.2147	2	15.2147	1.268	15.2147	-39.3555
15.2258	1	15.2258	1.307	15.2258	-40.3945
15.2369	1	15.2369	1.351	15.2369	-40.4385
15.2479	1	15.2479	1.402	15.2479	-40.4895
15.259	1	15.259	1.46	15.259	-40.5475
15.2701	1	15.2701	1.524	15.2701	-40.6115
15.2812	1	15.2812	1.596	15.2812	-40.6835
15.2922	2	15.2922	1.676	15.2922	-39.7635
15.3033	2	15.3033	1.765	15.3033	-39.8525
15.3144	2	15.3144	1.861	15.3144	-39.9485
15.3255	2	15.3255	1.965	15.3255	-40.0525
15.3366	1	15.3366	2.078	15.3366	-41.1655
15.3476	1	15.3476	2.199	15.3476	-41.2865
15.3587	1	15.3587	2.326	15.3587	-41.4135
15.3698	1	15.3698	2.461	15.3698	-41.5485
15.3809	1	15.3809	2.601	15.3809	-41.6885
15.3919	2	15.3919	2.746	15.3919	-40.8335
15.403	2	15.403	2.895	15.403	-40.9825
15.4141	3	15.4141	3.046	15.4141	-40.1335
15.4252	3	15.4252	3.197	15.4252	-40.2845
15.4362	4	15.4362	3.347	15.4362	-39.4345
15.4473	4	15.4473	3.495	15.4473	-39.5825
15.4584	5	15.4584	3.638	15.4584	-38.7255
15.4695	5	15.4695	3.774	15.4695	-38.8615
15.4805	6	15.4805	3.902	15.4805	-37.9895
15.4916	6	15.4916	4.019	15.4916	-38.1065
15.5027	7	15.5027	4.125	15.5027	-37.2125
15.5138	7	15.5138	4.216	15.5138	-37.3035
15.5248	7	15.5248	4.292	15.5248	-37.3795
15.5359	7	15.5359	4.352	15.5359	-37.4395
15.547	6	15.547	4.395	15.547	-38.4825
15.5581	6	15.5581	4.419	15.5581	-38.5065
15.5691	6	15.5691	4.425	15.5691	-38.5125
15.5802	5	15.5802	4.412	15.5802	-39.4995
15.5913	5	15.5913	4.382	15.5913	-39.4695
15.6024	4	15.6024	4.334	15.6024	-40.4215
15.6135	4	15.6135	4.269	15.6135	-40.3565
15.6245	3	15.6245	4.188	15.6245	-41.2755
15.6356	3	15.6356	4.093	15.6356	-41.1805
15.6467	3	15.6467	3.986	15.6467	-41.0735
15.6578	3	15.6578	3.868	15.6578	-40.9555
15.6688	2	15.6688	3.74	15.6688	-41.8275
15.6799	2	15.6799	3.605	15.6799	-41.6925
15.691	2	15.691	3.464	15.691	-41.5515
15.7021	2	15.7021	3.32	15.7021	-41.4075
15.7131	2	15.7131	3.173	15.7131	-41.2605
15.7242	2	15.7242	3.026	15.7242	-41.1135
15.7353	2	15.7353	2.88	15.7353	-40.9675
15.7464	2	15.7464	2.737	15.7464	-40.8245
15.7574	2	15.7574	2.597	15.7574	-40.6845
15.7685	3	15.7685	2.462	15.7685	-39.5495
15.7796	3	15.7796	2.333	15.7796	-39.4205
15.7907	3	15.7907	2.211	15.7907	-39.2985
15.8017	3	15.8017	2.095	15.8017	-39.1825
15.8128	3	15.8128	1.987	15.8128	-39.0745
15.8239	2	15.8239	1.886	15.8239	-39.9735
15.835	2	15.835	1.793	15.835	-39.8805
15.846	2	15.846	1.709	15.846	-39.7965
15.8571	2	15.8571	1.631	15.8571	-39.7185
15.8682	2	15.8682	1.562	15.8682	-39.6495
15.8793	2	15.8793	1.5	15.8793	-39.5875
15.8904	2	15.8904	1.444	15.8904	-39.5315
15.9014	2	15.9014	1.396	15.9014	-39.4835
15.9125	2	15.9125	1.354	15.9125	-39.4415
15.9236	1	15.9236	1.318	15.9236	-40.4055
15.9347	1	15.9347	1.288	15.9347	-40.3755
15.9457	1	15.9457	1.263	15.9457	-40.3505
15.9568	1	15.9568	1.243	15.9568	-40.3305
15.9679	1	15.9679	1.228	15.9679	-40.3155
15.979	2	15.979	1.218	15.979	-39.3055
15.99	1	15.99	1.212	15.99	-40.2995
16.0011	1	16.0011	1.211	16.0011	-40.2985
16.0122	1	16.0122	1.212	16.0122	-40.2995
16.0233	1	16.0233	1.219	16.0233	-40.3065
16.0343	1	16.0343	1.23	16.0343	-40.3175
16.0454	1	16.0454	1.244	16.0454	-40.3315
16.0565	1	16.0565	1.264	16.0565	-40.3515
16.0676	1	16.0676	1.287	16.0676	-40.3745
16.0786	1	16.0786	1.314	16.0786	-40.4015
16.0897	1	16.0897	1.346	16.0897	-40.4335
16.1008	1	16.1008	1.382	16.1008	-40.4695
16.1119	1	16.1119	1.422	16.1119	-40.5095
16.1229	1	16.1229	1.467	16.1229	-40.5545
16.134	1	16.134	1.516	16.134	-40.6035
16.1451	1	16.1451	1.57	16.1451	-40.6575
16.1562	1	16.1562	1.628	16.1562	-40.7155
16.1673	2	16.1673	1.69	16.1673	-39.7775
16.1783	2	16.1783	1.757	16.1783	-39.8445
16.1894	2	16.1894	1.828	16.1894	-39.9155
16.2005	3	16.2005	1.902	16.2005	-38.9895
16.2116	3	16.2116	1.98	16.2116	-39.0675
16.2226	3	16.2226	2.061	16.2226	-39.1485
16.2337	3	16.2337	2.145	16.2337	-39.2325
16.2448	3	16.2448	2.231	16.2448	-39.3185
16.2559	3	16.2559	2.318	16.2559	-39.4055
16.2669	3	16.2669	2.406	16.2669	-39.4935
16.278	3	16.278	2.495	16.278	-39.5825
16.2891	3	16.2891	2.583	16.2891	-39.6705
16.3002	3	16.3002	2.67	16.3002	-39.7575
16.3112	3	16.3112	2.754	16.3112	-39.8415
16.3223	3	16.3223	2.836	16.3223	-39.9235
16.3334	3	16.3334	2.915	16.3334	-40.0025
16.3445	3	16.3445	2.989	16.3445	-40.0765
16.3555	3	16.3555	3.058	16.3555	-40.1455
16.3666	3	16.3666	3.122	16.3666	-40.2095
16.3777	3	16.3777	3.179	16.3777	-40.2665
16.3888	3	16.3888	3.229	16.3888	-40.3165
16.3998	3	16.3998	3.272	16.3998	-40.3595
16.4109	3	16.4109	3.308	16.4109	-40.3955
16.422	3	16.422	3.335	16.422	-40.4225
16.4331	3	16.4331	3.354	16.4331	-40.4415
16.4442	3	16.4442	3.365	16.4442	-40.4525
16.4552	3	16.4552	3.366	16.4552	-40.4535
16.4663	4	16.4663	3.359	16.4663	-39.4465
16.4774	4	16.4774	3.344	16.4774	-39.4315
16.4885	3	16.4885	3.321	16.4885	-40.4085
16.4995	3	16.4995	3.29	16.4995	-40.3775
16.5106	3	16.5106	3.251	16.5106	-40.3385
16.5217	3	16.5217	3.204	16.5217	-40.2915
16.5328	4	16.5328	3.151	16.5328	-39.2385
16.5438	4	16.5438	3.091	16.5438	-39.1785
16.5549	4	16.5549	3.026	16.5549	-39.1135
16.566	3	16.566	2.955	16.566	-40.0425
16.5771	3	16.5771	2.88	16.5771	-39.9675
16.5881	3	16.5881	2.802	16.5881	-39.8895
16.5992	3	16.5992	2.721	16.5992	-39.8085
16.6103	3	16.6103	2.637	16.6103	-39.7245
16.6214	3	16.6214	2.552	16.6214	-39.6395
16.6324	3	16.6324	2.467	16.6324	-39.5545
16.6435	2	16.6435	2.382	16.6435	-40.4695
16.6546	2	16.6546	2.297	16.6546	-40.3845
16.6657	2	16.6657	2.214	16.6657	-40.3015
16.6767	2	16.6767	2.133	16.6767	-40.2205
16.6878	2	16.6878	2.054	16.6878	-40.1415
16.6989	2	16.6989	1.978	16.6989	-40.0655
16.71	2	16.71	1.906	16.71	-39.9935
16.7211	2	16.7211	1.837	16.7211	-39.9245
16.7321	3	16.7321	1.772	16.7321	-38.8595
16.7432	2	16.7432	1.711	16.7432	-39.7985
16.7543	2	16.7543	1.655	16.7543	-39.7425
16.7654	2	16.7654	1.603	16.7654	-39.6905
16.7764	2	16.7764	1.555	16.7764	-39.6425
16.7875	1	16.7875	1.513	16.7875	-40.6005
16.7986	1	16.7986	1.474	16.7986	-40.5615
16.8097	1	16.8097	1.44	16.8097	-40.5275
16.8207	1	16.8207	1.41	16.8207	-40.4975
16.8318	1	16.8318	1.384	16.8318	-40.4715
16.8429	1	16.8429	1.362	16.8429	-40.4495
16.854	1	16.854	1.343	16.854	-40.4305
16.865	1	16.865	1.328	16.865	-40.4155
16.8761	1	16.8761	1.316	16.8761	-40.4035
16.8872	1	16.8872	1.307	16.8872	-40.3945
16.8983	1	16.8983	1.301	16.8983	-40.3885
16.9093	1	16.9093	1.297	16.9093	-40.3845
16.9204	1	16.9204	1.295	16.9204	-40.3825
16.9315	2	16.9315	1.295	16.9315	-39.3825
16.9426	2	16.9426	1.297	16.9426	-39.3845
16.9536	2	16.9536	1.3	16.9536	-39.3875
16.9647	2	16.9647	1.304	16.9647	-39.3915
16.9758	2	16.9758	1.31	16.9758	-39.3975
16.9869	2	16.9869	1.316	16.9869	-39.4035
16.998	2	16.998	1.323	16.998	-39.4105
17.009	1	17.009	1.33	17.009	-40.4175
17.0201	1	17.0201	1.337	17.0201	-40.4245
17.0312	1	17.0312	1.345	17.0312	-40.4325
17.0423	1	17.0423	1.352	17.0423	-40.4395
17.0533	1	17.0533	1.36	17.0533	-40.4475
17.0644	1	17.0644	1.367	17.0644	-40.4545
17.0755	1	17.0755	1.374	17.0755	-40.4615
17.0866	1	17.0866	1.381	17.0866	-40.4685
17.0976	1	17.0976	1.387	17.0976	-40.4745
17.1087	2	17.1087	1.393	17.1087	-39.4805
17.1198	2	17.1198	1.399	17.1198	-39.4865
17.1309	2	17.1309	1.404	17.1309	-39.4915
17.1419	1	17.1419	1.409	17.1419	-40.4965
17.153	2	17.153	1.413	17.153	-39.5005
17.1641	2	17.1641	1.417	17.1641	-39.5045
17.1752	2	17.1752	1.421	17.1752	-39.5085
17.1862	2	17.1862	1.425	17.1862	-39.5125
17.1973	2	17.1973	1.428	17.1973	-39.5155
17.2084	1	17.2084	1.432	17.2084	-40.5195
17.2195	1	17.2195	1.435	17.2195	-40.5225
17.2305	1	17.2305	1.438	17.2305	-40.5255
17.2416	1	17.2416	1.441	17.2416	-40.5285
17.2527	1	17.2527	1.444	17.2527	-40.5315
17.2638	1	17.2638	1.447	17.2638	-40.5345
17.2749	1	17.2749	1.45	17.2749	-40.5375
17.2859	1	17.2859	1.453	17.2859	-40.5405
17.297	1	17.297	1.456	17.297	-40.5435
17.3081	1	17.3081	1.459	17.3081	-40.5465
17.3192	1	17.3192	1.461	17.3192	-40.5485
17.3302	1	17.3302	1.463	17.3302	-40.5505
17.3413	2	17.3413	1.464	17.3413	-39.5515
17.3524	2	17.3524	1.465	17.3524	-39.5525
17.3635	2	17.3635	1.466	17.3635	-39.5535
17.3745	1	17.3745	1.465	17.3745	-40.5525
17.3856	2	17.3856	1.464	17.3856	-39.5515
17.3967	2	17.3967	1.463	17.3967	-39.5505
17.4078	2	17.4078	1.46	17.4078	-39.5475
17.4188	2	17.4188	1.456	17.4188	-39.5435
17.4299	1	17.4299	1.452	17.4299	-40.5395
17.441	1	17.441	1.446	17.441	-40.5335
17.4521	1	17.4521	1.439	17.4521	-40.5265
17.4631	1	17.4631	1.432	17.4631	-40.5195
17.4742	1	17.4742	1.423	17.4742	-40.5105
17.4853	1	17.4853	1.413	17.4853	-40.5005
17.4964	1	17.4964	1.403	17.4964	-40.4905
17.5074	1	17.5074	1.392	17.5074	-40.4795
17.5185	1	17.5185	1.38	17.5185	-40.4675
17.5296	2	17.5296	1.367	17.5296	-39.4545
17.5407	2	17.5407	1.354	17.5407	-39.4415
17.5518	2	17.5518	1.34	17.5518	-39.4275
17.5628	2	17.5628	1.326	17.5628	-39.4135
17.5739	2	17.5739	1.311	17.5739	-39.3985
17.585	2	17.585	1.297	17.585	-39.3845
17.5961	2	17.5961	1.282	17.5961	-39.3695
17.6071	2	17.6071	1.267	17.6071	-39.3545
17.6182	2	17.6182	1.253	17.6182	-39.3405
17.6293	2	17.6293	1.238	17.6293	-39.3255
17.6404	1	17.6404	1.224	17.6404	-40.3115
17.6514	1	17.6514	1.21	17.6514	-40.2975
17.6625	1	17.6625	1.196	17.6625	-40.2835
17.6736	1	17.6736	1.183	17.6736	-40.2705
17.6847	1	17.6847	1.171	17.6847	-40.2585
17.6957	1	17.6957	1.159	17.6957	-40.2465
17.7068	1	17.7068	1.147	17.7068	-40.2345
17.7179	1	17.7179	1.137	17.7179	-40.2245
17.729	1	17.729	1.126	17.729	-40.2135
17.74	1	17.74	1.117	17.74	-40.2045
17.7511	1	17.7511	1.108	17.7511	-40.1955
17.7622	1	17.7622	1.099	17.7622	-40.1865
17.7733	1	17.7733	1.092	17.7733	-40.1795
17.7843	1	17.7843	1.085	17.7843	-40.1725
17.7954	1	17.7954	1.078	17.7954	-40.1655
17.8065	1	17.8065	1.072	17.8065	-40.1595
17.8176	1	17.8176	1.066	17.8176	-40.1535
17.8287	1	17.8287	1.061	17.8287	-40.1485
17.8397	1	17.8397	1.057	17.8397	-40.1445
17.8508	1	17.8508	1.053	17.8508	-40.1405
17.8619	1	17.8619	1.049	17.8619	-40.1365
17.873	1	17.873	1.046	17.873	-40.1335
17.884	1	17.884	1.043	17.884	-40.1305
17.8951	1	17.8951	1.04	17.8951	-40.1275
17.9062	1	17.9062	1.038	17.9062	-40.1255
17.9173	1	17.9173	1.036	17.9173	-40.1235
17.9283	1	17.9283	1.034	17.9283	-40.1215
17.9394	1	17.9394	1.032	17.9394	-40.1195
17.9505	1	17.9505	1.031	17.9505	-40.1185
17.9616	1	17.9616	1.03	17.9616	-40.1175
17.9726	1	17.9726	1.029	17.9726	-40.1165
17.9837	1	17.9837	1.028	17.9837	-40.1155
17.9948	1	17.9948	1.027	17.9948	-40.1145
18.0059	1	18.0059	1.026	18.0059	-40.1135
18.0169	1	18.0169	1.026	18.0169	-40.1135
18.028	1	18.028	1.025	18.028	-40.1125
18.0391	1	18.0391	1.025	18.0391	-40.1125
18.0502	1	18.0502	1.024	18.0502	-40.1115
18.0612	1	18.0612	1.024	18.0612	-40.1115
18.0723	1	18.0723	1.024	18.0723	-40.1115
18.0834	1	18.0834	1.024	18.0834	-40.1115
18.0945	1	18.0945	1.024	18.0945	-40.1115
18.1056	1	18.1056	1.023	18.1056	-40.1105
18.1166	1	18.1166	1.023	18.1166	-40.1105
18.1277	1	18.1277	1.023	18.1277	-40.1105
18.1388	1	18.1388	1.023	18.1388	-40.1105
18.1499	1	18.1499	1.023	18.1499	-40.1105
18.1609	1	18.1609	1.023	18.1609	-40.1105
18.172	1	18.172	1.023	18.172	-40.1105
18.1831	1	18.1831	1.023	18.1831	-40.1105
18.1942	1	18.1942	1.023	18.1942	-40.1105
18.2052	1	18.2052	1.023	18.2052	-40.1105
18.2163	1	18.2163	1.023	18.2163	-40.1105
18.2274	1	18.2274	1.023	18.2274	-40.1105
18.2385	1	18.2385	1.023	18.2385	-40.1105
18.2495	1	18.2495	1.023	18.2495	-40.1105
18.2606	1	18.2606	1.023	18.2606	-40.1105
18.2717	1	18.2717	1.023	18.2717	-40.1105
18.2828	1	18.2828	1.023	18.2828	-40.1105
18.2938	1	18.2938	1.023	18.2938	-40.1105
18.3049	1	18.3049	1.024	18.3049	-40.1115
18.316	1	18.316	1.024	18.316	-40.1115
18.3271	1	18.3271	1.024	18.3271	-40.1115
18.3381	1	18.3381	1.024	18.3381	-40.1115
18.3492	1	18.3492	1.024	18.3492	-40.1115
18.3603	1	18.3603	1.024	18.3603	-40.1115
18.3714	1	18.3714	1.024	18.3714	-40.1115
18.3825	1	18.3825	1.025	18.3825	-40.1125
18.3935	1	18.3935	1.025	18.3935	-40.1125
18.4046	1	18.4046	1.025	18.4046	-40.1125
18.4157	1	18.4157	1.026	18.4157	-40.1135
18.4268	1	18.4268	1.026	18.4268	-40.1135
18.4378	1	18.4378	1.027	18.4378	-40.1145
18.4489	1	18.4489	1.027	18.4489	-40.1145
18.46	1	18.46	1.028	18.46	-40.1155
18.4711	1	18.4711	1.028	18.4711	-40.1155
18.4821	1	18.4821	1.029	18.4821	-40.1165
18.4932	1	18.4932	1.03	18.4932	-40.1175
18.5043	1	18.5043	1.032	18.5043	-40.1195
18.5154	1	18.5154	1.033	18.5154	-40.1205
18.5264	1	18.5264	1.034	18.5264	-40.1215
18.5375	1	18.5375	1.036	18.5375	-40.1235
18.5486	1	18.5486	1.038	18.5486	-40.1255
18.5597	1	18.5597	1.041	18.5597	-40.1285
18.5707	1	18.5707	1.043	18.5707	-40.1305
18.5818	1	18.5818	1.047	18.5818	-40.1345
18.5929	1	18.5929	1.05	18.5929	-40.1375
18.604	1	18.604	1.054	18.604	-40.1415
18.615	1	18.615	1.059	18.615	-40.1465
18.6261	1	18.6261	1.064	18.6261	-40.1515
18.6372	1	18.6372	1.071	18.6372	-40.1585
18.6483	1	18.6483	1.077	18.6483	-40.1645
18.6594	1	18.6594	1.085	18.6594	-40.1725
18.6704	1	18.6704	1.094	18.6704	-40.1815
18.6815	1	18.6815	1.103	18.6815	-40.1905
18.6926	1	18.6926	1.114	18.6926	-40.2015
18.7037	1	18.7037	1.126	18.7037	-40.2135
18.7147	1	18.7147	1.139	18.7147	-40.2265
18.7258	1	18.7258	1.154	18.7258	-40.2415
18.7369	1	18.7369	1.17	18.7369	-40.2575
18.748	1	18.748	1.188	18.748	-40.2755
18.759	2	18.759	1.207	18.759	-39.2945
18.7701	2	18.7701	1.228	18.7701	-39.3155
18.7812	2	18.7812	1.251	18.7812	-39.3385
18.7923	2	18.7923	1.275	18.7923	-39.3625
18.8033	2	18.8033	1.302	18.8033	-39.3895
18.8144	2	18.8144	1.33	18.8144	-39.4175
18.8255	2	18.8255	1.36	18.8255	-39.4475
18.8366	1	18.8366	1.392	18.8366	-40.4795
18.8476	1	18.8476	1.426	18.8476	-40.5135
18.8587	1	18.8587	1.461	18.8587	-40.5485
18.8698	1	18.8698	1.499	18.8698	-40.5865
18.8809	1	18.8809	1.538	18.8809	-40.6255
18.8919	1	18.8919	1.579	18.8919	-40.6665
18.903	1	18.903	1.621	18.903	-40.7085
18.9141	1	18.9141	1.664	18.9141	-40.7515
18.9252	2	18.9252	1.709	18.9252	-39.7965
18.9363	2	18.9363	1.754	18.9363	-39.8415
18.9473	1	18.9473	1.8	18.9473	-40.8875
18.9584	1	18.9584	1.847	18.9584	-40.9345
18.9695	1	18.9695	1.893	18.9695	-40.9805
18.9806	1	18.9806	1.94	18.9806	-41.0275
18.9916	1	18.9916	1.986	18.9916	-41.0735
19.0027	1	19.0027	2.031	19.0027	-41.1185
19.0138	2	19.0138	2.076	19.0138	-40.1635
19.0249	2	19.0249	2.118	19.0249	-40.2055
19.0359	2	19.0359	2.16	19.0359	-40.2475
19.047	2	19.047	2.199	19.047	-40.2865
19.0581	3	19.0581	2.235	19.0581	-39.3225
19.0692	5	19.0692	2.269	19.0692	-37.3565
19.0802	5	19.0802	2.3	19.0802	-37.3875
19.0913	4	19.0913	2.327	19.0913	-38.4145
19.1024	3	19.1024	2.351	19.1024	-39.4385
19.1135	3	19.1135	2.371	19.1135	-39.4585
19.1245	2	19.1245	2.388	19.1245	-40.4755
19.1356	3	19.1356	2.4	19.1356	-39.4875
19.1467	3	19.1467	2.408	19.1467	-39.4955
19.1578	3	19.1578	2.411	19.1578	-39.4985
19.1688	3	19.1688	2.41	19.1688	-39.4975
19.1799	3	19.1799	2.405	19.1799	-39.4925
19.191	3	19.191	2.396	19.191	-39.4835
19.2021	3	19.2021	2.382	19.2021	-39.4695
19.2132	3	19.2132	2.364	19.2132	-39.4515
19.2242	3	19.2242	2.342	19.2242	-39.4295
19.2353	3	19.2353	2.317	19.2353	-39.4045
19.2464	2	19.2464	2.288	19.2464	-40.3755
19.2575	2	19.2575	2.256	19.2575	-40.3435
19.2685	2	19.2685	2.221	19.2685	-40.3085
19.2796	2	19.2796	2.183	19.2796	-40.2705
19.2907	1	19.2907	2.143	19.2907	-41.2305
19.3018	2	19.3018	2.101	19.3018	-40.1885
19.3128	2	19.3128	2.057	19.3128	-40.1445
19.3239	2	19.3239	2.012	19.3239	-40.0995
19.335	2	19.335	1.966	19.335	-40.0535
19.3461	2	19.3461	1.92	19.3461	-40.0075
19.3571	2	19.3571	1.873	19.3571	-39.9605
19.3682	2	19.3682	1.826	19.3682	-39.9135
19.3793	2	19.3793	1.78	19.3793	-39.8675
19.3904	1	19.3904	1.734	19.3904	-40.8215
19.4014	1	19.4014	1.688	19.4014	-40.7755
19.4125	2	19.4125	1.644	19.4125	-39.7315
19.4236	2	19.4236	1.601	19.4236	-39.6885
19.4347	2	19.4347	1.559	19.4347	-39.6465
19.4457	2	19.4457	1.519	19.4457	-39.6065
19.4568	2	19.4568	1.481	19.4568	-39.5685
19.4679	2	19.4679	1.444	19.4679	-39.5315
19.479	2	19.479	1.409	19.479	-39.4965
19.4901	2	19.4901	1.376	19.4901	-39.4635
19.5011	1	19.5011	1.344	19.5011	-40.4315
19.5122	1	19.5122	1.315	19.5122	-40.4025
19.5233	1	19.5233	1.287	19.5233	-40.3745
19.5344	1	19.5344	1.262	19.5344	-40.3495
19.5454	1	19.5454	1.238	19.5454	-40.3255
19.5565	1	19.5565	1.216	19.5565	-40.3035
19.5676	1	19.5676	1.196	19.5676	-40.2835
19.5787	1	19.5787	1.177	19.5787	-40.2645
19.5897	1	19.5897	1.16	19.5897	-40.2475
19.6008	1	19.6008	1.145	19.6008	-40.2325
19.6119	1	19.6119	1.131	19.6119	-40.2185
19.623	1	19.623	1.118	19.623	-40.2055
19.634	1	19.634	1.107	19.634	-40.1945
19.6451	1	19.6451	1.097	19.6451	-40.1845
19.6562	1	19.6562	1.087	19.6562	-40.1745
19.6673	1	19.6673	1.079	19.6673	-40.1665
19.6783	1	19.6783	1.072	19.6783	-40.1595
19.6894	1	19.6894	1.065	19.6894	-40.1525
19.7005	1	19.7005	1.06	19.7005	-40.1475
19.7116	1	19.7116	1.055	19.7116	-40.1425
19.7226	1	19.7226	1.05	19.7226	-40.1375
19.7337	1	19.7337	1.046	19.7337	-40.1335
19.7448	1	19.7448	1.043	19.7448	-40.1305
19.7559	1	19.7559	1.04	19.7559	-40.1275
19.767	1	19.767	1.037	19.767	-40.1245
19.778	1	19.778	1.035	19.778	-40.1225
19.7891	1	19.7891	1.033	19.7891	-40.1205
19.8002	1	19.8002	1.031	19.8002	-40.1185
19.8113	1	19.8113	1.03	19.8113	-40.1175
19.8223	1	19.8223	1.029	19.8223	-40.1165
19.8334	1	19.8334	1.028	19.8334	-40.1155
19.8445	1	19.8445	1.027	19.8445	-40.1145
19.8556	1	19.8556	1.026	19.8556	-40.1135
19.8666	1	19.8666	1.025	19.8666	-40.1125
19.8777	1	19.8777	1.024	19.8777	-40.1115
19.8888	1	19.8888	1.024	19.8888	-40.1115
19.8999	1	19.8999	1.023	19.8999	-40.1105
19.9109	1	19.9109	1.023	19.9109	-40.1105
19.922	1	19.922	1.023	19.922	-40.1105
19.9331	1	19.9331	1.022	19.9331	-40.1095
19.9442	1	19.9442	1.022	19.9442	-40.1095
19.9552	1	19.9552	1.022	19.9552	-40.1095
19.9663	1	19.9663	1.021	19.9663	-40.1085
19.9774	1	19.9774	1.021	19.9774	-40.1085

## Sheet: Figure 3
Figure 3
epsilon-N2			iota-N2			both zeta-N2 and epsilon								zeta-N2					zeta-N2				BM2 fit of solely epsilon-N2 data				BM2 fit of both epsilon- and zeta-N2 data
data from Gregoryanz et al 2007			data from Turnbull et al 2018			single crystal data;								reanalyzed powder data from Gregoryanz et al 2007					DFT calculations				from EoSFit				from EoSFit
P (GPa)	V / N2 (A3)		P (GPa)	V / N2 (A3)		P (GPa)	error on P (GPa)	unit cell V (A3)	error on V (A3)	V / N2 (A3)	error on V/N2 (A3)			P (GPa)	V / unit cell (A3)	V / N2 (A3)			P (GPa)	V / N2 (A3)			P (GPa)	V / N2 (A3)			P (GPa)	V / N2 (A3)
15.9247	22.15		56.0243	15.9666		54	2	393.5	0.7	16.4	0.02			80	237.561	14.8476			63	15.35			0	29.2776			0	29.1674
16.2908	21.815													86	232.515	14.5322			70	14.83			1	28.3652			1	28.2699
16.7873	21.7643					63	2	250.2	0.3	15.6375	0.01875			90	228.768	14.298			86	13.89			2	27.5768			2	27.4931
17.0854	21.7101					70	2	244	0.13	15.25	0.00813			99	221.596	13.8497							3	26.8836			3	26.8092
18.1792	21.3616					86	2	227.96	0.02	14.2475	0.00125			110	214.628	13.4143							4	26.2657			4	26.1988
19.3385	21.1384																						5	25.7089			5	25.6483
19.9028	20.8372																						6	25.2021			6	25.147
21.5593	20.4448																						7	24.7381			7	24.6876
22.9837	20.1437																						8	24.3102			8	24.2638
23.7121	20.0456																						9	23.9137			9	23.8708
23.8114	20.0287																						10	23.5443			10	23.5045
24.7393	19.7749																						11	23.1988			11	23.1619
27.2889	19.3961																						12	22.8745			12	22.8401
30.3029	18.8176																						13	22.5691			13	22.537
32.3563	18.4421																						14	22.2806			14	22.2506
33.679	18.5065																						15	22.0074			15	21.9793
37.1554	18.0465																						16	21.748			16	21.7216
40.3329	17.7489																						17	21.5012			17	21.4764
43.875	17.3532																						18	21.2659			18	21.2426
46.8203	17.1741																						19	21.0412			19	21.0192
51.0235	16.8529																						20	20.8262			20	20.8055
54.9618	16.5655																						21	20.6201			21	20.6006
																							22	20.4224			22	20.4039
																							23	20.2323			23	20.2149
																							24	20.0494			24	20.033
																							25	19.8732			25	19.8577
																							26	19.7033			26	19.6887
																							27	19.5392			27	19.5254
																							28	19.3807			28	19.3676
																							29	19.2273			29	19.215
																							30	19.0788			30	19.0671
																							31	18.9349			31	18.9239
																							32	18.7953			32	18.7849
																							33	18.6599			33	18.6501
																							34	18.5283			34	18.5191
																							35	18.4005			35	18.3918
																							36	18.2761			36	18.2679
																							37	18.1551			37	18.1474
																							38	18.0373			38	18.0301
																							39	17.9226			39	17.9157
																							40	17.8107			40	17.8043
																							41	17.7016			41	17.6956
																							42	17.5951			42	17.5895
																							43	17.4912			43	17.4859
																							44	17.3896			44	17.3848
																							45	17.2904			45	17.2859
																							46	17.1935			46	17.1893
																							47	17.0986			47	17.0948
																							48	17.0059			48	17.0023
																							49	16.9151			49	16.9118
																							50	16.8262			50	16.8232
																							51	16.7391			51	16.7365
																							52	16.6539			52	16.6515
																							53	16.5703			53	16.5681
																							54	16.4883			54	16.4864
																							55	16.408			55	16.4063
																							56	16.3291			56	16.3277
																							57	16.2518			57	16.2506
																							58	16.1759			58	16.1749
																							59	16.1013			59	16.1005
																							60	16.0281			60	16.0276
																							61	15.9562			61	15.9558
																							62	15.8856			62	15.8854
																							63	15.8161			63	15.8161
																							64	15.7478			64	15.748
																							65	15.6807			65	15.6811
																							66	15.6147			66	15.6153
																							67	15.5498			67	15.5505
																							68	15.4859			68	15.4868
																							69	15.423			69	15.4241
																							70	15.3612			70	15.3624
																							71	15.3002			71	15.3016
																							72	15.2403			72	15.2417
																							73	15.1812			73	15.1828
																							74	15.123			74	15.1248
																							75	15.0656			75	15.0676
																							76	15.0092			76	15.0112
																							77	14.9535			77	14.9557
																							78	14.8986			78	14.9009
																							79	14.8445			79	14.8469
																							80	14.7911			80	14.7937
																							81	14.7385			81	14.7412
																							82	14.6866			82	14.6894
																							83	14.6354			83	14.6383
																							84	14.5849			84	14.5879
																							85	14.5351			85	14.5382
																							86	14.4859			86	14.4891
																							87	14.4374			87	14.4406
																							88	14.3894			88	14.3928
																							89	14.3421			89	14.3456
																							90	14.2954			90	14.299
																							91	14.2493			91	14.2529
																							92	14.2037			92	14.2075
																							93	14.1587			93	14.1625
																							94	14.1142			94	14.1182
																							95	14.0703			95	14.0743
																							96	14.0269			96	14.031
																							97	13.984			97	13.9882
																							98	13.9416			98	13.9459
																							99	13.8997			99	13.904
																							100	13.8583			100	13.8627
																							101	13.8173			101	13.8218
																							102	13.7768			102	13.7814
																							103	13.7368			103	13.7414
																							104	13.6972			104	13.7019
																							105	13.658			105	13.6628
																							106	13.6193			106	13.6241
																							107	13.581			107	13.5859
																							108	13.543			108	13.548
																							109	13.5055			109	13.5106
																							110	13.4684			110	13.4735
																							111	13.4317			111	13.4369
																							112	13.3954			112	13.4006
																							113	13.3594			113	13.3647
																							114	13.3238			114	13.3291
																							115	13.2885			115	13.2939
																							116	13.2536			116	13.2591
																							117	13.2191			117	13.2246
																							118	13.1849			118	13.1904
																							119	13.151			119	13.1566
																							120	13.1175			120	13.1231
																							121	13.0843			121	13.09
																							122	13.0514			122	13.0571
																							123	13.0188			123	13.0246
																							124	12.9865			124	12.9924
																							125	12.9545			125	12.9604
																							126	12.9229			126	12.9288
																							127	12.8915			127	12.8975
																							128	12.8604			128	12.8664
																							129	12.8296			129	12.8356
																							130	12.799			130	12.8051
																							131	12.7688			131	12.7749
																							132	12.7388			132	12.745
																							133	12.7091			133	12.7153
																							134	12.6796			134	12.6859
																							135	12.6504			135	12.6567
																							136	12.6214			136	12.6278
																							137	12.5927			137	12.5991
																							138	12.5643			138	12.5707
																							139	12.5361			139	12.5426
																							140	12.5081			140	12.5146
																							141	12.4804			141	12.4869
																							142	12.4528			142	12.4594
																							143	12.4256			143	12.4322
																							144	12.3985			144	12.4052
																							145	12.3717			145	12.3784
																							146	12.3451			146	12.3518
																							147	12.3187			147	12.3254
																							148	12.2925			148	12.2993
																							149	12.2665			149	12.2733
																							150	12.2407			150	12.2476

## Sheet: Figure 4
Figure 4
Marker	Pressure in GPa	ICOBI	N-N Distance in Å
o	20.0	2.82024	1.10314
o	20.0	2.81996	1.10299
o	20.0	2.86079	1.10478
o	20.0	2.86077	1.10479
o	20.0	2.86062	1.10487
o	20.0	2.86068	1.10482
o	20.0	2.86087	1.10465
o	20.0	2.86093	1.10463
o	20.0	0.01169	3.06034
o	20.0	0.00268	2.82748
o	20.0	0.00955	2.62495
o	20.0	0.01173	3.06024
o	20.0	0.00268	2.82742
o	20.0	0.00954	2.62499
o	20.0	0.01175	3.06005
o	20.0	0.00269	2.82785
o	20.0	0.00958	2.62453
o	20.0	0.02621	2.4855
o	20.0	0.00369	3.29083
o	20.0	0.0099	3.34241
o	20.0	0.02631	2.48548
o	20.0	0.00368	3.29011
o	20.0	0.00996	3.34299
o	20.0	0.02629	2.48535
o	20.0	0.00368	3.29072
o	20.0	0.00993	3.34274
o	20.0	0.00955	2.62489
o	20.0	0.00269	2.8276
o	20.0	0.01169	3.06018
o	20.0	0.00954	2.62508
o	20.0	0.00267	2.82739
o	20.0	0.01172	3.06019
o	20.0	0.00958	2.62446
o	20.0	0.00268	2.82792
o	20.0	0.01175	3.05998
o	20.0	0.00989	3.34244
o	20.0	0.00368	3.29067
o	20.0	0.02623	2.48549
o	20.0	0.00996	3.34305
o	20.0	0.00369	3.29013
o	20.0	0.02631	2.48541
o	20.0	0.00994	3.34281
o	20.0	0.00368	3.29083
o	20.0	0.02627	2.48532
o	20.0	0.02638	2.48537
o	20.0	0.00999	3.34287
o	20.0	0.00368	3.29054
o	20.0	0.0263	2.48553
o	20.0	0.00996	3.34251
o	20.0	0.00368	3.29079
o	20.0	0.02628	2.48547
o	20.0	0.00995	3.34255
o	20.0	0.00368	3.29042
o	20.0	0.00268	2.82763
o	20.0	0.01179	3.0602
o	20.0	0.00957	2.62477
o	20.0	0.00269	2.82774
o	20.0	0.01173	3.06012
o	20.0	0.00957	2.62463
o	20.0	0.00268	2.8274
o	20.0	0.01174	3.06036
o	20.0	0.00955	2.62497
o	20.0	0.00368	3.29042
o	20.0	0.01002	3.34284
o	20.0	0.02635	2.48539
o	20.0	0.00368	3.29089
o	20.0	0.00996	3.34254
o	20.0	0.0263	2.48549
o	20.0	0.00369	3.29047
o	20.0	0.00994	3.34261
o	20.0	0.02627	2.48544
o	20.0	0.00957	2.62474
o	20.0	0.01178	3.06014
o	20.0	0.00268	2.82768
o	20.0	0.00956	2.62473
o	20.0	0.01173	3.06012
o	20.0	0.00268	2.82768
o	20.0	0.00955	2.625
o	20.0	0.01174	3.06037
o	20.0	0.00268	2.82737
o	20.0	0.00325	3.11859
o	20.0	0.0014	2.86752
o	20.0	0.00269	3.1188
o	20.0	0.00634	2.80912
o	20.0	0.00268	3.11889
o	20.0	0.00626	2.80936
o	20.0	0.0013	2.78464
o	20.0	0.0013	2.78458
o	20.0	0.00834	2.74804
o	20.0	0.00415	3.05233
o	20.0	0.00412	3.05242
o	20.0	0.00508	2.89351
o	20.0	0.00635	2.80909
o	20.0	0.00269	3.11885
o	20.0	0.00629	2.80939
o	20.0	0.00268	3.11885
o	20.0	0.0013	2.78443
o	20.0	0.00129	2.78479
o	20.0	0.00414	3.05231
o	20.0	0.00415	3.05243
o	20.0	0.00834	2.74802
o	20.0	0.00508	2.89353
o	20.0	0.00326	3.11857
o	20.0	0.00139	2.86792
o	20.0	0.00269	3.11888
o	20.0	0.00628	2.80923
o	20.0	0.00838	2.74788
o	20.0	0.0042	3.05231
o	20.0	0.00417	3.05244
o	20.0	0.00508	2.8933
o	20.0	0.0013	2.7846
o	20.0	0.0013	2.78468
o	20.0	0.00628	2.80922
o	20.0	0.00269	3.11885
o	20.0	0.00417	3.05244
o	20.0	0.0042	3.0524
o	20.0	0.00837	2.74788
o	20.0	0.00508	2.89339
o	20.0	0.00129	2.78475
o	20.0	0.0013	2.78452
o	20.0	0.00325	3.11858
o	20.0	0.00139	2.86777
o	20.0	0.00508	2.89333
o	20.0	0.0013	2.78464
o	20.0	0.00129	2.78466
o	20.0	0.00836	2.74797
o	20.0	0.00416	3.05231
o	20.0	0.00417	3.05235
o	20.0	0.00509	2.89325
o	20.0	0.0013	2.78471
o	20.0	0.0013	2.7846
o	20.0	0.00418	3.05241
o	20.0	0.00416	3.05227
o	20.0	0.00835	2.74805
o	20.0	0.00139	2.86788
o	20.0	0.00326	3.11855
o	20.0	0.00268	3.11886
o	20.0	0.00624	2.80935
o	20.0	0.0027	3.11879
o	20.0	0.0063	2.80924
o	20.0	0.00625	2.80931
o	20.0	0.00269	3.11897
o	20.0	0.00629	2.80923
o	20.0	0.0027	3.11879
o	20.0	0.0014	2.8676
o	20.0	0.00325	3.11855
o	20.0	0.00269	3.11891
o	20.0	0.00628	2.80918
o	20.0	0.0063	2.80915
o	20.0	0.00269	3.11897
o	20.0	0.0014	2.86766
o	20.0	0.00325	3.11861
o	30.0	2.78394	1.10142
o	30.0	2.78417	1.10143
o	30.0	2.83083	1.10358
o	30.0	2.83086	1.10363
o	30.0	2.83075	1.10361
o	30.0	2.83077	1.10359
o	30.0	2.83087	1.10357
o	30.0	2.83088	1.1035
o	30.0	0.01539	2.95485
o	30.0	0.00323	2.72498
o	30.0	0.01238	2.52823
o	30.0	0.01543	2.95483
o	30.0	0.00322	2.72497
o	30.0	0.01238	2.52817
o	30.0	0.01544	2.9547
o	30.0	0.00323	2.72529
o	30.0	0.01242	2.52788
o	30.0	0.03532	2.37475
o	30.0	0.00459	3.18327
o	30.0	0.0126	3.23029
o	30.0	0.03539	2.37478
o	30.0	0.00459	3.1827
o	30.0	0.01263	3.23076
o	30.0	0.03538	2.37476
o	30.0	0.00459	3.18302
o	30.0	0.01263	3.23068
o	30.0	0.01238	2.52823
o	30.0	0.00323	2.72505
o	30.0	0.01539	2.95472
o	30.0	0.01239	2.52821
o	30.0	0.00322	2.72499
o	30.0	0.01542	2.95474
o	30.0	0.01241	2.52785
o	30.0	0.00322	2.72534
o	30.0	0.01542	2.95463
o	30.0	0.0126	3.23035
o	30.0	0.0046	3.18316
o	30.0	0.03534	2.37471
o	30.0	0.01265	3.23079
o	30.0	0.0046	3.18273
o	30.0	0.03538	2.37475
o	30.0	0.01264	3.23078
o	30.0	0.00459	3.18304
o	30.0	0.03537	2.3747
o	30.0	0.03537	2.37472
o	30.0	0.01262	3.23089
o	30.0	0.0046	3.18284
o	30.0	0.03532	2.37475
o	30.0	0.01259	3.23051
o	30.0	0.0046	3.18318
o	30.0	0.03531	2.37473
o	30.0	0.01259	3.23048
o	30.0	0.0046	3.1829
o	30.0	0.00323	2.72521
o	30.0	0.01543	2.95471
o	30.0	0.0124	2.52797
o	30.0	0.00323	2.72521
o	30.0	0.01538	2.95468
o	30.0	0.0124	2.528
o	30.0	0.00322	2.72495
o	30.0	0.01538	2.95479
o	30.0	0.01237	2.52829
o	30.0	0.0046	3.18275
o	30.0	0.01263	3.23085
o	30.0	0.03536	2.37475
o	30.0	0.00459	3.18327
o	30.0	0.01258	3.23049
o	30.0	0.03533	2.37476
o	30.0	0.0046	3.18295
o	30.0	0.01258	3.23048
o	30.0	0.03533	2.37475
o	30.0	0.0124	2.52797
o	30.0	0.01542	2.9547
o	30.0	0.00323	2.72521
o	30.0	0.01239	2.52805
o	30.0	0.01539	2.95466
o	30.0	0.00323	2.7252
o	30.0	0.01237	2.52834
o	30.0	0.01539	2.95485
o	30.0	0.00323	2.72488
o	30.0	0.00387	3.01664
o	30.0	0.00212	2.79308
o	30.0	0.00363	2.99592
o	30.0	0.00769	2.69572
o	30.0	0.00362	2.99595
o	30.0	0.00763	2.69594
o	30.0	0.00169	2.68946
o	30.0	0.00168	2.68947
o	30.0	0.01185	2.63483
o	30.0	0.00509	2.94141
o	30.0	0.00507	2.94147
o	30.0	0.00675	2.77208
o	30.0	0.00622	3.40036
o	30.0	0.00769	2.69567
o	30.0	0.00363	2.99599
o	30.0	0.00763	2.69595
o	30.0	0.00362	2.99593
o	30.0	0.00169	2.68934
o	30.0	0.00168	2.68959
o	30.0	0.00507	2.94136
o	30.0	0.00507	2.94149
o	30.0	0.01185	2.63481
o	30.0	0.00621	3.40042
o	30.0	0.00675	2.77206
o	30.0	0.00387	3.01666
o	30.0	0.00212	2.79338
o	30.0	0.00363	2.99589
o	30.0	0.00766	2.69593
o	30.0	0.01188	2.63478
o	30.0	0.00511	2.94135
o	30.0	0.0051	2.94141
o	30.0	0.00677	2.7719
o	30.0	0.0062	3.40036
o	30.0	0.00169	2.68949
o	30.0	0.00169	2.68951
o	30.0	0.00766	2.6959
o	30.0	0.00363	2.99588
o	30.0	0.0051	2.9414
o	30.0	0.00511	2.94144
o	30.0	0.01187	2.63479
o	30.0	0.00621	3.40034
o	30.0	0.00676	2.77203
o	30.0	0.00169	2.68955
o	30.0	0.00169	2.68945
o	30.0	0.00387	3.01667
o	30.0	0.00212	2.79322
o	30.0	0.00676	2.77196
o	30.0	0.00619	3.40025
o	30.0	0.00169	2.68945
o	30.0	0.00169	2.68948
o	30.0	0.01186	2.6348
o	30.0	0.00509	2.94142
o	30.0	0.00511	2.94137
o	30.0	0.00619	3.40031
o	30.0	0.00677	2.7719
o	30.0	0.00169	2.6895
o	30.0	0.00169	2.68944
o	30.0	0.0051	2.94142
o	30.0	0.0051	2.9414
o	30.0	0.01187	2.63487
o	30.0	0.00212	2.79336
o	30.0	0.00387	3.01668
o	30.0	0.00362	2.99584
o	30.0	0.00764	2.69602
o	30.0	0.00364	2.99585
o	30.0	0.00766	2.6958
o	30.0	0.00764	2.69596
o	30.0	0.00362	2.99594
o	30.0	0.00767	2.69579
o	30.0	0.00363	2.99587
o	30.0	0.00212	2.79312
o	30.0	0.00387	3.01665
o	30.0	0.00363	2.99598
o	30.0	0.00767	2.69578
o	30.0	0.00767	2.6958
o	30.0	0.00363	2.99601
o	30.0	0.00212	2.79323
o	30.0	0.00387	3.01663
o	40.0	2.74615	1.10035
o	40.0	2.74555	1.10021
o	40.0	2.80153	1.10257
o	40.0	2.80156	1.10259
o	40.0	2.80154	1.10254
o	40.0	2.80157	1.10253
o	40.0	2.80165	1.10249
o	40.0	2.80164	1.10247
o	40.0	0.01901	2.87654
o	40.0	0.00375	2.65163
o	40.0	0.01505	2.45927
o	40.0	0.01902	2.87654
o	40.0	0.00375	2.65164
o	40.0	0.01505	2.45924
o	40.0	0.01902	2.87641
o	40.0	0.00375	2.6519
o	40.0	0.01508	2.45901
o	40.0	0.04476	2.2943
o	40.0	0.00545	3.1066
o	40.0	0.01536	3.14859
o	40.0	0.04476	2.29433
o	40.0	0.00545	3.10618
o	40.0	0.01536	3.14896
o	40.0	0.04478	2.29434
o	40.0	0.00544	3.10641
o	40.0	0.01538	3.14892
o	40.0	0.01505	2.45927
o	40.0	0.00375	2.6517
o	40.0	0.019	2.8764
o	40.0	0.01505	2.45927
o	40.0	0.00374	2.65167
o	40.0	0.01902	2.87644
o	40.0	0.01507	2.45901
o	40.0	0.00375	2.65194
o	40.0	0.01901	2.87633
o	40.0	0.01537	3.14868
o	40.0	0.00545	3.10651
o	40.0	0.04476	2.29424
o	40.0	0.01538	3.14903
o	40.0	0.00546	3.10618
o	40.0	0.04474	2.29427
o	40.0	0.01539	3.14904
o	40.0	0.00545	3.10641
o	40.0	0.04477	2.29426
o	40.0	0.04485	2.29434
o	40.0	0.01544	3.14902
o	40.0	0.00544	3.10629
o	40.0	0.04482	2.29434
o	40.0	0.01543	3.1487
o	40.0	0.00544	3.10657
o	40.0	0.04482	2.29435
o	40.0	0.01543	3.14869
o	40.0	0.00545	3.10636
o	40.0	0.00374	2.65178
o	40.0	0.01906	2.87652
o	40.0	0.01507	2.45906
o	40.0	0.00374	2.65182
o	40.0	0.01904	2.87647
o	40.0	0.01506	2.45911
o	40.0	0.00374	2.6516
o	40.0	0.01904	2.87654
o	40.0	0.01504	2.45935
o	40.0	0.00544	3.10622
o	40.0	0.01545	3.14902
o	40.0	0.04485	2.29434
o	40.0	0.00544	3.10662
o	40.0	0.01543	3.14871
o	40.0	0.04483	2.29433
o	40.0	0.00544	3.10637
o	40.0	0.01543	3.14873
o	40.0	0.04483	2.29434
o	40.0	0.01507	2.45905
o	40.0	0.01906	2.87648
o	40.0	0.00374	2.6518
o	40.0	0.01506	2.45915
o	40.0	0.01904	2.87643
o	40.0	0.00375	2.65182
o	40.0	0.01503	2.45938
o	40.0	0.01904	2.87656
o	40.0	0.00374	2.65157
o	40.0	0.00446	2.94519
o	40.0	0.00283	2.73675
o	40.0	0.00453	2.90821
o	40.0	0.00878	2.61464
o	40.0	0.00453	2.9082
o	40.0	0.00875	2.6148
o	40.0	0.00202	2.62042
o	40.0	0.00203	2.62042
o	40.0	0.01521	2.55314
o	40.0	0.00589	2.86076
o	40.0	0.00587	2.86089
o	40.0	0.00867	2.68308
o	40.0	0.00806	3.312
o	40.0	0.00879	2.61463
o	40.0	0.00453	2.90825
o	40.0	0.00875	2.61481
o	40.0	0.00452	2.90819
o	40.0	0.00203	2.62033
o	40.0	0.00202	2.62051
o	40.0	0.00587	2.86082
o	40.0	0.00588	2.86081
o	40.0	0.01521	2.55311
o	40.0	0.00805	3.31203
o	40.0	0.00868	2.68307
o	40.0	0.00447	2.94519
o	40.0	0.00283	2.73695
o	40.0	0.00453	2.90815
o	40.0	0.00875	2.61485
o	40.0	0.01522	2.55313
o	40.0	0.00592	2.86075
o	40.0	0.00588	2.86078
o	40.0	0.00868	2.68301
o	40.0	0.00805	3.31197
o	40.0	0.00202	2.62045
o	40.0	0.00203	2.62043
o	40.0	0.00875	2.61485
o	40.0	0.00453	2.90815
o	40.0	0.0059	2.86078
o	40.0	0.0059	2.8608
o	40.0	0.01522	2.55312
o	40.0	0.00804	3.31196
o	40.0	0.00868	2.68308
o	40.0	0.00202	2.62046
o	40.0	0.00203	2.62042
o	40.0	0.00446	2.94518
o	40.0	0.00283	2.73681
o	40.0	0.00867	2.68302
o	40.0	0.00804	3.31191
o	40.0	0.00202	2.62039
o	40.0	0.00203	2.62041
o	40.0	0.01522	2.55312
o	40.0	0.00589	2.86084
o	40.0	0.00588	2.86078
o	40.0	0.00804	3.31195
o	40.0	0.00869	2.68297
o	40.0	0.00203	2.62042
o	40.0	0.00202	2.62038
o	40.0	0.00588	2.86081
o	40.0	0.00589	2.86082
o	40.0	0.01521	2.55317
o	40.0	0.00283	2.73695
o	40.0	0.00448	2.94522
o	40.0	0.00453	2.90814
o	40.0	0.00872	2.61491
o	40.0	0.00453	2.90814
o	40.0	0.00876	2.6147
o	40.0	0.00871	2.61489
o	40.0	0.00453	2.90821
o	40.0	0.00874	2.61469
o	40.0	0.00453	2.90815
o	40.0	0.00283	2.73672
o	40.0	0.00447	2.94516
o	40.0	0.00453	2.90823
o	40.0	0.00873	2.61472
o	40.0	0.00875	2.61472
o	40.0	0.00453	2.90825
o	40.0	0.00283	2.73685
o	40.0	0.00446	2.94513
o	50.0	2.70552	1.09935
o	50.0	2.70535	1.09927
o	50.0	2.77344	1.10174
o	50.0	2.77332	1.10189
o	50.0	2.77341	1.10169
o	50.0	2.77336	1.10183
o	50.0	2.77353	1.10166
o	50.0	2.77341	1.10176
o	50.0	0.02246	2.81605
o	50.0	0.00421	2.59458
o	50.0	0.01761	2.4056
o	50.0	0.02248	2.81603
o	50.0	0.00421	2.59459
o	50.0	0.01761	2.40559
o	50.0	0.02247	2.81595
o	50.0	0.00421	2.59477
o	50.0	0.01763	2.40542
o	50.0	0.05427	2.23265
o	50.0	0.00991	3.45431
o	50.0	0.00619	3.04722
o	50.0	0.01819	3.0858
o	50.0	0.05427	2.2327
o	50.0	0.00992	3.45434
o	50.0	0.00619	3.04688
o	50.0	0.01819	3.0861
o	50.0	0.05428	2.23269
o	50.0	0.00991	3.45414
o	50.0	0.00618	3.04706
o	50.0	0.0182	3.08603
o	50.0	0.0176	2.40564
o	50.0	0.00422	2.59457
o	50.0	0.02247	2.81601
o	50.0	0.0176	2.40567
o	50.0	0.00422	2.59454
o	50.0	0.02248	2.81603
o	50.0	0.01762	2.40545
o	50.0	0.00422	2.59475
o	50.0	0.02247	2.81595
o	50.0	0.01819	3.08586
o	50.0	0.00618	3.04711
o	50.0	0.00992	3.45444
o	50.0	0.05428	2.23261
o	50.0	0.0182	3.08615
o	50.0	0.00618	3.04685
o	50.0	0.00992	3.45439
o	50.0	0.05426	2.23266
o	50.0	0.01821	3.08613
o	50.0	0.00617	3.04703
o	50.0	0.00992	3.45422
o	50.0	0.05429	2.23263
o	50.0	0.00992	3.45427
o	50.0	0.05431	2.23267
o	50.0	0.01822	3.08611
o	50.0	0.00618	3.04701
o	50.0	0.00991	3.4542
o	50.0	0.05429	2.23269
o	50.0	0.0182	3.08589
o	50.0	0.00618	3.04719
o	50.0	0.00991	3.45438
o	50.0	0.05428	2.23267
o	50.0	0.01821	3.08587
o	50.0	0.0062	3.04703
o	50.0	0.0042	2.59469
o	50.0	0.02249	2.81602
o	50.0	0.01763	2.40547
o	50.0	0.00421	2.59473
o	50.0	0.02247	2.81596
o	50.0	0.01762	2.4055
o	50.0	0.00421	2.59456
o	50.0	0.02247	2.81605
o	50.0	0.0176	2.40567
o	50.0	0.00617	3.0469
o	50.0	0.01823	3.08612
o	50.0	0.05432	2.23266
o	50.0	0.00992	3.45437
o	50.0	0.00618	3.04718
o	50.0	0.01821	3.08592
o	50.0	0.05428	2.23267
o	50.0	0.00992	3.45422
o	50.0	0.00617	3.04702
o	50.0	0.01821	3.0859
o	50.0	0.0543	2.23266
o	50.0	0.00992	3.45442
o	50.0	0.01761	2.40549
o	50.0	0.0225	2.81603
o	50.0	0.00422	2.59466
o	50.0	0.01761	2.40557
o	50.0	0.02248	2.81598
o	50.0	0.00423	2.59468
o	50.0	0.01759	2.40573
o	50.0	0.02248	2.81611
o	50.0	0.00422	2.59448
o	50.0	0.00498	2.89064
o	50.0	0.0035	2.6926
o	50.0	0.00547	2.84116
o	50.0	0.0099	2.55173
o	50.0	0.00546	2.84114
o	50.0	0.00986	2.55191
o	50.0	0.00233	2.56692
o	50.0	0.00233	2.56695
o	50.0	0.01852	2.49043
o	50.0	0.00657	2.79808
o	50.0	0.0066	2.79815
o	50.0	0.01048	2.61445
o	50.0	0.00983	3.24451
o	50.0	0.0099	2.55179
o	50.0	0.00547	2.84123
o	50.0	0.00988	2.55186
o	50.0	0.00547	2.84116
o	50.0	0.00234	2.56684
o	50.0	0.00233	2.56703
o	50.0	0.00658	2.79816
o	50.0	0.0066	2.79805
o	50.0	0.01853	2.4904
o	50.0	0.00983	3.24462
o	50.0	0.01048	2.61434
o	50.0	0.00498	2.89061
o	50.0	0.0035	2.69277
o	50.0	0.00547	2.84109
o	50.0	0.00988	2.55188
o	50.0	0.01853	2.49042
o	50.0	0.00662	2.7981
o	50.0	0.0066	2.79806
o	50.0	0.01047	2.6144
o	50.0	0.00982	3.24447
o	50.0	0.00233	2.56694
o	50.0	0.00233	2.56697
o	50.0	0.00987	2.55192
o	50.0	0.00547	2.84115
o	50.0	0.00661	2.79813
o	50.0	0.00661	2.79806
o	50.0	0.01854	2.49041
o	50.0	0.00982	3.24456
o	50.0	0.01048	2.61436
o	50.0	0.00233	2.56696
o	50.0	0.00233	2.56695
o	50.0	0.00498	2.89063
o	50.0	0.0035	2.69266
o	50.0	0.01048	2.61439
o	50.0	0.00981	3.24443
o	50.0	0.00233	2.56691
o	50.0	0.00233	2.56695
o	50.0	0.01853	2.49043
o	50.0	0.0066	2.79813
o	50.0	0.00659	2.79806
o	50.0	0.00983	3.24454
o	50.0	0.01047	2.61428
o	50.0	0.00233	2.56693
o	50.0	0.00233	2.56694
o	50.0	0.00661	2.79816
o	50.0	0.0066	2.79805
o	50.0	0.01853	2.49046
o	50.0	0.0035	2.69275
o	50.0	0.00499	2.89063
o	50.0	0.00546	2.8411
o	50.0	0.00987	2.55195
o	50.0	0.00547	2.8411
o	50.0	0.00988	2.55184
o	50.0	0.00984	2.55199
o	50.0	0.00547	2.84119
o	50.0	0.00988	2.55178
o	50.0	0.00547	2.84113
o	50.0	0.0035	2.69258
o	50.0	0.00498	2.89058
o	50.0	0.00547	2.84118
o	50.0	0.00987	2.55179
o	50.0	0.00988	2.55186
o	50.0	0.00546	2.84122
o	50.0	0.0035	2.69268
o	50.0	0.00498	2.89056
d	60.0	2.75222	1.10026
d	60.0	2.75232	1.10021
d	60.0	2.75234	1.10027
d	60.0	2.7522	1.10025
d	60.0	2.75227	1.1002
d	60.0	2.75216	1.10024
d	60.0	2.75221	1.10008
d	60.0	2.75225	1.10035
d	60.0	2.74302	1.10358
d	60.0	2.74301	1.10358
d	60.0	2.74302	1.10363
d	60.0	2.74304	1.10363
d	60.0	2.63369	1.10093
d	60.0	2.63368	1.10097
d	60.0	2.63359	1.10102
d	60.0	2.63372	1.1009
d	60.0	0.00368	2.87966
d	60.0	0.00497	2.7082
d	60.0	0.01381	3.30182
d	60.0	0.00859	3.43225
d	60.0	0.00859	3.43227
d	60.0	0.00826	2.45679
d	60.0	0.00191	2.58032
d	60.0	0.00889	2.80276
d	60.0	0.02141	2.37751
d	60.0	0.00211	2.48782
d	60.0	0.00616	2.81263
d	60.0	0.01402	2.47164
d	60.0	0.01985	2.42577
d	60.0	0.00964	2.78346
d	60.0	0.00844	3.30416
d	60.0	0.00241	2.74828
d	60.0	0.01074	2.66326
d	60.0	0.0184	3.41483
d	60.0	0.0108	3.30141
d	60.0	0.01692	3.28013
d	60.0	0.0171	2.36523
d	60.0	0.01721	2.84802
d	60.0	0.01129	2.84025
d	60.0	0.04215	2.23021
d	60.0	0.00859	3.43224
d	60.0	0.00857	3.43228
d	60.0	0.01382	3.30181
d	60.0	0.00498	2.70824
d	60.0	0.00827	2.45675
d	60.0	0.00191	2.58032
d	60.0	0.02135	2.37751
d	60.0	0.00889	2.80276
d	60.0	0.0021	2.48782
d	60.0	0.014	2.47166
d	60.0	0.00617	2.81266
d	60.0	0.00963	2.7835
d	60.0	0.01985	2.42577
d	60.0	0.00844	3.30415
d	60.0	0.00243	2.7483
d	60.0	0.01839	3.41482
d	60.0	0.01075	2.66329
d	60.0	0.01692	3.28012
d	60.0	0.01078	3.30138
d	60.0	0.01721	2.84801
d	60.0	0.01711	2.36523
d	60.0	0.04213	2.23029
d	60.0	0.01129	2.84021
d	60.0	0.00367	2.87968
d	60.0	0.00827	2.45677
d	60.0	0.00889	2.80277
d	60.0	0.02138	2.37754
d	60.0	0.00191	2.58034
d	60.0	0.0021	2.48782
d	60.0	0.01985	2.42578
d	60.0	0.00963	2.78348
d	60.0	0.00617	2.81266
d	60.0	0.014	2.47164
d	60.0	0.00241	2.74831
d	60.0	0.00844	3.30416
d	60.0	0.01079	3.30139
d	60.0	0.01692	3.28014
d	60.0	0.0184	3.41485
d	60.0	0.01074	2.66326
d	60.0	0.01129	2.84023
d	60.0	0.04213	2.23027
d	60.0	0.01721	2.848
d	60.0	0.0171	2.36523
d	60.0	0.00826	2.45674
d	60.0	0.02137	2.37751
d	60.0	0.00889	2.80277
d	60.0	0.00191	2.58032
d	60.0	0.00211	2.48778
d	60.0	0.00964	2.78348
d	60.0	0.01985	2.42577
d	60.0	0.01402	2.47166
d	60.0	0.00617	2.81265
d	60.0	0.00242	2.74825
d	60.0	0.00844	3.30411
d	60.0	0.01692	3.28009
d	60.0	0.0108	3.30143
d	60.0	0.01074	2.66325
d	60.0	0.01839	3.41481
d	60.0	0.04213	2.23027
d	60.0	0.01129	2.84021
d	60.0	0.0171	2.36523
d	60.0	0.01721	2.84803
d	60.0	0.00366	2.87959
d	60.0	0.00499	2.70825
d	60.0	0.01382	3.30174
d	60.0	0.00857	3.4323
d	60.0	0.00858	3.43221
d	60.0	0.0021	2.48785
d	60.0	0.00191	2.5803
d	60.0	0.00889	2.80278
d	60.0	0.02134	2.37748
d	60.0	0.00843	3.30418
d	60.0	0.00243	2.74834
d	60.0	0.00617	2.81267
d	60.0	0.01401	2.47168
d	60.0	0.01985	2.42578
d	60.0	0.00964	2.78352
d	60.0	0.01711	2.36524
d	60.0	0.01721	2.84804
d	60.0	0.01129	2.84022
d	60.0	0.04214	2.23032
d	60.0	0.01075	2.66333
d	60.0	0.01839	3.41487
d	60.0	0.01079	3.30141
d	60.0	0.01692	3.28015
d	60.0	0.00858	3.43226
d	60.0	0.00859	3.43216
d	60.0	0.01382	3.30182
d	60.0	0.00498	2.7081
d	60.0	0.00211	2.48788
d	60.0	0.0019	2.58028
d	60.0	0.02139	2.3776
d	60.0	0.00888	2.80271
d	60.0	0.00843	3.3042
d	60.0	0.00243	2.74834
d	60.0	0.01403	2.47165
d	60.0	0.00616	2.81263
d	60.0	0.00965	2.78347
d	60.0	0.01985	2.42577
d	60.0	0.01721	2.84807
d	60.0	0.0171	2.36523
d	60.0	0.04216	2.23024
d	60.0	0.01129	2.84024
d	60.0	0.01839	3.41491
d	60.0	0.01074	2.6633
d	60.0	0.01692	3.28016
d	60.0	0.01081	3.30144
d	60.0	0.00366	2.87961
d	60.0	0.0021	2.48787
d	60.0	0.00888	2.8027
d	60.0	0.02136	2.37753
d	60.0	0.0019	2.58029
d	60.0	0.00244	2.74828
d	60.0	0.00843	3.30409
d	60.0	0.01984	2.42578
d	60.0	0.00964	2.78355
d	60.0	0.00616	2.81266
d	60.0	0.01402	2.47173
d	60.0	0.01129	2.84017
d	60.0	0.04212	2.2303
d	60.0	0.01721	2.84801
d	60.0	0.01709	2.3653
d	60.0	0.0108	3.30147
d	60.0	0.01691	3.28008
d	60.0	0.01838	3.41481
d	60.0	0.01074	2.66333
d	60.0	0.0021	2.48785
d	60.0	0.02138	2.37752
d	60.0	0.00889	2.80277
d	60.0	0.00191	2.58032
d	60.0	0.00242	2.74837
d	60.0	0.00843	3.30425
d	60.0	0.00964	2.78344
d	60.0	0.01985	2.42578
d	60.0	0.01402	2.4716
d	60.0	0.00616	2.81266
d	60.0	0.04217	2.23028
d	60.0	0.01129	2.84026
d	60.0	0.01711	2.36518
d	60.0	0.01722	2.8481
d	60.0	0.01693	3.2802
d	60.0	0.0108	3.3014
d	60.0	0.01075	2.66327
d	60.0	0.0184	3.41497
d	60.0	0.0031	2.7285
d	60.0	0.02757	2.37214
d	60.0	0.01522	2.73076
d	60.0	0.01523	2.73078
d	60.0	0.01311	2.96042
d	60.0	0.01068	3.10855
d	60.0	0.00399	3.48673
d	60.0	0.00539	2.69744
d	60.0	0.0147	2.4967
d	60.0	0.00404	3.49051
d	60.0	0.00232	2.74327
d	60.0	0.00499	3.42812
d	60.0	0.01926	2.75131
d	60.0	0.01056	2.62402
d	60.0	0.00596	3.32417
d	60.0	0.06113	2.19465
d	60.0	0.03862	2.25405
d	60.0	0.02587	2.7452
d	60.0	0.01522	2.73079
d	60.0	0.01522	2.73075
d	60.0	0.02757	2.37216
d	60.0	0.01311	2.9604
d	60.0	0.00398	3.4867
d	60.0	0.01069	3.10856
d	60.0	0.0054	2.69743
d	60.0	0.01469	2.49673
d	60.0	0.00233	2.74329
d	60.0	0.00404	3.49054
d	60.0	0.01925	2.75132
d	60.0	0.005	3.42812
d	60.0	0.01056	2.62403
d	60.0	0.06111	2.19467
d	60.0	0.00596	3.32413
d	60.0	0.02585	2.74526
d	60.0	0.03862	2.25406
d	60.0	0.00309	2.72852
d	60.0	0.01312	2.96046
d	60.0	0.00539	2.69746
d	60.0	0.01068	3.10858
d	60.0	0.00398	3.48674
d	60.0	0.00404	3.49052
d	60.0	0.00232	2.7433
d	60.0	0.01469	2.49671
d	60.0	0.01056	2.62402
d	60.0	0.01925	2.75132
d	60.0	0.005	3.42814
d	60.0	0.03863	2.25403
d	60.0	0.02586	2.74525
d	60.0	0.06113	2.19464
d	60.0	0.00596	3.32418
d	60.0	0.01311	2.96036
d	60.0	0.00539	2.69744
d	60.0	0.00399	3.48673
d	60.0	0.01069	3.10856
d	60.0	0.00233	2.74325
d	60.0	0.00404	3.49047
d	60.0	0.0147	2.49667
d	60.0	0.01056	2.624
d	60.0	0.00499	3.42812
d	60.0	0.01925	2.75129
d	60.0	0.02587	2.74525
d	60.0	0.03862	2.25404
d	60.0	0.00596	3.32416
d	60.0	0.06112	2.19466
d	60.0	0.00308	2.7285
d	60.0	0.02757	2.37218
d	60.0	0.01523	2.73074
d	60.0	0.01522	2.73082
d	60.0	0.01469	2.49676
d	60.0	0.00402	3.49052
d	60.0	0.00233	2.74332
d	60.0	0.01068	3.10856
d	60.0	0.00398	3.48669
d	60.0	0.00539	2.69741
d	60.0	0.00596	3.32413
d	60.0	0.0611	2.19467
d	60.0	0.03862	2.25408
d	60.0	0.02585	2.74529
d	60.0	0.005	3.42813
d	60.0	0.01925	2.75135
d	60.0	0.01056	2.62408
d	60.0	0.01523	2.73074
d	60.0	0.01523	2.73087
d	60.0	0.02758	2.37212
d	60.0	0.0147	2.49674
d	60.0	0.00233	2.74329
d	60.0	0.00403	3.49049
d	60.0	0.004	3.4867
d	60.0	0.01068	3.10854
d	60.0	0.00539	2.69741
d	60.0	0.06112	2.19467
d	60.0	0.00596	3.32414
d	60.0	0.02588	2.74525
d	60.0	0.03862	2.25408
d	60.0	0.01926	2.75135
d	60.0	0.00499	3.42812
d	60.0	0.01056	2.62406
d	60.0	0.00308	2.72851
d	60.0	0.00403	3.49049
d	60.0	0.00233	2.74324
d	60.0	0.0147	2.49674
d	60.0	0.00539	2.69739
d	60.0	0.01068	3.10853
d	60.0	0.004	3.48663
d	60.0	0.03861	2.25408
d	60.0	0.02586	2.74524
d	60.0	0.06109	2.19471
d	60.0	0.00596	3.32406
d	60.0	0.01056	2.62407
d	60.0	0.01925	2.75136
d	60.0	0.00499	3.42805
d	60.0	0.00233	2.74333
d	60.0	0.00403	3.49049
d	60.0	0.01469	2.49672
d	60.0	0.00539	2.69744
d	60.0	0.00398	3.48675
d	60.0	0.01069	3.10858
d	60.0	0.02586	2.74531
d	60.0	0.03863	2.25404
d	60.0	0.00596	3.32419
d	60.0	0.06114	2.19464
d	60.0	0.01056	2.62405
d	60.0	0.005	3.42816
d	60.0	0.01925	2.75136
d	60.0	0.00477	2.82102
d	60.0	0.00395	2.67998
d	60.0	0.00284	2.52039
d	60.0	0.00284	2.52039
d	60.0	0.01253	2.72474
d	60.0	0.01932	2.8805
d	60.0	0.04568	2.24586
d	60.0	0.01994	2.7704
d	60.0	0.01348	2.86908
d	60.0	0.05979	2.20799
d	60.0	0.00284	2.52039
d	60.0	0.00284	2.52039
d	60.0	0.01252	2.72471
d	60.0	0.01932	2.88043
d	60.0	0.01993	2.77042
d	60.0	0.04568	2.24586
d	60.0	0.0598	2.20802
d	60.0	0.01347	2.86908
d	60.0	0.00395	2.67999
d	60.0	0.00477	2.82103
d	60.0	0.01933	2.88045
d	60.0	0.01252	2.72468
d	60.0	0.01348	2.86909
d	60.0	0.05979	2.20801
d	60.0	0.04568	2.24585
d	60.0	0.01993	2.77039
d	60.0	0.01931	2.88048
d	60.0	0.01252	2.72476
d	60.0	0.05979	2.20802
d	60.0	0.01347	2.86909
d	60.0	0.01994	2.77041
d	60.0	0.04567	2.24586
d	60.0	0.00477	2.82104
d	60.0	0.00395	2.68
d	60.0	0.00284	2.52039
d	60.0	0.00284	2.52039
d	60.0	0.04568	2.24587
d	60.0	0.01993	2.77048
d	60.0	0.01347	2.86913
d	60.0	0.05978	2.20803
d	60.0	0.01252	2.72473
d	60.0	0.01932	2.88046
d	60.0	0.00284	2.52038
d	60.0	0.00284	2.52039
d	60.0	0.01993	2.77047
d	60.0	0.04568	2.24587
d	60.0	0.05979	2.20802
d	60.0	0.01348	2.86914
d	60.0	0.01253	2.72477
d	60.0	0.01933	2.88054
d	60.0	0.00395	2.68002
d	60.0	0.00477	2.82104
d	60.0	0.01348	2.86913
d	60.0	0.05977	2.20803
d	60.0	0.04569	2.24587
d	60.0	0.01994	2.77047
d	60.0	0.01931	2.8805
d	60.0	0.01253	2.72478
d	60.0	0.05976	2.20803
d	60.0	0.01348	2.86915
d	60.0	0.01994	2.77046
d	60.0	0.04568	2.24587
d	60.0	0.01932	2.88048
d	60.0	0.01253	2.72471
d	70.0	2.72354	1.09955
d	70.0	2.7237	1.09946
d	70.0	2.72369	1.09938
d	70.0	2.72365	1.09945
d	70.0	2.72368	1.09948
d	70.0	2.72353	1.09952
d	70.0	2.72362	1.0995
d	70.0	2.72355	1.09966
d	70.0	2.70943	1.10338
d	70.0	2.70941	1.10342
d	70.0	2.70927	1.10363
d	70.0	2.70937	1.10345
d	70.0	2.59009	1.10073
d	70.0	2.59004	1.10082
d	70.0	2.59009	1.10076
d	70.0	2.59	1.10084
d	70.0	0.00391	2.83668
d	70.0	0.00538	2.66219
d	70.0	0.01574	3.24895
d	70.0	0.00901	3.38493
d	70.0	0.00903	3.38499
d	70.0	0.00892	2.42797
d	70.0	0.00216	2.54348
d	70.0	0.0099	2.75383
d	70.0	0.02392	2.33336
d	70.0	0.00244	2.44989
d	70.0	0.00698	2.76517
d	70.0	0.01616	2.42539
d	70.0	0.02322	2.38021
d	70.0	0.01109	2.73716
d	70.0	0.00958	3.25961
d	70.0	0.00248	2.70516
d	70.0	0.01168	2.62344
d	70.0	0.02056	3.37695
d	70.0	0.01186	3.25601
d	70.0	0.01884	3.23807
d	70.0	0.01867	2.329
d	70.0	0.01935	2.80385
d	70.0	0.01225	2.79758
d	70.0	0.04851	2.18602
d	70.0	0.00901	3.38496
d	70.0	0.00901	3.38491
d	70.0	0.01573	3.24894
d	70.0	0.00539	2.6622
d	70.0	0.00892	2.4279
d	70.0	0.00217	2.54348
d	70.0	0.02391	2.33341
d	70.0	0.0099	2.75378
d	70.0	0.00243	2.44989
d	70.0	0.01616	2.42544
d	70.0	0.00698	2.76523
d	70.0	0.01109	2.73724
d	70.0	0.02322	2.38022
d	70.0	0.00956	3.25966
d	70.0	0.00247	2.70513
d	70.0	0.02056	3.37691
d	70.0	0.01168	2.6235
d	70.0	0.01883	3.23799
d	70.0	0.01186	3.25609
d	70.0	0.01935	2.80379
d	70.0	0.01868	2.32904
d	70.0	0.04852	2.18601
d	70.0	0.01225	2.79757
d	70.0	0.00392	2.83664
d	70.0	0.00892	2.42792
d	70.0	0.00989	2.75375
d	70.0	0.02389	2.33338
d	70.0	0.00217	2.54348
d	70.0	0.00243	2.44992
d	70.0	0.02322	2.38023
d	70.0	0.01109	2.73729
d	70.0	0.00698	2.76522
d	70.0	0.01616	2.42547
d	70.0	0.00247	2.70522
d	70.0	0.00958	3.25957
d	70.0	0.01185	3.25604
d	70.0	0.01883	3.23798
d	70.0	0.02056	3.37687
d	70.0	0.01167	2.6235
d	70.0	0.01225	2.79754
d	70.0	0.04848	2.18606
d	70.0	0.01935	2.80377
d	70.0	0.01866	2.32908
d	70.0	0.00892	2.42795
d	70.0	0.02394	2.33332
d	70.0	0.0099	2.75378
d	70.0	0.00217	2.54347
d	70.0	0.00243	2.44991
d	70.0	0.01108	2.7372
d	70.0	0.02322	2.38022
d	70.0	0.01615	2.42544
d	70.0	0.00698	2.76519
d	70.0	0.00246	2.70506
d	70.0	0.00957	3.25961
d	70.0	0.01883	3.23799
d	70.0	0.01186	3.25606
d	70.0	0.01168	2.6235
d	70.0	0.02056	3.37695
d	70.0	0.04851	2.18601
d	70.0	0.01225	2.79754
d	70.0	0.01868	2.32904
d	70.0	0.01935	2.8038
d	70.0	0.00391	2.83668
d	70.0	0.00538	2.66219
d	70.0	0.01574	3.24897
d	70.0	0.00902	3.38505
d	70.0	0.00901	3.38494
d	70.0	0.00243	2.44986
d	70.0	0.00217	2.54349
d	70.0	0.0099	2.75379
d	70.0	0.02392	2.33327
d	70.0	0.00957	3.25968
d	70.0	0.00247	2.70523
d	70.0	0.00699	2.76528
d	70.0	0.01615	2.42543
d	70.0	0.02324	2.3802
d	70.0	0.01109	2.73726
d	70.0	0.01868	2.32904
d	70.0	0.01935	2.80379
d	70.0	0.01225	2.79758
d	70.0	0.04851	2.18601
d	70.0	0.01168	2.62349
d	70.0	0.02056	3.3769
d	70.0	0.01186	3.25609
d	70.0	0.01883	3.238
d	70.0	0.00903	3.38496
d	70.0	0.00902	3.38494
d	70.0	0.01575	3.24902
d	70.0	0.00538	2.6621
d	70.0	0.00244	2.4499
d	70.0	0.00217	2.54346
d	70.0	0.02393	2.33333
d	70.0	0.0099	2.75377
d	70.0	0.00958	3.25966
d	70.0	0.00247	2.70518
d	70.0	0.01616	2.4254
d	70.0	0.00698	2.7652
d	70.0	0.01109	2.73723
d	70.0	0.02322	2.38022
d	70.0	0.01935	2.80384
d	70.0	0.01867	2.32901
d	70.0	0.04851	2.18603
d	70.0	0.01225	2.79756
d	70.0	0.02056	3.37694
d	70.0	0.01168	2.62345
d	70.0	0.01884	3.23805
d	70.0	0.01186	3.25602
d	70.0	0.00391	2.83671
d	70.0	0.00243	2.44989
d	70.0	0.0099	2.75379
d	70.0	0.02395	2.33333
d	70.0	0.00217	2.54346
d	70.0	0.00247	2.70514
d	70.0	0.00957	3.25965
d	70.0	0.02323	2.38021
d	70.0	0.01108	2.7372
d	70.0	0.00698	2.76526
d	70.0	0.01615	2.42542
d	70.0	0.01225	2.79756
d	70.0	0.0485	2.18601
d	70.0	0.01935	2.80381
d	70.0	0.01868	2.32902
d	70.0	0.01186	3.25606
d	70.0	0.01883	3.238
d	70.0	0.02056	3.37696
d	70.0	0.01168	2.62348
d	70.0	0.00244	2.44983
d	70.0	0.02391	2.33335
d	70.0	0.0099	2.75383
d	70.0	0.00216	2.5435
d	70.0	0.00248	2.70526
d	70.0	0.00957	3.25975
d	70.0	0.01109	2.73722
d	70.0	0.02323	2.38021
d	70.0	0.01618	2.42534
d	70.0	0.00698	2.76523
d	70.0	0.04852	2.18603
d	70.0	0.01225	2.79763
d	70.0	0.01868	2.32897
d	70.0	0.01935	2.80386
d	70.0	0.01884	3.23808
d	70.0	0.01185	3.25601
d	70.0	0.01168	2.62342
d	70.0	0.02057	3.37696
d	70.0	0.00356	2.70364
d	70.0	0.0309	2.33226
d	70.0	0.01657	2.68702
d	70.0	0.01659	2.68696
d	70.0	0.01433	2.92008
d	70.0	0.01228	3.06285
d	70.0	0.00445	3.43939
d	70.0	0.00626	2.65053
d	70.0	0.01675	2.44829
d	70.0	0.00453	3.44359
d	70.0	0.00252	2.69702
d	70.0	0.00538	3.3822
d	70.0	0.02184	2.70977
d	70.0	0.01153	2.58161
d	70.0	0.00642	3.2865
d	70.0	0.07082	2.14957
d	70.0	0.04325	2.2164
d	70.0	0.02921	2.70632
d	70.0	0.01657	2.68698
d	70.0	0.01658	2.68704
d	70.0	0.0309	2.33226
d	70.0	0.01433	2.92006
d	70.0	0.00445	3.43935
d	70.0	0.01228	3.06288
d	70.0	0.00626	2.65052
d	70.0	0.01674	2.44845
d	70.0	0.00251	2.69701
d	70.0	0.00451	3.44359
d	70.0	0.02183	2.7098
d	70.0	0.00537	3.38219
d	70.0	0.01153	2.58159
d	70.0	0.07081	2.14958
d	70.0	0.00642	3.28647
d	70.0	0.0292	2.70626
d	70.0	0.04323	2.21644
d	70.0	0.00356	2.7036
d	70.0	0.01433	2.92008
d	70.0	0.00626	2.65051
d	70.0	0.01228	3.06286
d	70.0	0.00445	3.43931
d	70.0	0.00453	3.44369
d	70.0	0.00251	2.69709
d	70.0	0.01674	2.4484
d	70.0	0.01153	2.58163
d	70.0	0.02184	2.7098
d	70.0	0.00538	3.38214
d	70.0	0.04323	2.21644
d	70.0	0.02919	2.70628
d	70.0	0.0708	2.14961
d	70.0	0.00642	3.28643
d	70.0	0.01433	2.92006
d	70.0	0.00626	2.6505
d	70.0	0.00445	3.43934
d	70.0	0.01228	3.06284
d	70.0	0.00251	2.69694
d	70.0	0.00452	3.44352
d	70.0	0.01674	2.44839
d	70.0	0.01153	2.5816
d	70.0	0.00538	3.38218
d	70.0	0.02183	2.70984
d	70.0	0.0292	2.70627
d	70.0	0.04323	2.21642
d	70.0	0.00642	3.28646
d	70.0	0.07082	2.14958
d	70.0	0.00356	2.70363
d	70.0	0.03091	2.33225
d	70.0	0.01658	2.6869
d	70.0	0.01657	2.68704
d	70.0	0.01673	2.44847
d	70.0	0.00452	3.44356
d	70.0	0.00251	2.69712
d	70.0	0.01229	3.06294
d	70.0	0.00444	3.43937
d	70.0	0.00626	2.65051
d	70.0	0.00642	3.28649
d	70.0	0.07081	2.14958
d	70.0	0.04323	2.21643
d	70.0	0.0292	2.70626
d	70.0	0.00538	3.38221
d	70.0	0.02183	2.7098
d	70.0	0.01153	2.58159
d	70.0	0.01659	2.68698
d	70.0	0.01658	2.68699
d	70.0	0.03092	2.33223
d	70.0	0.01674	2.44839
d	70.0	0.00251	2.69705
d	70.0	0.00453	3.4435
d	70.0	0.00445	3.43937
d	70.0	0.01228	3.06286
d	70.0	0.00626	2.65052
d	70.0	0.07081	2.14958
d	70.0	0.00642	3.28649
d	70.0	0.0292	2.70631
d	70.0	0.04325	2.2164
d	70.0	0.02184	2.70978
d	70.0	0.00538	3.38219
d	70.0	0.01153	2.58162
d	70.0	0.00355	2.70366
d	70.0	0.00451	3.44348
d	70.0	0.00251	2.69703
d	70.0	0.01674	2.44841
d	70.0	0.00625	2.6505
d	70.0	0.01228	3.06291
d	70.0	0.00445	3.43937
d	70.0	0.04324	2.21641
d	70.0	0.0292	2.70628
d	70.0	0.07082	2.14957
d	70.0	0.00642	3.28649
d	70.0	0.01153	2.58159
d	70.0	0.02183	2.70982
d	70.0	0.00538	3.38221
d	70.0	0.00252	2.69715
d	70.0	0.00452	3.44353
d	70.0	0.01673	2.4484
d	70.0	0.00626	2.65058
d	70.0	0.00446	3.43944
d	70.0	0.01228	3.06294
d	70.0	0.02921	2.70637
d	70.0	0.04325	2.21639
d	70.0	0.00642	3.28657
d	70.0	0.07083	2.14955
d	70.0	0.01153	2.58156
d	70.0	0.00538	3.38226
d	70.0	0.02183	2.70974
d	70.0	0.00533	2.78456
d	70.0	0.00451	2.64788
d	70.0	0.00319	2.48294
d	70.0	0.00319	2.48294
d	70.0	0.01386	2.68066
d	70.0	0.02156	2.84044
d	70.0	0.05181	2.20565
d	70.0	0.02205	2.7278
d	70.0	0.01483	2.82608
d	70.0	0.06766	2.16566
d	70.0	0.00319	2.48294
d	70.0	0.00319	2.48295
d	70.0	0.01385	2.68056
d	70.0	0.02156	2.84039
d	70.0	0.02205	2.72782
d	70.0	0.05181	2.20565
d	70.0	0.06768	2.16562
d	70.0	0.01483	2.82617
d	70.0	0.00451	2.64788
d	70.0	0.00533	2.78455
d	70.0	0.02156	2.84037
d	70.0	0.01386	2.6806
d	70.0	0.01483	2.82613
d	70.0	0.06768	2.16566
d	70.0	0.05182	2.20564
d	70.0	0.02205	2.72782
d	70.0	0.02156	2.84045
d	70.0	0.01386	2.68064
d	70.0	0.06769	2.16565
d	70.0	0.01482	2.82612
d	70.0	0.02205	2.72776
d	70.0	0.05181	2.20566
d	70.0	0.00533	2.78462
d	70.0	0.00451	2.64792
d	70.0	0.00319	2.48295
d	70.0	0.00319	2.48294
d	70.0	0.05183	2.2056
d	70.0	0.02205	2.72788
d	70.0	0.01483	2.82624
d	70.0	0.06771	2.16559
d	70.0	0.01386	2.68048
d	70.0	0.02156	2.84033
d	70.0	0.00319	2.48295
d	70.0	0.00319	2.48294
d	70.0	0.02205	2.72781
d	70.0	0.05182	2.20564
d	70.0	0.06769	2.16565
d	70.0	0.01483	2.8261
d	70.0	0.01386	2.68064
d	70.0	0.02156	2.84042
d	70.0	0.00451	2.64793
d	70.0	0.00533	2.78462
d	70.0	0.01483	2.8262
d	70.0	0.0677	2.16561
d	70.0	0.05183	2.20562
d	70.0	0.02206	2.72783
d	70.0	0.02156	2.84037
d	70.0	0.01386	2.68056
d	70.0	0.06767	2.16565
d	70.0	0.01483	2.82616
d	70.0	0.02205	2.72784
d	70.0	0.05182	2.20562
d	70.0	0.02156	2.84035
d	70.0	0.01386	2.68057
d	80.0	2.69421	1.0989
d	80.0	2.69429	1.09888
d	80.0	2.69423	1.09891
d	80.0	2.69422	1.09892
d	80.0	2.69426	1.09895
d	80.0	2.6942	1.09897
d	80.0	2.69423	1.09899
d	80.0	2.69427	1.09891
d	80.0	2.67498	1.10363
d	80.0	2.67502	1.10357
d	80.0	2.67504	1.10355
d	80.0	2.67508	1.1035
d	80.0	2.54595	1.1009
d	80.0	2.54602	1.10084
d	80.0	2.54592	1.10094
d	80.0	2.54594	1.10088
d	80.0	0.0041	2.79769
d	80.0	0.00575	2.62161
d	80.0	0.01768	3.20114
d	80.0	0.00949	3.34268
d	80.0	0.00949	3.34266
d	80.0	0.00951	2.40303
d	80.0	0.00244	2.51067
d	80.0	0.0109	2.70953
d	80.0	0.02653	2.29398
d	80.0	0.00275	2.41658
d	80.0	0.0078	2.72301
d	80.0	0.0184	2.38447
d	80.0	0.02674	2.33969
d	80.0	0.01259	2.69611
d	80.0	0.01066	3.22006
d	80.0	0.00251	2.66729
d	80.0	0.01244	2.58809
d	80.0	0.02267	3.34401
d	80.0	0.01293	3.21559
d	80.0	0.02064	3.20078
d	80.0	0.01996	2.29834
d	80.0	0.02154	2.76338
d	80.0	0.0131	2.7591
d	80.0	0.0551	2.14657
d	80.0	0.00949	3.34266
d	80.0	0.00948	3.34269
d	80.0	0.01767	3.20114
d	80.0	0.00574	2.62163
d	80.0	0.00951	2.403
d	80.0	0.00245	2.51071
d	80.0	0.02653	2.29401
d	80.0	0.0109	2.70954
d	80.0	0.00275	2.41657
d	80.0	0.0184	2.38448
d	80.0	0.00779	2.723
d	80.0	0.01259	2.69614
d	80.0	0.02674	2.33969
d	80.0	0.01066	3.22006
d	80.0	0.00252	2.66729
d	80.0	0.02266	3.34393
d	80.0	0.01244	2.58813
d	80.0	0.02064	3.20078
d	80.0	0.01292	3.21557
d	80.0	0.02154	2.76339
d	80.0	0.01996	2.29834
d	80.0	0.05509	2.14661
d	80.0	0.0131	2.75909
d	80.0	0.0041	2.79772
d	80.0	0.00951	2.40298
d	80.0	0.0109	2.70957
d	80.0	0.02653	2.29401
d	80.0	0.00244	2.5107
d	80.0	0.00275	2.41657
d	80.0	0.02674	2.33967
d	80.0	0.01259	2.69611
d	80.0	0.00779	2.72301
d	80.0	0.0184	2.38446
d	80.0	0.00252	2.66733
d	80.0	0.01066	3.22006
d	80.0	0.01292	3.21557
d	80.0	0.02064	3.20078
d	80.0	0.02267	3.34398
d	80.0	0.01244	2.58813
d	80.0	0.0131	2.75911
d	80.0	0.0551	2.1466
d	80.0	0.02154	2.76337
d	80.0	0.01997	2.29833
d	80.0	0.00951	2.40302
d	80.0	0.02655	2.294
d	80.0	0.0109	2.70954
d	80.0	0.00244	2.51069
d	80.0	0.00276	2.41656
d	80.0	0.01259	2.69612
d	80.0	0.02674	2.3397
d	80.0	0.01841	2.38447
d	80.0	0.00779	2.72299
d	80.0	0.00251	2.66726
d	80.0	0.01066	3.22006
d	80.0	0.02064	3.20078
d	80.0	0.01292	3.21556
d	80.0	0.01244	2.58809
d	80.0	0.02267	3.344
d	80.0	0.05509	2.14663
d	80.0	0.0131	2.75909
d	80.0	0.01996	2.29834
d	80.0	0.02154	2.76338
d	80.0	0.0041	2.79772
d	80.0	0.00574	2.62155
d	80.0	0.01767	3.20119
d	80.0	0.00947	3.34267
d	80.0	0.00947	3.34271
d	80.0	0.00275	2.41658
d	80.0	0.00244	2.51071
d	80.0	0.0109	2.70955
d	80.0	0.02652	2.294
d	80.0	0.01066	3.22006
d	80.0	0.00252	2.6673
d	80.0	0.00779	2.72299
d	80.0	0.01841	2.38443
d	80.0	0.02674	2.33969
d	80.0	0.01259	2.69608
d	80.0	0.01996	2.29829
d	80.0	0.02154	2.76344
d	80.0	0.0131	2.75912
d	80.0	0.05512	2.1466
d	80.0	0.01244	2.5881
d	80.0	0.02267	3.34398
d	80.0	0.01294	3.21556
d	80.0	0.02065	3.20082
d	80.0	0.00947	3.34268
d	80.0	0.00947	3.3427
d	80.0	0.01767	3.20116
d	80.0	0.00575	2.62159
d	80.0	0.00276	2.41656
d	80.0	0.00244	2.5107
d	80.0	0.02653	2.29396
d	80.0	0.0109	2.70954
d	80.0	0.01066	3.22007
d	80.0	0.00251	2.66724
d	80.0	0.01841	2.38444
d	80.0	0.00779	2.72297
d	80.0	0.01259	2.69608
d	80.0	0.02673	2.33971
d	80.0	0.02154	2.76342
d	80.0	0.01996	2.2983
d	80.0	0.05513	2.14657
d	80.0	0.0131	2.75911
d	80.0	0.02267	3.34405
d	80.0	0.01244	2.58808
d	80.0	0.02065	3.2008
d	80.0	0.01294	3.21559
d	80.0	0.00411	2.79771
d	80.0	0.00276	2.41658
d	80.0	0.0109	2.70956
d	80.0	0.02654	2.29395
d	80.0	0.00245	2.51068
d	80.0	0.00251	2.66727
d	80.0	0.01067	3.22007
d	80.0	0.02674	2.3397
d	80.0	0.01259	2.69605
d	80.0	0.00779	2.72298
d	80.0	0.01841	2.38443
d	80.0	0.0131	2.75912
d	80.0	0.05511	2.14661
d	80.0	0.02154	2.76343
d	80.0	0.01996	2.29829
d	80.0	0.01293	3.21554
d	80.0	0.02065	3.20082
d	80.0	0.02267	3.34405
d	80.0	0.01244	2.58806
d	80.0	0.00275	2.41658
d	80.0	0.02651	2.29399
d	80.0	0.0109	2.70954
d	80.0	0.00245	2.51071
d	80.0	0.00252	2.66726
d	80.0	0.01066	3.22005
d	80.0	0.01259	2.69612
d	80.0	0.02674	2.3397
d	80.0	0.01841	2.38447
d	80.0	0.00779	2.72297
d	80.0	0.05511	2.14661
d	80.0	0.0131	2.7591
d	80.0	0.01996	2.29833
d	80.0	0.02154	2.76338
d	80.0	0.02064	3.20077
d	80.0	0.01294	3.21559
d	80.0	0.01244	2.58814
d	80.0	0.02267	3.34399
d	80.0	0.00411	2.68239
d	80.0	0.03419	2.29679
d	80.0	0.01793	2.64818
d	80.0	0.01792	2.6482
d	80.0	0.01544	2.88451
d	80.0	0.01387	3.02238
d	80.0	0.00496	3.39738
d	80.0	0.00715	2.60871
d	80.0	0.01879	2.40523
d	80.0	0.00497	3.40186
d	80.0	0.00271	2.65633
d	80.0	0.00571	3.34109
d	80.0	0.02449	2.67326
d	80.0	0.01242	2.54391
d	80.0	0.00683	3.25443
d	80.0	0.08111	2.10821
d	80.0	0.04772	2.18326
d	80.0	0.03248	2.67168
d	80.0	0.01792	2.6482
d	80.0	0.01792	2.64819
d	80.0	0.03419	2.29676
d	80.0	0.01544	2.88453
d	80.0	0.00496	3.39738
d	80.0	0.01386	3.02236
d	80.0	0.00715	2.60871
d	80.0	0.01878	2.4053
d	80.0	0.00271	2.65638
d	80.0	0.00497	3.40189
d	80.0	0.02449	2.67323
d	80.0	0.00571	3.34115
d	80.0	0.01242	2.54395
d	80.0	0.0811	2.10823
d	80.0	0.00683	3.25442
d	80.0	0.03248	2.67168
d	80.0	0.04772	2.18327
d	80.0	0.00411	2.68239
d	80.0	0.01544	2.88454
d	80.0	0.00715	2.60871
d	80.0	0.01387	3.02238
d	80.0	0.00496	3.39739
d	80.0	0.00496	3.40189
d	80.0	0.00271	2.65641
d	80.0	0.01878	2.40526
d	80.0	0.01242	2.54393
d	80.0	0.0245	2.67325
d	80.0	0.00571	3.34115
d	80.0	0.04772	2.18325
d	80.0	0.03248	2.67168
d	80.0	0.08112	2.1082
d	80.0	0.00683	3.25444
d	80.0	0.01544	2.88453
d	80.0	0.00715	2.60872
d	80.0	0.00496	3.3974
d	80.0	0.01386	3.02236
d	80.0	0.00271	2.65633
d	80.0	0.00497	3.40183
d	80.0	0.01878	2.40524
d	80.0	0.01242	2.54391
d	80.0	0.00571	3.34112
d	80.0	0.0245	2.67325
d	80.0	0.03248	2.67173
d	80.0	0.04772	2.18325
d	80.0	0.00683	3.25446
d	80.0	0.08111	2.1082
d	80.0	0.00411	2.68244
d	80.0	0.03419	2.29678
d	80.0	0.0179	2.6482
d	80.0	0.01791	2.64819
d	80.0	0.01879	2.40522
d	80.0	0.00497	3.40191
d	80.0	0.00271	2.65637
d	80.0	0.01386	3.02236
d	80.0	0.00496	3.39739
d	80.0	0.00715	2.60871
d	80.0	0.00682	3.25443
d	80.0	0.08111	2.10822
d	80.0	0.04772	2.18327
d	80.0	0.03249	2.67171
d	80.0	0.00571	3.34115
d	80.0	0.02449	2.67321
d	80.0	0.01242	2.54394
d	80.0	0.01791	2.64818
d	80.0	0.01791	2.64818
d	80.0	0.03419	2.29678
d	80.0	0.01879	2.40519
d	80.0	0.00271	2.65629
d	80.0	0.00497	3.40184
d	80.0	0.00496	3.39741
d	80.0	0.01386	3.02235
d	80.0	0.00715	2.60873
d	80.0	0.08112	2.10819
d	80.0	0.00683	3.25446
d	80.0	0.03249	2.67172
d	80.0	0.04772	2.18325
d	80.0	0.0245	2.67325
d	80.0	0.00571	3.34112
d	80.0	0.01242	2.5439
d	80.0	0.00412	2.68242
d	80.0	0.00498	3.40187
d	80.0	0.00271	2.65632
d	80.0	0.01879	2.40518
d	80.0	0.00715	2.60872
d	80.0	0.01386	3.02236
d	80.0	0.00496	3.39742
d	80.0	0.04773	2.18325
d	80.0	0.03249	2.67175
d	80.0	0.08112	2.10819
d	80.0	0.00683	3.25447
d	80.0	0.01242	2.54391
d	80.0	0.0245	2.67324
d	80.0	0.00571	3.34112
d	80.0	0.00271	2.65634
d	80.0	0.00497	3.4019
d	80.0	0.01878	2.40525
d	80.0	0.00715	2.60872
d	80.0	0.00496	3.3974
d	80.0	0.01386	3.02234
d	80.0	0.03248	2.6717
d	80.0	0.04772	2.18326
d	80.0	0.00683	3.25444
d	80.0	0.08112	2.1082
d	80.0	0.01242	2.54393
d	80.0	0.00571	3.34115
d	80.0	0.0245	2.67325
d	80.0	0.00588	2.75252
d	80.0	0.00509	2.61951
d	80.0	0.00356	2.44974
d	80.0	0.00356	2.44972
d	80.0	0.01508	2.6407
d	80.0	0.02383	2.8052
d	80.0	0.05789	2.17045
d	80.0	0.02412	2.68985
d	80.0	0.01606	2.78862
d	80.0	0.07583	2.12769
d	80.0	0.00356	2.44974
d	80.0	0.00356	2.44972
d	80.0	0.01509	2.64069
d	80.0	0.02384	2.80519
d	80.0	0.02412	2.68989
d	80.0	0.05789	2.17045
d	80.0	0.07582	2.12769
d	80.0	0.01606	2.78858
d	80.0	0.0051	2.61952
d	80.0	0.00588	2.75252
d	80.0	0.02384	2.80517
d	80.0	0.01509	2.64067
d	80.0	0.01606	2.78865
d	80.0	0.07583	2.12768
d	80.0	0.0579	2.17044
d	80.0	0.02412	2.68986
d	80.0	0.02384	2.80516
d	80.0	0.01509	2.64074
d	80.0	0.07581	2.12772
d	80.0	0.01606	2.78859
d	80.0	0.02412	2.68984
d	80.0	0.0579	2.17044
d	80.0	0.00588	2.75246
d	80.0	0.00509	2.6195
d	80.0	0.00356	2.44974
d	80.0	0.00356	2.44972
d	80.0	0.05789	2.17046
d	80.0	0.02412	2.68989
d	80.0	0.01606	2.78858
d	80.0	0.0758	2.12771
d	80.0	0.01509	2.64072
d	80.0	0.02384	2.80521
d	80.0	0.00356	2.44974
d	80.0	0.00356	2.44972
d	80.0	0.02411	2.68983
d	80.0	0.05787	2.17048
d	80.0	0.07581	2.12771
d	80.0	0.01606	2.78856
d	80.0	0.01509	2.64075
d	80.0	0.02384	2.80525
d	80.0	0.0051	2.61951
d	80.0	0.00588	2.75247
d	80.0	0.01606	2.7886
d	80.0	0.07581	2.12772
d	80.0	0.0579	2.17045
d	80.0	0.02412	2.68985
d	80.0	0.02383	2.80517
d	80.0	0.01509	2.64076
d	80.0	0.0758	2.1277
d	80.0	0.01606	2.78859
d	80.0	0.02412	2.68984
d	80.0	0.05788	2.17046
d	80.0	0.02383	2.80522
d	80.0	0.01509	2.64071
d	80.0	0.00033	3.49656
d	80.0	0.00033	3.49658
d	80.0	0.00033	3.49659
d	80.0	0.00033	3.49655
d	90.0	2.66409	1.09844
d	90.0	2.6641	1.09839
d	90.0	2.66402	1.09852
d	90.0	2.66397	1.09851
d	90.0	2.664	1.09846
d	90.0	2.66398	1.09852
d	90.0	2.66395	1.0985
d	90.0	2.66396	1.09858
d	90.0	2.63973	1.10382
d	90.0	2.63977	1.10369
d	90.0	2.63977	1.10368
d	90.0	2.63967	1.10386
d	90.0	2.50146	1.10125
d	90.0	2.50158	1.10112
d	90.0	2.50154	1.10112
d	90.0	2.50144	1.10127
d	90.0	0.00428	2.76272
d	90.0	0.00604	2.58721
d	90.0	0.01971	3.15797
d	90.0	0.00995	3.30459
d	90.0	0.00992	3.30453
d	90.0	0.01018	2.37841
d	90.0	0.00274	2.48096
d	90.0	0.00277	3.49922
d	90.0	0.01202	2.66836
d	90.0	0.02928	2.25797
d	90.0	0.00304	2.38683
d	90.0	0.00861	2.68517
d	90.0	0.02072	2.34762
d	90.0	0.03038	2.30299
d	90.0	0.01412	2.65925
d	90.0	0.01175	3.1826
d	90.0	0.00257	2.63264
d	90.0	0.01303	2.55731
d	90.0	0.02471	3.31311
d	90.0	0.01393	3.17963
d	90.0	0.02232	3.16598
d	90.0	0.02102	2.27188
d	90.0	0.02369	2.72631
d	90.0	0.01384	2.72398
d	90.0	0.06169	2.11147
d	90.0	0.00994	3.3045
d	90.0	0.00994	3.30459
d	90.0	0.01973	3.15795
d	90.0	0.00604	2.58722
d	90.0	0.01017	2.37839
d	90.0	0.00274	2.48095
d	90.0	0.02925	2.25796
d	90.0	0.01202	2.66835
d	90.0	0.00277	3.49922
d	90.0	0.00304	2.38685
d	90.0	0.02071	2.34764
d	90.0	0.00862	2.68511
d	90.0	0.01411	2.65928
d	90.0	0.03038	2.30299
d	90.0	0.01176	3.18248
d	90.0	0.00258	2.63269
d	90.0	0.02469	3.31306
d	90.0	0.01303	2.55731
d	90.0	0.02231	3.16592
d	90.0	0.01392	3.17971
d	90.0	0.02369	2.72632
d	90.0	0.02102	2.27191
d	90.0	0.06169	2.11141
d	90.0	0.01384	2.72397
d	90.0	0.00428	2.76276
d	90.0	0.01018	2.37839
d	90.0	0.01202	2.66841
d	90.0	0.00277	3.49916
d	90.0	0.02927	2.25799
d	90.0	0.00274	2.48095
d	90.0	0.00304	2.38686
d	90.0	0.03039	2.30295
d	90.0	0.01412	2.65923
d	90.0	0.00861	2.68512
d	90.0	0.02073	2.34761
d	90.0	0.00257	2.6326
d	90.0	0.01174	3.1826
d	90.0	0.01393	3.17969
d	90.0	0.02232	3.16598
d	90.0	0.0247	3.31305
d	90.0	0.01303	2.55729
d	90.0	0.01384	2.72401
d	90.0	0.06172	2.11141
d	90.0	0.02369	2.72635
d	90.0	0.02102	2.27187
d	90.0	0.01018	2.37839
d	90.0	0.02923	2.25798
d	90.0	0.00277	3.49913
d	90.0	0.01202	2.6684
d	90.0	0.00274	2.48094
d	90.0	0.00304	2.38685
d	90.0	0.01412	2.65928
d	90.0	0.03039	2.30296
d	90.0	0.02073	2.34761
d	90.0	0.00861	2.6851
d	90.0	0.00258	2.63273
d	90.0	0.01175	3.18258
d	90.0	0.02232	3.16602
d	90.0	0.01393	3.17963
d	90.0	0.01303	2.55733
d	90.0	0.02471	3.31312
d	90.0	0.06171	2.11147
d	90.0	0.01384	2.724
d	90.0	0.02103	2.27188
d	90.0	0.02369	2.72632
d	90.0	0.00428	2.76279
d	90.0	0.00603	2.58727
d	90.0	0.01975	3.15797
d	90.0	0.00994	3.3046
d	90.0	0.00999	3.30454
d	90.0	0.00304	2.3868
d	90.0	0.00274	2.48098
d	90.0	0.00277	3.49925
d	90.0	0.01203	2.66838
d	90.0	0.02926	2.2579
d	90.0	0.01175	3.1825
d	90.0	0.00258	2.63267
d	90.0	0.00861	2.68512
d	90.0	0.02071	2.3476
d	90.0	0.03038	2.30299
d	90.0	0.01411	2.65927
d	90.0	0.02102	2.27189
d	90.0	0.02369	2.7263
d	90.0	0.01384	2.724
d	90.0	0.06169	2.11139
d	90.0	0.01303	2.55727
d	90.0	0.0247	3.31302
d	90.0	0.01391	3.1797
d	90.0	0.02231	3.16594
d	90.0	0.00996	3.30457
d	90.0	0.00997	3.30455
d	90.0	0.01973	3.158
d	90.0	0.00603	2.5872
d	90.0	0.00304	2.3868
d	90.0	0.00274	2.48096
d	90.0	0.0293	2.25793
d	90.0	0.01203	2.66836
d	90.0	0.00277	3.49926
d	90.0	0.01175	3.18261
d	90.0	0.00256	2.63267
d	90.0	0.02072	2.34758
d	90.0	0.00861	2.68518
d	90.0	0.01412	2.65921
d	90.0	0.03039	2.30298
d	90.0	0.02369	2.72631
d	90.0	0.02102	2.27187
d	90.0	0.06169	2.11146
d	90.0	0.01384	2.72401
d	90.0	0.02471	3.3131
d	90.0	0.01303	2.55729
d	90.0	0.02232	3.166
d	90.0	0.01392	3.17962
d	90.0	0.00429	2.76278
d	90.0	0.00304	2.38681
d	90.0	0.01203	2.66839
d	90.0	0.00277	3.4992
d	90.0	0.02927	2.25794
d	90.0	0.00274	2.48094
d	90.0	0.00257	2.63269
d	90.0	0.01176	3.18254
d	90.0	0.03038	2.30296
d	90.0	0.01412	2.65934
d	90.0	0.00861	2.68513
d	90.0	0.02072	2.34764
d	90.0	0.01383	2.72398
d	90.0	0.06167	2.11147
d	90.0	0.02369	2.72627
d	90.0	0.02102	2.27191
d	90.0	0.0139	3.17963
d	90.0	0.02232	3.16597
d	90.0	0.02471	3.31305
d	90.0	0.01303	2.55732
d	90.0	0.00304	2.38681
d	90.0	0.02932	2.25796
d	90.0	0.00277	3.49921
d	90.0	0.01203	2.66841
d	90.0	0.00274	2.48095
d	90.0	0.00255	2.6326
d	90.0	0.01176	3.18258
d	90.0	0.01412	2.65923
d	90.0	0.0304	2.30294
d	90.0	0.02072	2.3476
d	90.0	0.00861	2.68514
d	90.0	0.06169	2.11141
d	90.0	0.01384	2.72401
d	90.0	0.02102	2.27187
d	90.0	0.02369	2.72634
d	90.0	0.02232	3.16596
d	90.0	0.0139	3.17969
d	90.0	0.01303	2.55727
d	90.0	0.02471	3.31303
d	90.0	0.00474	2.66283
d	90.0	0.03782	2.26215
d	90.0	0.01927	2.61348
d	90.0	0.01925	2.61351
d	90.0	0.01663	2.85486
d	90.0	0.01541	2.98519
d	90.0	0.00548	3.35983
d	90.0	0.00808	2.57061
d	90.0	0.02087	2.36609
d	90.0	0.0054	3.3644
d	90.0	0.00286	2.62167
d	90.0	0.00598	3.30653
d	90.0	0.02711	2.63954
d	90.0	0.01323	2.51025
d	90.0	0.0006	3.48976
d	90.0	0.00716	3.22762
d	90.0	0.09186	2.07028
d	90.0	0.05199	2.15394
d	90.0	0.03558	2.63969
d	90.0	0.01926	2.61354
d	90.0	0.01927	2.61346
d	90.0	0.03783	2.26215
d	90.0	0.01663	2.85485
d	90.0	0.00548	3.3598
d	90.0	0.01541	2.98511
d	90.0	0.00808	2.5706
d	90.0	0.02087	2.366
d	90.0	0.00287	2.62172
d	90.0	0.00541	3.36447
d	90.0	0.02711	2.63951
d	90.0	0.00598	3.30651
d	90.0	0.01323	2.51024
d	90.0	0.09183	2.0703
d	90.0	0.00716	3.2276
d	90.0	0.0006	3.48973
d	90.0	0.03558	2.63961
d	90.0	0.05197	2.15395
d	90.0	0.00473	2.66285
d	90.0	0.01664	2.85497
d	90.0	0.00808	2.57061
d	90.0	0.01542	2.98516
d	90.0	0.00549	3.3599
d	90.0	0.00539	3.36436
d	90.0	0.00287	2.62165
d	90.0	0.02086	2.36604
d	90.0	0.01323	2.51021
d	90.0	0.02711	2.63944
d	90.0	0.00598	3.3066
[truncated: 4,983 more rows]

## Sheet: Supplementary Figure 2a
Supplementary Figure 2a
zeta N2 at 70 GPa			zeta N2 at 70 GPa			zeta N2 at 70 GPa
raw data			smoothed raw data			DFT calculated spectrum
Raman shift (cm-1)	Intensity (arb. units)		Raman shift (cm-1)	Intensity (arb. units)		Raman shift (cm-1)	Intensity (arb. units)
-12.1861	3332.18		89.4237	-94.823		156.447	--
-11.5039	4370.18		90.0962	-145.156		207.096	--
-10.8218	5809.18		90.7687	-126.423		207.403	210.611
-10.1397	8966.18		91.4412	-121.252		217.316	102.535
-9.45771	13513.2		92.1135	-106.156		258.932	80.2641
-8.77577	20859.2		92.7858	-106.096		264.967	--
-8.09389	33399.2		93.4581	-101.096		273.182	--
-7.41208	32162.2		94.1302	-81.4593		273.816	--
-6.73033	23493.2		94.8023	-79.3684		279.095	149.273
-6.04865	31598.2		95.4744	-66.0957		300.107	--
-5.36703	53593.2		96.1463	-65.4593		302.276	61.4838
-4.68548	118288		96.8183	-77.0048		322.91	29.7639
-4.00399	186794		97.4901	-60.3684		329.887	3.4866
-3.32256	195673		98.1619	-68.2775		335.452	92.394
-2.6412	205084		98.8336	-72.4593		340.465	--
-1.95991	169370		99.5053	-74.9139		345.395	--
-1.27868	206717		100.177	-66.4593		359.216	19.4373
-0.59751	105344		100.848	-63.3684		370.173	205.356
0.08359	61925.2		101.52	-63.732		377.538	--
0.76463	35110.2		102.191	-54.3684		404.208	--
1.4456	16843.2		102.863	-68.4593		404.331	6.0105
2.12651	16748.2		103.534	-68.0957		408.187	335.55
2.80735	22788.2		104.205	-61.732		412.126	--
3.48813	31080.2		104.876	-67.0957		432.882	--
4.16884	11322.2		105.547	-58.5502		444.811	98.8245
4.84949	2364.18		106.218	-55.0957		447.961	826.737
5.53008	1317.18		106.889	-63.2775		463.92	--
6.2106	1095.18		107.56	-53.2775		476.043	54.2955
6.89105	919.177		108.231	-55.8229		490.58	--
7.57144	914.177		108.902	-50.1866		502.365	583.625
8.25177	763.177		109.572	-58.1866		518.937	--
8.93203	620.177		110.243	-38.0957		530.569	0.5979
9.61223	629.177		110.914	-48.8229		538.62	--
10.2924	451.177		111.584	-37.5502		565.504	--
10.9724	556.177		112.255	-23.732		577.934	--
11.6524	442.177		112.925	-16.1866		580.041	365.357
12.3324	377.177		113.595	-24.9139		594.793	136.683
13.0122	293.177		114.266	-8.18659
13.6921	344.177		114.936	-7.82295
14.3718	258.177		115.606	-6.45932
15.0515	186.177		116.276	-12.1866
15.7311	311.177		116.946	-0.36841
16.4107	111.177		117.616	-13.3684
17.0901	191.177		118.286	-4.55023
17.7696	167.177		118.956	-9.45932
18.4489	110.177		119.625	-17.9139
19.1282	179.177		120.295	-11.0048
19.8074	130.177		120.965	2.54068
20.4866	-65.823		121.634	7.08614
21.1657	132.177		122.304	10.9043
21.8448	110.177		122.973	12.177
22.5237	36.1771		123.642	32.268
23.2026	41.1771		124.312	29.9043
23.8815	98.177		124.981	55.7225
24.5602	63.1771		125.65	62.8134
25.239	-59.8229		126.319	67.6316
25.9176	74.177		126.988	70.3589
26.5962	33.1771		127.657	70.268
27.2747	-94.823		128.326	83.177
27.9532	99.177		128.995	82.0861
28.6316	-53.8229		129.664	85.6316
29.3099	-154.823		130.333	92.8134
29.9882	-106.823		131.001	89.3589
30.6664	-182.823		131.67	103.086
31.3445	-177.823		132.338	96.7225
32.0226	-202.823		133.007	101.268
32.7006	-0.82295		133.675	110.45
33.3785	-210.823		134.344	130.541
34.0564	-131.823		135.012	128.45
34.7342	-188.823		135.68	129.45
35.4119	-153.823		136.348	134.359
36.0896	-212.823		137.016	142.995
36.7672	-91.823		137.684	161.722
37.4448	-208.823		138.352	156.632
38.1223	-168.823		139.02	152.904
38.7997	-174.823		139.688	168.359
39.4771	-247.823		140.356	172.904
40.1544	-136.823		141.023	177.995
40.8316	-144.823		141.691	174.995
41.5088	-388.823		142.359	173.995
42.1859	-31.8229		143.026	199.904
42.8629	-166.823		143.694	212.813
43.5399	-232.823		144.361	216.268
44.2168	-224.823		145.028	223.268
44.8937	-204.823		145.696	245.45
45.5704	-213.823		146.363	257.541
46.2472	-151.823		147.03	249.268
46.9238	-125.823		147.697	252.541
47.6004	-199.823		148.364	264.177
48.2769	-221.823		149.031	286.904
48.9534	-165.823		149.698	301.632
49.6298	-174.823		150.365	291.813
50.3061	-122.823		151.031	298.177
50.9824	-182.823		151.698	312.723
51.6586	-138.823		152.365	304.995
52.3347	-149.823		153.031	312.723
53.0108	-96.823		153.698	323.541
53.6868	-187.823		154.364	336.177
54.3628	-178.823		155.031	365.904
55.0386	-98.823		155.697	363.177
55.7145	-202.823		156.363	356.813
56.3902	-188.823		157.029	378.632
57.0659	-163.823		157.696	388.632
57.7415	-146.823		158.362	402.723
58.4171	-54.8229		159.028	397.086
59.0926	-184.823		159.693	413.268
59.768	-165.823		160.359	414.995
60.4434	-168.823		161.025	419.995
61.1187	-233.823		161.691	429.177
61.794	-185.823		162.357	414.723
62.4691	-191.823		163.022	425.995
63.1442	-116.823		163.688	435.359
63.8193	-243.823		164.353	431.904
64.4943	-177.823		165.019	428.45
65.1692	-179.823		165.684	441.268
65.8441	-118.823		166.349	457.723
66.5189	-171.823		167.015	449.359
67.1936	-297.823		167.68	454.995
67.8683	-123.823		168.345	451.904
68.5429	-120.823		169.01	455.723
69.2174	-149.823		169.675	478.268
69.8919	-99.823		170.34	480.45
70.5663	-153.823		171.005	476.904
71.2406	-201.823		171.669	466.904
71.9149	-181.823		172.334	475.904
72.5891	-107.823		172.999	471.904
73.2633	-172.823		173.663	468.45
73.9373	-300.823		174.328	486.359
74.6114	-49.8229		174.992	482.632
75.2853	-129.823		175.657	484.086
75.9592	-189.823		176.321	501.45
76.6331	-114.823		176.985	495.723
77.3068	-132.823		177.65	501.268
77.9805	-214.823		178.314	505.177
78.6542	-101.823		178.978	513.995
79.3277	-208.823		179.642	520.541
80.0013	-130.823		180.306	516.722
80.6747	-33.8229		180.97	519.086
81.3481	-150.823		181.634	532.086
82.0214	-192.823		182.297	540.45
82.6947	-125.823		182.961	538.177
83.3679	-114.823		183.625	518.632
84.041	-109.823		184.288	520.45
84.7141	-229.823		184.952	504.632
85.3871	-90.823		185.615	501.359
86.06	-44.8229		186.279	512.541
86.7328	-89.823		186.942	516.995
87.4057	-88.823		187.605	517.45
88.0784	-213.823		188.269	522.541
88.7511	-23.8229		188.932	502.632
89.4237	-94.823		189.595	497.995
90.0962	-246.823		190.258	515.177
90.7687	-93.823		190.921	513.904
91.4412	-173.823		191.584	513.359
92.1135	-22.8229		192.246	530.722
92.7858	2.17705		192.909	527.813
93.4581	-218.823		193.572	531.541
94.1302	-15.823		194.235	525.268
94.8023	-90.823		194.897	515.45
95.4744	-17.8229		195.56	507.268
96.1463	-193.823		196.222	505.359
96.8183	-39.8229		196.884	516.177
97.4901	-30.8229		197.547	507.086
98.1619	-70.823		198.209	517.541
98.8336	-27.8229		198.871	505.268
99.5053	-15.823		199.533	505.632
100.177	-124.823		200.195	528.632
100.848	-35.8229		200.857	509.541
101.52	-102.823		201.519	506.813
102.191	-136.823		202.181	506.359
102.863	-44.8229		202.843	506.177
103.534	-100.823		203.505	503.45
104.205	-5.82295		204.167	478.541
104.876	-34.8229		204.828	478.086
105.547	32.1771		205.49	469.632
106.218	-182.823		206.151	481.995
106.889	-11.823		206.813	468.086
107.56	-54.8229		207.474	455.359
108.231	-94.823		208.135	465.086
108.902	-8.82295		208.797	463.904
109.572	-98.823		209.458	470.541
110.243	-134.823		210.119	472.995
110.914	9.17705		210.78	479.904
111.584	-33.8229		211.441	494.268
112.255	27.1771		212.102	488.45
112.925	-55.8229		212.763	487.995
113.595	38.1771		213.424	471.359
114.266	-129.823		214.084	466.813
114.936	69.177		214.745	458.541
115.606	57.1771		215.406	452.995
116.276	74.177		216.066	446.086
116.946	-194.823		216.727	447.723
117.616	49.1771		217.387	428.723
118.286	13.177		218.048	412.813
118.956	-18.8229		218.708	393.632
119.625	-35.8229		219.368	398.813
120.295	74.177		220.028	383.268
120.965	-104.823		220.688	382.359
121.634	-32.8229		221.348	386.086
122.304	15.177		222.008	374.723
122.973	-35.8229		222.668	362.359
123.642	150.177		223.328	359.632
124.312	-45.8229		223.988	339.359
124.981	99.177		224.648	337.904
125.65	55.1771		225.307	341.541
126.319	-4.82295		225.967	350.541
126.988	185.177		226.627	335.541
127.657	48.1771		227.286	340.359
128.326	179.177		227.946	345.904
128.995	45.1771		228.605	347.086
129.664	68.177		229.264	350.086
130.333	-5.82295		229.923	356.632
131.001	149.177		230.583	351.632
131.67	96.177		231.242	354.268
132.338	87.177		231.901	353.177
133.007	94.177		232.56	350.086
133.675	74.177		233.219	344.995
134.344	147.177		233.877	344.904
135.012	199.177		234.536	341.723
135.68	109.177		235.195	331.086
136.348	95.177		235.854	327.904
137.016	169.177		236.512	329.723
137.684	215.177		237.171	328.813
138.352	126.177		237.829	334.541
139.02	107.177		238.488	333.632
139.688	141.177		239.146	352.45
140.356	189.177		239.804	359.45
141.023	280.177		240.463	366.541
141.691	91.177		241.121	367.086
142.359	158.177		241.779	367.45
143.026	279.177		242.437	376.904
143.694	145.177		243.095	370.723
144.361	225.177		243.753	383.45
145.028	182.177		244.411	381.995
145.696	115.177		245.068	385.995
146.363	392.177		245.726	384.541
147.03	283.177		246.384	374.632
147.697	227.177		247.041	378.813
148.364	357.177		247.699	373.813
149.031	335.177		248.357	380.45
149.698	291.177		249.014	385.541
150.365	188.177		249.671	389.45
151.031	181.177		250.329	398.177
151.698	353.177		250.986	387.086
152.365	432.177		251.643	398.541
153.031	277.177		252.3	394.632
153.698	284.177		252.957	412.723
154.364	353.177		253.614	417.541
155.031	387.177		254.271	401.177
155.697	272.177		254.928	408.45
156.363	420.177		255.585	412.632
157.029	410.177		256.241	412.541
157.696	327.177		256.898	402.268
158.362	508.177		257.555	407.086
159.028	323.177		258.211	412.177
159.693	362.177		258.868	409.359
160.359	517.177		259.524	421.177
161.025	394.177		260.18	405.723
161.691	508.177		260.837	407.723
162.357	325.177		261.493	420.995
163.022	450.177		262.149	408.268
163.688	439.177		262.805	410.268
164.353	465.177		263.461	422.995
165.019	428.177		264.117	426.632
165.684	349.177		264.773	419.813
166.349	447.177		265.429	412.723
167.015	465.177		266.085	404.086
167.68	479.177		266.74	394.086
168.345	356.177		267.396	382.632
169.01	649.177		268.052	376.995
169.675	506.177		268.707	362.904
170.34	358.177		269.363	369.813
171.005	501.177		270.018	344.177
171.669	431.177		270.673	321.268
172.334	470.177		271.329	314.632
172.999	597.177		271.984	303.086
173.663	471.177		272.639	299.632
174.328	426.177		273.294	305.632
174.992	369.177		273.949	295.45
175.657	455.177		274.604	304.45
176.321	605.177		275.259	298.995
176.985	468.177		275.914	300.541
177.65	555.177		276.569	296.541
178.314	460.177		277.223	302.995
178.978	447.177		277.878	310.723
179.642	661.177		278.533	309.995
180.306	534.177		279.187	315.45
180.97	532.177		279.842	313.995
181.634	469.177		280.496	298.359
182.297	466.177		281.151	307.177
182.961	527.177		281.805	310.723
183.625	563.177		282.459	316.45
184.288	494.177		283.113	323.723
184.952	698.177		283.767	334.268
185.615	552.177		284.421	357.995
186.279	422.177		285.075	360.904
186.942	446.177		285.729	374.541
187.605	554.177		286.383	376.995
188.269	358.177		287.037	389.723
188.932	433.177		287.691	404.541
189.595	589.177		288.344	411.177
190.258	576.177		288.998	421.177
190.921	568.177		289.651	437.995
191.584	550.177		290.305	454.086
192.246	479.177		290.958	451.541
192.909	501.177		291.612	446.359
193.572	611.177		292.265	451.904
194.235	432.177		292.918	459.086
194.897	548.177		293.571	482.359
195.56	549.177		294.224	498.177
196.222	401.177		294.877	516.904
196.884	630.177		295.53	529.541
197.547	507.177		296.183	547.541
198.209	460.177		296.836	560.541
198.871	460.177		297.489	555.904
199.533	458.177		298.142	574.359
200.195	620.177		298.794	599.359
200.857	511.177		299.447	642.904
201.519	547.177		300.099	663.541
202.181	413.177		300.752	672.632
202.843	553.177		301.404	706.268
203.505	654.177		302.057	730.45
204.167	420.177		302.709	758.177
204.828	477.177		303.361	774.086
205.49	455.177		304.013	803.268
206.151	458.177		304.665	841.45
206.813	428.177		305.317	881.268
207.474	346.177		305.969	898.904
208.135	506.177		306.621	900.995
208.797	454.177		307.273	924.268
209.458	549.177		307.925	948.632
210.119	400.177		308.577	949.45
210.78	514.177		309.228	955.904
211.441	527.177		309.88	963.086
212.102	464.177		310.532	974.086
212.763	528.177		311.183	974.177
213.424	485.177		311.834	984.813
214.084	504.177		312.486	971.904
214.745	504.177		313.137	972.813
215.406	442.177		313.788	979.722
216.066	449.177		314.439	986.359
216.727	366.177		315.091	985.813
217.387	350.177		315.742	978.268
218.048	423.177		316.393	972.45
218.708	466.177		317.043	965.722
219.368	388.177		317.694	970.995
220.028	546.177		318.345	961.995
220.688	276.177		318.996	947.995
221.348	329.177		319.647	945.086
222.008	293.177		320.297	925.813
222.668	499.177		320.948	912.813
223.328	278.177		321.598	895.359
223.988	356.177		322.249	891.177
224.648	391.177		322.899	886.995
225.307	298.177		323.549	873.722
225.967	330.177		324.199	864.45
226.627	358.177		324.85	841.541
227.286	323.177		325.5	832.177
227.946	260.177		326.15	821.45
228.605	369.177		326.8	818.995
229.264	392.177		327.45	837.541
229.923	334.177		328.1	829.813
230.583	331.177		328.749	822.359
231.242	417.177		329.399	810.722
231.901	404.177		330.049	806.813
232.56	331.177		330.698	808.541
233.219	402.177		331.348	807.086
233.877	303.177		331.997	813.45
234.536	352.177		332.647	803.904
235.195	248.177		333.296	809.904
235.854	335.177		333.946	808.541
236.512	336.177		334.595	803.541
237.171	333.177		335.244	815.904
237.829	296.177		335.893	826.722
238.488	300.177		336.542	827.995
239.146	369.177		337.191	828.813
239.804	351.177		337.84	835.995
240.463	392.177		338.489	840.722
241.121	366.177		339.138	847.722
241.779	342.177		339.786	858.45
242.437	455.177		340.435	871.45
243.095	412.177		341.084	874.359
243.753	414.177		341.732	864.632
244.411	339.177		342.381	856.268
245.068	300.177		343.029	842.813
245.726	404.177		343.678	860.995
246.384	301.177		344.326	855.813
247.041	491.177		344.974	848.268
247.699	376.177		345.622	849.45
248.357	410.177		346.27	836.813
249.014	326.177		346.919	835.086
249.671	346.177		347.567	828.541
250.329	458.177		348.214	835.813
250.986	359.177		348.862	840.904
251.643	412.177		349.51	845.359
252.3	356.177		350.158	861.904
252.957	447.177		350.806	844.268
253.614	397.177		351.453	851.995
254.271	369.177		352.101	839.268
254.928	502.177		352.748	815.722
255.585	367.177		353.396	831.268
256.241	525.177		354.043	823.541
256.898	399.177		354.69	802.268
257.555	278.177		355.338	779.722
258.211	439.177		355.985	762.722
258.868	458.177		356.632	760.359
259.524	355.177		357.279	734.995
260.18	334.177		357.926	716.995
260.837	450.177		358.573	704.086
261.493	425.177		359.22	712.268
262.149	471.177		359.867	713.904
262.805	497.177		360.514	688.177
263.461	355.177		361.16	683.359
264.117	421.177		361.807	687.722
264.773	424.177		362.453	682.995
265.429	299.177		363.1	688.268
266.085	480.177		363.746	674.722
266.74	495.177		364.393	675.177
267.396	374.177		365.039	680.177
268.052	375.177		365.685	678.904
268.707	347.177		366.332	671.632
269.363	376.177		366.978	688.541
270.018	387.177		367.624	683.268
270.673	229.177		368.27	684.086
271.329	359.177		368.916	690.995
271.984	269.177		369.562	700.177
272.639	375.177		370.208	709.541
273.294	198.177		370.853	724.722
273.949	243.177		371.499	722.086
274.604	301.177		372.145	732.995
275.259	248.177		372.79	738.359
275.914	309.177		373.436	747.177
276.569	442.177		374.081	737.995
277.223	275.177		374.727	743.177
277.878	328.177		375.372	748.632
278.533	299.177		376.017	751.45
279.187	286.177		376.662	759.268
279.842	331.177		377.308	756.45
280.496	269.177		377.953	746.086
281.151	328.177		378.598	758.086
281.805	293.177		379.243	761.813
282.459	308.177		379.888	765.359
283.113	293.177		380.532	774.086
283.767	270.177		381.177	803.177
284.421	372.177		381.822	836.268
285.075	367.177		382.467	854.995
285.729	362.177		383.111	884.45
286.383	366.177		383.756	903.632
287.037	447.177		384.4	933.904
287.691	530.177		385.045	969.45
288.344	360.177		385.689	1004.45
288.998	443.177		386.333	1035.18
289.651	335.177		386.978	1066.27
290.305	433.177		387.622	1103.18
290.958	433.177		388.266	1128.63
291.612	445.177		388.91	1149.09
292.265	477.177		389.554	1189.36
292.918	547.177		390.198	1214.18
293.571	543.177		390.842	1241.27
294.224	419.177		391.485	1290.63
294.877	473.177		392.129	1313.54
295.53	421.177		392.773	1343.54
296.183	522.177		393.416	1384
296.836	591.177		394.06	1446.63
297.489	607.177		394.703	1469.72
298.142	639.177		395.347	1502.09
298.794	584.177		395.99	1540.54
299.447	675.177		396.634	1563.18
300.099	690.177		397.277	1581.18
300.752	492.177		397.92	1627.9
301.404	622.177		398.563	1642.81
302.057	748.177		399.206	1678.81
302.709	900.177		399.849	1714.54
303.361	749.177		400.492	1729.9
304.013	691.177		401.135	1749.72
304.665	977.177		401.778	1785.81
305.317	905.177		402.42	1813.09
305.969	889.177		403.063	1850.18
306.621	850.177		403.706	1900.18
307.273	1011.18		404.348	1934.72
307.925	912.177		404.991	1941.36
308.577	1060.18		405.633	1954
309.228	942.177		406.276	1985
309.88	923.177		406.918	2008
310.532	1005.18		407.56	2030.45
311.183	959.177		408.202	2039.09
311.834	986.177		408.845	2056.54
312.486	976.177		409.487	2078.63
313.137	968.177		410.129	2092.36
313.788	971.177		410.771	2079.72
314.439	1012.18		411.413	2084.27
315.091	1029.18		412.054	2100.81
315.742	918.177		412.696	2128.27
316.393	952.177		413.338	2123.45
317.043	999.177		413.979	2125.09
317.694	1078.18		414.621	2155.27
318.345	953.177		415.263	2167.9
318.996	903.177		415.904	2189.9
319.647	912.177		416.545	2180.54
320.297	894.177		417.187	2190.45
320.948	1029.18		417.828	2213.45
321.598	913.177		418.469	2234.45
322.249	875.177		419.11	2252.81
322.899	886.177		419.751	2256.9
323.549	740.177		420.392	2287
324.199	856.177		421.033	2304.18
324.85	886.177		421.674	2312.36
325.5	907.177		422.315	2342.09
326.15	857.177		422.956	2375.36
326.8	766.177		423.597	2424.63
327.45	792.177		424.237	2433.18
328.1	777.177		424.878	2462.72
328.749	810.177		425.519	2500.45
329.399	757.177		426.159	2542.54
330.049	859.177		426.799	2580.09
330.698	944.177		427.44	2598.63
331.348	771.177		428.08	2641.9
331.997	804.177		428.72	2674.18
332.647	779.177		429.36	2685.72
333.296	814.177		430.001	2693.18
333.946	785.177		430.641	2709.81
334.595	776.177		431.281	2740.63
335.244	847.177		431.92	2763.36
335.893	705.177		432.56	2777.63
336.542	823.177		433.2	2788.18
337.191	844.177		433.84	2801.54
337.84	889.177		434.48	2821.9
338.489	907.177		435.119	2821.81
339.138	923.177		435.759	2826.18
339.786	793.177		436.398	2820.09
340.435	823.177		437.038	2827.45
341.084	864.177		437.677	2824.27
341.732	828.177		438.316	2808.45
342.381	924.177		438.956	2795.18
343.029	823.177		439.595	2779.45
343.678	966.177		440.234	2747.9
344.326	876.177		440.873	2709.9
344.974	782.177		441.512	2674.09
345.622	815.177		442.151	2630.45
346.27	775.177		442.79	2585.45
346.919	993.177		443.429	2546
347.567	766.177		444.067	2496.27
348.214	781.177		444.706	2449.54
348.862	841.177		445.345	2397.09
349.51	785.177		445.983	2331.9
350.158	804.177		446.622	2286.27
350.806	894.177		447.26	2233.63
351.453	956.177		447.899	2188.54
352.101	838.177		448.537	2149.9
352.748	864.177		449.175	2099.09
353.396	957.177		449.813	2056.45
354.043	799.177		450.452	2019.72
354.69	851.177		451.09	1969
355.338	641.177		451.728	1918.36
355.985	582.177		452.366	1884.09
356.632	956.177		453.004	1858.45
357.279	719.177		453.641	1804.45
357.926	660.177		454.279	1774.54
358.573	708.177		454.917	1731.9
359.22	651.177		455.555	1686.27
359.867	838.177		456.192	1667.63
360.514	678.177		456.83	1645.09
361.16	601.177		457.467	1610.72
361.807	709.177		458.105	1584.81
362.453	731.177		458.742	1566.36
363.1	600.177		459.379	1547.9
363.746	673.177		460.016	1522.72
364.393	666.177		460.654	1506.63
365.039	708.177		461.291	1491.81
365.685	656.177		461.928	1492.63
366.332	709.177		462.565	1495.81
366.978	689.177		463.202	1484.45
367.624	683.177		463.839	1459.36
368.27	656.177		464.475	1458.72
368.916	695.177		465.112	1462.09
369.562	651.177		465.749	1463.36
370.208	786.177		466.385	1464.36
370.853	615.177		467.022	1463.09
371.499	675.177		467.658	1474.27
372.145	784.177		468.295	1471.54
372.79	757.177		468.931	1479.27
373.436	812.177		469.568	1478.63
374.081	856.177		470.204	1476.45
374.727	654.177		470.84	1499.9
375.372	776.177		471.476	1509.36
376.017	754.177		472.112	1504.81
376.662	748.177		472.748	1516.9
377.308	685.177		473.384	1521.18
377.953	672.177		474.02	1528.36
378.598	735.177		474.656	1541.36
379.243	815.177		475.292	1557.45
379.888	843.177		475.927	1579.54
380.532	781.177		476.563	1593.36
381.177	742.177		477.199	1610.9
381.822	786.177		477.834	1616.27
382.467	817.177		478.47	1644.72
383.111	793.177		479.105	1675.27
383.756	844.177		479.74	1682.45
384.4	1005.18		480.376	1715
385.045	1036.18		481.011	1744.36
385.689	941.177		481.646	1754.36
386.333	1139.18		482.281	1767.54
386.978	1054.18		482.916	1763.27
387.622	1114.18		483.551	1773.9
388.266	1133.18		484.186	1782.36
388.91	1171.18		484.821	1782.72
389.554	1155.18		485.456	1780.27
390.198	1135.18		486.09	1771.18
390.842	1250.18		486.725	1773.81
391.485	1285.18		487.36	1770.36
392.129	1261.18		487.994	1751.36
392.773	1384.18		488.629	1739.27
393.416	1412.18		489.263	1719.09
394.06	1352.18		489.897	1700.72
394.703	1657.18		490.532	1692.45
395.347	1385.18		491.166	1675.18
395.99	1501.18		491.8	1655
396.634	1600.18		492.434	1625.9
397.277	1824.18		493.068	1603
397.92	1504.18		493.702	1576.9
398.563	1641.18		494.336	1543
399.206	1684.18		494.97	1504.9
399.849	1633.18		495.604	1468.72
400.492	1610.18		496.238	1451.9
401.135	1866.18		496.871	1429
401.778	1821.18		497.505	1376.54
402.42	1781.18		498.139	1342.63
403.063	1894.18		498.772	1310.9
403.706	1769.18		499.406	1287.27
404.348	2042.18		500.039	1251.81
404.991	1901.18		500.672	1220.27
405.633	1941.18		501.306	1178.63
406.276	2092.18		501.939	1166.27
406.918	2183.18		502.572	1146.09
407.56	1990.18		503.205	1121.18
408.202	1939.18		503.838	1086.72
408.845	1960.18		504.471	1076.63
409.487	2122.18		505.104	1048.18
410.129	2147.18		505.737	1029.9
410.771	2016.18		506.369	998.541
411.413	2137.18		507.002	973.268
412.054	2093.18		507.635	956.086
412.696	2184.18		508.267	945.722
413.338	2243.18		508.9	926.995
413.979	2044.18		509.532	908.541
414.621	2040.18		510.165	884.813
415.263	2121.18		510.797	878.722
415.904	2262.18		511.43	859.541
416.545	2069.18		512.062	868.177
417.187	2165.18		512.694	851.904
417.828	2348.18		513.326	835.904
418.469	2276.18		513.958	831.632
419.11	2335.18		514.59	812.177
419.751	2081.18		515.222	787.177
420.392	2352.18		515.854	773.268
421.033	2297.18		516.486	770.359
421.674	2271.18		517.117	760.722
422.315	2323.18		517.749	733.177
422.956	2307.18		518.381	718.177
423.597	2400.18		519.012	692.722
424.237	2354.18		519.644	689.904
424.878	2438.18		520.275	688.177
425.519	2603.18		520.907	688.086
426.159	2701.18		521.538	674.268
426.799	2623.18		522.169	675.086
427.44	2446.18		522.8	679.45
428.08	2622.18		523.432	657.541
428.72	2686.18		524.063	650.177
429.36	2786.18		524.694	646.177
430.001	2720.18		525.325	630.268
430.641	2604.18		525.956	623.359
431.281	2830.18		526.586	616.541
431.92	2793.18		527.217	590.541
432.56	2730.18		527.848	574.45
433.2	2783.18		528.479	572.45
433.84	2806.18		529.109	586.813
434.48	2785.18		529.74	560.177
435.119	2872.18		530.37	553.722
435.759	2843.18		531.001	539.632
436.398	2902.18		531.631	546.086
437.038	2867.18		532.261	543.45
437.677	2828.18		532.891	542.45
438.316	2829.18		533.522	530.177
438.956	2841.18		534.152	543.541
439.595	2663.18		534.782	528.541
440.234	2864.18		535.412	524.359
440.873	2771.18		536.042	513.177
441.512	2611.18		536.672	517.268
442.151	2726.18		537.301	517.177
442.79	2670.18		537.931	520.45
443.429	2555.18		538.561	511.359
444.067	2449.18		539.19	519.722
444.706	2434.18		539.82	513.813
445.345	2349.18		540.45	509.904
445.983	2346.18		541.079	501.177
446.622	2229.18		541.708	517.995
447.26	2317.18		542.338	517.722
447.899	2257.18		542.967	493.904
448.537	2034.18		543.596	490.541
449.175	2009.18		544.225	484.359
449.813	2168.18		544.854	486.177
450.452	1976.18		545.483	489.904
451.09	1953.18		546.112	487.541
451.728	2009.18		546.741	485.177
452.366	1790.18		547.37	487.995
453.004	1877.18		547.999	490.632
453.641	1825.18		548.628	479.632
454.279	1759.18		549.256	478.541
454.917	1700.18		549.885	490.45
455.555	1657.18		550.513	496.177
456.192	1727.18		551.142	509.813
456.83	1574.18		551.77	511.813
457.467	1647.18		552.399	516.722
458.105	1484.18		553.027	512.813
458.742	1507.18		553.655	521.813
459.379	1585.18		554.283	531.995
460.016	1629.18		554.912	544.177
460.654	1447.18		555.54	561.45
461.291	1474.18		556.168	566.722
461.928	1497.18		556.796	585.722
462.565	1454.18		557.423	593.904
463.202	1450.18		558.051	610.359
463.839	1397.18		558.679	622.813
464.475	1484.18		559.307	627.177
465.112	1493.18		559.934	644.086
465.749	1542.18		560.562	645.995
466.385	1460.18		561.189	662.904
467.022	1353.18		561.817	678.722
467.658	1440.18		562.444	692.541
468.295	1511.18		563.072	717.177
468.931	1511.18		563.699	740.632
469.568	1465.18		564.326	762.541
470.204	1436.18		564.953	785.541
470.84	1520.18		565.58	806.177
471.476	1454.18		566.207	841.541
472.112	1578.18		566.834	876.268
472.748	1535.18		567.461	916.632
473.384	1436.18		568.088	947.359
474.02	1611.18		568.715	973.45
474.656	1544.18		569.342	1001
475.292	1461.18		569.968	1045.81
475.927	1644.18		570.595	1063.81
476.563	1512.18		571.221	1110.72
477.199	1515.18		571.848	1135.36
477.834	1663.18		572.474	1169.63
478.47	1631.18		573.101	1192
479.105	1821.18		573.727	1218.54
479.74	1687.18		574.353	1252
480.376	1629.18		574.979	1289.9
481.011	1670.18		575.606	1321.9
481.646	1857.18		576.232	1350.36
482.281	1797.18		576.858	1367.63
482.916	1723.18		577.484	1403.27
483.551	1870.18		578.109	1412.54
484.186	1838.18		578.735	1434.72
484.821	1773.18		579.361	1457.45
485.456	1776.18		579.987	1485
486.09	1774.18		580.612	1498.27
486.725	1804.18		581.238	1525.72
487.36	1722.18		581.864	1532.45
487.994	1674.18		582.489	1548.54
488.629	1830.18		583.114	1577.09
489.263	1697.18		583.74	1597.36
489.897	1752.18		584.365	1598.18
490.532	1832.18		584.99	1627.63
491.166	1629.18		585.615	1637.63
491.8	1640.18		586.241	1653.27
492.434	1554.18		586.866	1663.27
493.068	1572.18		587.491	1683.9
493.702	1713.18		588.115	1680.72
494.336	1532.18		588.74	1682.18
494.97	1452.18		589.365	1686
495.604	1510.18		589.99	1664.45
496.238	1445.18		590.615	1660.18
496.871	1465.18		591.239	1655
497.505	1459.18		591.864	1622.9
498.139	1210.18		592.488	1609
498.772	1242.18		593.113	1589.09
499.406	1369.18		593.737	1576.18
500.039	1320.18		594.361	1560.81
500.672	1136.18		594.986	1525
501.306	1159.18		595.61	1481.36
501.939	1103.18		596.234	1451.81
502.572	1250.18		596.858	1435.45
503.205	1055.18		597.482	1403.45
503.838	1118.18		598.106	1381.54
504.471	1001.18		598.73	1347.09
505.104	1074.18		599.354	1322.27
505.737	1020.18		599.978	1279.27
506.369	1095.18		600.601	1243.63
507.002	941.177		601.225	1201.72
507.635	1025.18		601.849	1175.18
508.267	846.177		602.472	1169.45
508.9	902.177		603.096	1125.72
509.532	905.177		603.719	1095.36
510.165	777.177		604.342	1067.45
510.797	929.177		604.966	1022.81
511.43	887.177		605.589	1007.63
512.062	868.177		606.212	974.268
512.694	817.177		606.835	948.813
513.326	834.177		607.458	914.359
513.958	874.177		608.081	883.359
514.59	814.177		608.704	864.177
515.222	941.177		609.327	831.632
515.854	723.177		609.95	823.086
516.486	729.177		610.573	799.268
517.117	730.177		611.195	773.086
517.749	715.177		611.818	772.45
518.381	612.177		612.441	741.268
519.012	715.177		613.063	720.722
519.644	785.177		613.686	701.177
520.275	728.177		614.308	681.177
520.907	571.177		614.93	678.632
521.538	649.177		615.553	669.722
522.169	661.177		616.175	639.541
522.8	692.177		616.797	622.541
523.432	710.177		617.419	613.45
524.063	729.177		618.041	608.632
524.694	563.177		618.663	582.086
525.325	621.177		619.285	569.904
525.956	763.177		619.907	567.268
526.586	544.177		620.529	578.722
527.217	647.177		621.151	569.904
527.848	527.177		621.772	555.268
528.479	474.177		622.394	545.45
529.109	585.177		623.015	552.995
529.74	617.177		623.637	542.541
530.37	424.177		624.258	544.904
531.001	552.177		624.88	527.268
531.631	541.177		625.501	515.541
532.261	779.177		626.122	519.086
532.891	470.177		626.744	515.359
533.522	473.177		627.365	506.45
534.152	492.177		627.986	505.541
534.782	598.177		628.607	497.904
535.412	445.177		629.228	491.541
536.042	574.177		629.849	488.268
536.672	482.177		630.47	483.813
537.301	571.177		631.09	472.086
537.931	387.177		631.711	470.268
538.561	495.177		632.332	479.541
539.19	656.177		632.952	470.904
539.82	515.177		633.573	473.995
540.45	472.177		634.193	463.723
541.079	528.177		634.814	464.995
541.708	498.177		635.434	458.723
542.338	537.177		636.054	443.268
542.967	509.177		636.675	436.632
543.596	439.177		637.295	438.086
544.225	475.177		637.915	429.813
544.854	572.177		638.535	431.45
545.483	492.177		639.155	422.904
546.112	394.177		639.775	432.541
546.741	478.177		640.395	429.995
547.37	404.177		641.015	433.268
547.999	548.177		641.635	428.086
548.628	539.177		642.254	437.541
549.256	511.177		642.874	446.541
549.885	483.177		643.494	465.177
550.513	470.177		644.113	456.813
551.142	504.177		644.733	465.359
551.77	451.177		645.352	447.268
552.399	480.177		645.971	455.541
553.027	525.177		646.591	457.359
553.655	541.177		647.21	445.086
554.283	554.177		647.829	444.995
554.912	570.177		648.448	444.086
555.54	593.177		649.067	439.086
556.168	468.177		649.686	441.177
556.796	582.177		650.305	426.359
557.423	582.177		650.924	426.813
558.051	638.177		651.543	412.359
558.679	641.177		652.162	416.813
559.307	538.177		652.78	413.086
559.934	734.177		653.399	406.45
560.562	631.177		654.017	412.268
561.189	735.177		654.636	406.541
561.817	707.177		655.254	407.086
562.444	641.177		655.873	398.086
563.072	654.177		656.491	399.995
563.699	603.177		657.109	397.177
564.326	768.177		657.728	405.541
564.953	812.177		658.346	426.268
565.58	793.177		658.964	423.45
566.207	809.177		659.582	430.813
566.834	992.177		660.2	435.813
567.461	872.177		660.818	425.086
568.088	988.177		661.436	426.359
568.715	934.177		662.054	424.995
569.342	1030.18		662.671	437.359
569.968	1036.18		663.289	433.723
570.595	1047.18		663.907	425.45
571.221	1106.18		664.524	427.268
571.848	1099.18		665.142	406.723
572.474	1096.18		665.759	415.086
573.101	1302.18		666.377	414.268
573.727	1190.18		666.994	413.086
574.353	1388.18		667.611	414.086
574.979	1259.18		668.228	412.723
575.606	1311.18		668.845	419.45
576.232	1276.18		669.463	417.632
576.858	1328.18		670.08	420.813
577.484	1415.18		670.697	439.904
578.109	1523.18		671.313	442.177
578.735	1451.18		671.93	451.268
579.361	1409.18		672.547	450.086
579.987	1492.18		673.164	442.086
580.612	1582.18		673.781	448.813
581.238	1490.18		674.397	465.177
581.864	1503.18		675.014	445.359
582.489	1561.18		675.63	453.632
583.114	1579.18		676.247	448.359
583.74	1474.18		676.863	448.995
584.365	1717.18		677.479	445.541
584.99	1597.18		678.096	446.177
585.615	1628.18		678.712	437.268
586.241	1723.18		679.328	446.359
586.866	1715.18		679.944	450.177
587.491	1591.18		680.56	441.359
588.115	1814.18		681.176	443.086
588.74	1613.18		681.792	453.359
589.365	1733.18		682.408	440.632
589.99	1689.18		683.023	446.086
590.615	1701.18		683.639	454.359
591.239	1682.18		684.255	461.904
591.864	1613.18		684.87	454.541
592.488	1670.18		685.486	463.541
593.113	1486.18		686.102	461.632
593.737	1668.18		686.717	463.904
594.361	1534.18		687.332	464.723
594.986	1461.18		687.948	448.268
595.61	1460.18		688.563	469.45
596.234	1514.18		689.178	470.45
596.858	1547.18		689.793	466.541
597.482	1532.18		690.408	448.541
598.106	1288.18		691.023	437.45
598.73	1133.18		691.638	444.723
599.354	1345.18		692.253	442.995
599.978	1306.18		692.868	452.359
600.601	1316.18		693.483	448.086
601.225	1293.18		694.097	455.177
601.849	1082.18		694.712	460.268
602.472	1187.18		695.327	446.995
603.096	1041.18		695.941	453.632
603.719	1155.18		696.556	458.813
604.342	1071.18		697.17	459.177
604.966	996.177		697.784	474.632
605.589	1070.18		698.399	478.995
606.212	864.177		699.013	480.541
606.835	972.177		699.627	482.45
607.458	1009.18		700.241	484.995
608.081	802.177		700.855	487.995
608.704	915.177		701.469	493.359
609.327	820.177		702.083	492.632
609.95	761.177		702.697	497.813
610.573	776.177		703.311	501.086
611.195	730.177		703.925	510.813
611.818	785.177		704.538	494.632
612.441	712.177		705.152	493.632
613.063	770.177		705.766	490.177
613.686	710.177		706.379	477.086
614.308	721.177		706.993	475.541
614.93	795.177		707.606	472.359
615.553	572.177		708.219	478.632
616.175	594.177		708.833	488.995
616.797	546.177		709.446	484.086
617.419	556.177		710.059	478.177
618.041	702.177		710.672	482.813
618.663	687.177		711.285	491.45
619.285	380.177		711.898	490.723
619.907	583.177		712.511	494.995
620.529	610.177		713.124	506.995
621.151	668.177		713.737	517.722
621.772	503.177		714.35	513.086
622.394	438.177		714.962	505.268
623.015	565.177		715.575	515.359
623.637	672.177		716.188	512.359
624.258	459.177		716.8	518.45
624.88	541.177		717.413	514.813
625.501	579.177		718.025	508.632
626.122	463.177		718.637	519.995
626.744	468.177		719.25	531.086
627.365	636.177		719.862	537.359
627.986	474.177		720.474	534.541
628.607	374.177		721.086	547.995
629.228	477.177		721.698	551.813
629.849	524.177		722.31	535.177
630.47	574.177		722.922	544.268
631.09	449.177		723.534	555.359
631.711	457.177		724.146	559.995
632.332	509.177		724.758	574.359
632.952	427.177		725.369	564.722
633.573	419.177		725.981	569.177
634.193	507.177		726.592	563.177
634.814	454.177		727.204	575.995
635.434	476.177		727.815	559.904
636.054	382.177		728.427	556.086
636.675	558.177		729.038	566.722
637.295	461.177		729.649	565.268
637.915	463.177		730.261	546.45
638.535	388.177		730.872	547.904
639.155	339.177		731.483	543.541
639.775	354.177		732.094	541.359
640.395	435.177		732.705	542.904
641.015	416.177		733.316	550.268
641.635	472.177		733.927	538.177
642.254	382.177		734.538	538.541
642.874	488.177		735.148	553.086
643.494	530.177		735.759	551.995
644.113	497.177		736.37	560.177
644.733	406.177		736.98	568.904
645.352	492.177		737.591	560.722
645.971	438.177		738.201	557.722
646.591	559.177		738.812	556.995
647.21	343.177		739.422	555.632
647.829	510.177		740.032	543.359
648.448	273.177		740.642	543.541
649.067	473.177		741.253	558.177
649.686	508.177		741.863	558.45
650.305	395.177		742.473	554.632
650.924	496.177		743.083	554.541
651.543	396.177		743.693	563.541
652.162	437.177		744.303	582.359
652.78	461.177		744.912	584.359
653.399	396.177		745.522	598.268
654.017	348.177		746.132	587.177
654.636	351.177		746.741	588.632
655.254	322.177		747.351	592.268
655.873	432.177		747.961	596.177
656.491	435.177		748.57	588.813
657.109	459.177		749.179	597.904
657.728	433.177		749.789	588.904
658.346	402.177		750.398	584.722
658.964	338.177		751.007	578.632
659.582	482.177		751.616	587.904
660.2	365.177		752.225	574.359
660.818	440.177		752.835	585.177
661.436	579.177		753.444	589.086
662.054	291.177		754.052	597.995
662.671	513.177		754.661	590.268
663.289	490.177		755.27	596.45
663.907	341.177		755.879	597.268
664.524	447.177		756.488	614.813
665.142	387.177		757.096	618.904
665.759	474.177		757.705	619.541
666.377	442.177		758.313	609.177
666.994	274.177		758.922	617.086
667.611	460.177		759.53	618.632
668.228	353.177		760.138	641.541
668.845	383.177		760.747	632.995
669.463	504.177		761.355	627.813
670.08	477.177		761.963	637.995
670.697	352.177		762.571	634.722
671.313	432.177		763.179	628.45
671.93	461.177		763.787	631.268
672.547	454.177		764.395	635.359
673.164	477.177		765.003	628.541
673.781	484.177		765.611	627.359
674.397	485.177		766.219	638.541
675.014	453.177		766.826	624.45
675.63	370.177		767.434	628.904
676.247	416.177		768.041	640.177
676.863	551.177		768.649	636.813
677.479	532.177		769.256	646.177
678.096	214.177		769.864	647.086
678.712	552.177		770.471	651.541
679.328	396.177		771.078	639.45
679.944	484.177		771.686	651.995
680.56	446.177		772.293	666.541
681.176	492.177		772.9	649.541
681.792	355.177		773.507	656.268
682.408	470.177		774.114	645.086
683.023	458.177		774.721	645.086
683.639	454.177		775.328	647.904
684.255	551.177		775.935	641.995
684.87	327.177		776.541	641.813
685.486	412.177		777.148	629.268
686.102	456.177		777.755	637.722
686.717	575.177		778.361	652.177
687.332	529.177		778.968	643.813
687.948	411.177		779.574	648.904
688.563	454.177		780.181	640.904
689.178	449.177		780.787	645.177
689.793	483.177		781.393	633.177
690.408	463.177		781.999	617.904
691.023	370.177		782.606	623.45
691.638	560.177		783.212	625.086
692.253	423.177		783.818	635.995
692.868	413.177		784.424	635.722
693.483	377.177		785.03	623.177
694.097	407.177		785.636	615.45
694.712	491.177		786.241	622.813
695.327	435.177		786.847	619.904
695.941	552.177		787.453	628.722
696.556	436.177		788.058	633.177
697.17	541.177		788.664	640.177
697.784	426.177		789.27	633.541
698.399	414.177		789.875	619.632
699.013	496.177		790.48	602.359
699.627	470.177		791.086	608.904
700.241	381.177		791.691	612.359
700.855	577.177		792.296	608.722
701.469	539.177		792.901	595.45
702.083	452.177		793.507	583.995
702.697	573.177		794.112	580.359
703.311	464.177		794.717	586.086
703.925	574.177		795.322	581.086
704.538	485.177		795.926	577.813
705.152	406.177		796.531	583.995
705.766	553.177		797.136	601.904
706.379	506.177		797.741	581.359
706.993	488.177		798.345	569.086
707.606	399.177		798.95	572.955
708.219	528.177		799.554	577.748
708.833	414.177		800.159	567.377
709.446	429.177		800.763	552.51
710.059	447.177		801.368	500.177
710.672	539.177
711.285	554.177
711.898	520.177
712.511	499.177
713.124	441.177
713.737	539.177
714.35	494.177
714.962	520.177
715.575	461.177
716.188	561.177
716.8	565.177
717.413	488.177
718.025	468.177
718.637	631.177
719.25	466.177
719.862	508.177
720.474	499.177
721.086	426.177
721.698	645.177
722.31	583.177
722.922	630.177
723.534	534.177
724.146	636.177
724.758	510.177
725.369	448.177
725.981	566.177
726.592	630.177
727.204	550.177
727.815	584.177
728.427	539.177
729.038	632.177
729.649	564.177
730.261	675.177
730.872	459.177
731.483	468.177
732.094	565.177
732.705	550.177
733.316	423.177
733.927	566.177
734.538	536.177
735.148	515.177
735.759	649.177
736.37	645.177
736.98	542.177
737.591	463.177
738.201	628.177
738.812	553.177
739.422	640.177
740.032	519.177
740.642	476.177
741.253	503.177
741.863	507.177
742.473	634.177
743.083	510.177
743.693	544.177
744.303	624.177
744.912	631.177
745.522	511.177
746.132	639.177
746.741	618.177
747.351	683.177
747.961	525.177
748.57	660.177
749.179	512.177
749.789	526.177
750.398	584.177
751.007	667.177
751.616	550.177
752.225	611.177
752.835	540.177
753.444	572.177
754.052	616.177
754.661	627.177
755.27	511.177
755.879	631.177
756.488	569.177
757.096	682.177
757.705	582.177
758.313	618.177
758.922	620.177
759.53	733.177
760.138	617.177
760.747	623.177
761.355	513.177
761.963	598.177
762.571	648.177
763.179	821.177
763.787	588.177
764.395	525.177
765.003	730.177
765.611	584.177
766.219	664.177
766.826	648.177
767.434	668.177
768.041	438.177
768.649	585.177
769.256	771.177
769.864	666.177
770.471	637.177
771.078	649.177
771.686	693.177
772.293	687.177
772.9	674.177
773.507	697.177
774.114	535.177
774.721	576.177
775.328	745.177
775.935	584.177
776.541	740.177
777.148	514.177
777.755	649.177
778.361	724.177
778.968	622.177
779.574	672.177
780.181	559.177
780.787	628.177
781.393	735.177
781.999	653.177
782.606	640.177
783.212	652.177
783.818	561.177
784.424	517.177
785.03	556.177
785.636	683.177
786.241	690.177
786.847	679.177
787.453	625.177
788.058	597.177
788.664	568.177
789.27	721.177
789.875	620.177
790.48	658.177
791.086	566.177
791.691	633.177
792.296	610.177
792.901	537.177
793.507	489.177
794.112	697.177
794.717	635.177
795.322	528.177
795.926	575.177
796.531	494.177
797.136	618.177
797.741	629.177
798.345	578.177
798.95	574.177
799.554	605.177
800.159	686.177
800.763	471.177
801.368	500.177
801.972	674.177
802.576	531.177
803.18	446.177
803.785	663.177
804.389	539.177
804.993	684.177
805.597	628.177
806.2	643.177
806.804	479.177
807.408	617.177
808.012	521.177
808.615	533.177
809.219	641.177
809.822	677.177
810.426	663.177
811.029	643.177
811.633	639.177
812.236	496.177
812.839	583.177
813.442	670.177
814.046	549.177
814.649	602.177
815.252	735.177
815.855	702.177
816.457	634.177
817.06	583.177
817.663	644.177
818.266	639.177
818.868	601.177
819.471	634.177
820.074	777.177
820.676	520.177
821.279	678.177
821.881	625.177
822.483	605.177
823.085	643.177
823.688	736.177
824.29	521.177
824.892	611.177
825.494	614.177
826.096	546.177
826.698	739.177
827.3	667.177
827.901	680.177
828.503	630.177
829.105	726.177
829.706	634.177
830.308	637.177
830.909	728.177
831.511	487.177
832.112	679.177
832.713	778.177
833.315	516.177
833.916	720.177
834.517	666.177
835.118	554.177
835.719	597.177
836.32	641.177
836.921	658.177
837.522	683.177
838.123	553.177
838.723	643.177
839.324	703.177
839.925	642.177
840.525	705.177
841.126	537.177
841.726	580.177
842.327	836.177
842.927	588.177
843.527	712.177
844.127	563.177
844.728	621.177
845.328	808.177

## Sheet: Supplementary Figure 2b
Supplementary Figure 2b
zeta N2 at 70 GPa				zeta N2 at 70 GPa
raw data				DFT calculated spectrum
Raman shift (cm-1)	Intensity (arb. units)			Raman shift (cm-1)	Intensity (arb. units)
2063.17	-1978.75			2389.95	31664.3
2063.69	-1838.75			2409.95	--
2064.21	-1855.75			2429.38	33.4566
2064.72	-1935.75			2442.77	4569.46
2065.24	-1977.75			2453.8	--
2065.76	-1873.75			2454.9	--
2066.28	-2044.75			2461.53	362.534
2066.8	-1828.75			2471.83	844.863
2067.32	-1932.75
2067.83	-1983.75
2068.35	-1903.75
2068.87	-1586.75
2069.39	-2023.75
2069.91	-1850.75
2070.42	-2076.75
2070.94	-2079.75
2071.46	-1724.75
2071.98	-1956.75
2072.5	-1896.75
2073.01	-2001.75
2073.53	-1929.75
2074.05	-1915.75
2074.57	-2004.75
2075.08	-1862.75
2075.6	-2051.75
2076.12	-2000.75
2076.64	-1920.75
2077.15	-1978.75
2077.67	-1842.75
2078.19	-1893.75
2078.71	-1979.75
2079.22	-1985.75
2079.74	-1865.75
2080.26	-1821.75
2080.77	-2069.75
2081.29	-1998.75
2081.81	-1791.75
2082.33	-1937.75
2082.84	-1934.75
2083.36	-2070.75
2083.88	-2097.75
2084.39	-1763.75
2084.91	-1986.75
2085.43	-2082.75
2085.94	-1937.75
2086.46	-1844.75
2086.98	-1835.75
2087.49	-1994.75
2088.01	-2057.75
2088.53	-2010.75
2089.04	-1908.75
2089.56	-2017.75
2090.07	-2032.75
2090.59	-1930.75
2091.11	-2102.75
2091.62	-2059.75
2092.14	-2014.75
2092.65	-2002.75
2093.17	-1922.75
2093.69	-2161.75
2094.2	-1840.75
2094.72	-2067.75
2095.23	-2025.75
2095.75	-2040.75
2096.27	-1912.75
2096.78	-2084.75
2097.3	-2147.75
2097.81	-1981.75
2098.33	-1911.75
2098.84	-1893.75
2099.36	-2210.75
2099.87	-1978.75
2100.39	-1922.75
2100.9	-1929.75
2101.42	-2117.75
2101.94	-1963.75
2102.45	-1734.75
2102.97	-2046.75
2103.48	-1970.75
2104	-2088.75
2104.51	-1781.75
2105.03	-1953.75
2105.54	-2068.75
2106.06	-1780.75
2106.57	-1992.75
2107.08	-1912.75
2107.6	-1968.75
2108.11	-1857.75
2108.63	-1841.75
2109.14	-2117.75
2109.66	-2055.75
2110.17	-1688.75
2110.69	-1847.75
2111.2	-1951.75
2111.72	-1918.75
2112.23	-1892.75
2112.74	-1860.75
2113.26	-1956.75
2113.77	-1935.75
2114.29	-1949.75
2114.8	-1953.75
2115.31	-1888.75
2115.83	-1930.75
2116.34	-1876.75
2116.86	-2022.75
2117.37	-1908.75
2117.88	-1991.75
2118.4	-1806.75
2118.91	-2003.75
2119.43	-1779.75
2119.94	-1915.75
2120.45	-1912.75
2120.97	-1815.75
2121.48	-1862.75
2121.99	-1956.75
2122.51	-1878.75
2123.02	-1915.75
2123.53	-1861.75
2124.05	-1871.75
2124.56	-1900.75
2125.07	-1819.75
2125.59	-1898.75
2126.1	-1805.75
2126.61	-1718.75
2127.12	-1888.75
2127.64	-1915.75
2128.15	-1699.75
2128.66	-1608.75
2129.18	-1869.75
2129.69	-1790.75
2130.2	-1751.75
2130.71	-1824.75
2131.23	-1888.75
2131.74	-1854.75
2132.25	-1820.75
2132.76	-1885.75
2133.28	-1673.75
2133.79	-1906.75
2134.3	-1710.75
2134.81	-1666.75
2135.33	-1776.75
2135.84	-1744.75
2136.35	-1788.75
2136.86	-1824.75
2137.37	-1762.75
2137.89	-1819.75
2138.4	-1811.75
2138.91	-1814.75
2139.42	-1813.75
2139.93	-1816.75
2140.45	-1774.75
2140.96	-1522.75
2141.47	-1732.75
2141.98	-1717.75
2142.49	-1725.75
2143	-1729.75
2143.52	-1747.75
2144.03	-1718.75
2144.54	-1756.75
2145.05	-1753.75
2145.56	-1777.75
2146.07	-1790.75
2146.58	-1888.75
2147.09	-1679.75
2147.61	-1786.75
2148.12	-1710.75
2148.63	-1776.75
2149.14	-1710.75
2149.65	-1787.75
2150.16	-1739.75
2150.67	-1611.75
2151.18	-1780.75
2151.69	-1717.75
2152.2	-1732.75
2152.72	-1649.75
2153.23	-1608.75
2153.74	-1745.75
2154.25	-1573.75
2154.76	-1729.75
2155.27	-1730.75
2155.78	-1696.75
2156.29	-1632.75
2156.8	-1727.75
2157.31	-1710.75
2157.82	-1733.75
2158.33	-1750.75
2158.84	-1772.75
2159.35	-1722.75
2159.86	-1567.75
2160.37	-1726.75
2160.88	-1724.75
2161.39	-1661.75
2161.9	-1650.75
2162.41	-1564.75
2162.92	-1767.75
2163.43	-1768.75
2163.94	-1677.75
2164.45	-1686.75
2164.96	-1707.75
2165.47	-1595.75
2165.98	-1703.75
2166.49	-1543.75
2167	-1723.75
2167.51	-1596.75
2168.01	-1531.75
2168.52	-1686.75
2169.03	-1622.75
2169.54	-1752.75
2170.05	-1518.75
2170.56	-1647.75
2171.07	-1692.75
2171.58	-1761.75
2172.09	-1739.75
2172.6	-1650.75
2173.11	-1684.75
2173.61	-1512.75
2174.12	-1621.75
2174.63	-1548.75
2175.14	-1544.75
2175.65	-1630.75
2176.16	-1681.75
2176.67	-1645.75
2177.18	-1720.75
2177.68	-1515.75
2178.19	-1684.75
2178.7	-1637.75
2179.21	-1734.75
2179.72	-1524.75
2180.23	-1745.75
2180.73	-1591.75
2181.24	-1607.75
2181.75	-1533.75
2182.26	-1449.75
2182.77	-1736.75
2183.27	-1546.75
2183.78	-1452.75
2184.29	-1687.75
2184.8	-1592.75
2185.31	-1559.75
2185.81	-1600.75
2186.32	-1637.75
2186.83	-1634.75
2187.34	-1531.75
2187.84	-1500.75
2188.35	-1571.75
2188.86	-1549.75
2189.37	-1558.75
2189.87	-1511.75
2190.38	-1640.75
2190.89	-1714.75
2191.4	-1536.75
2191.9	-1576.75
2192.41	-1477.75
2192.92	-1568.75
2193.42	-1619.75
2193.93	-1642.75
2194.44	-1498.75
2194.95	-1628.75
2195.45	-1622.75
2195.96	-1487.75
2196.47	-1645.75
2196.97	-1474.75
2197.48	-1538.75
2197.99	-1715.75
2198.49	-1524.75
2199	-1265.75
2199.51	-1597.75
2200.01	-1515.75
2200.52	-1488.75
2201.03	-1488.75
2201.53	-1524.75
2202.04	-1476.75
2202.54	-1525.75
2203.05	-1345.75
2203.56	-1550.75
2204.06	-1479.75
2204.57	-1466.75
2205.07	-1388.75
2205.58	-1511.75
2206.09	-1625.75
2206.59	-1479.75
2207.1	-1594.75
2207.6	-1546.75
2208.11	-1518.75
2208.62	-1430.75
2209.12	-1411.75
2209.63	-1544.75
2210.13	-1387.75
2210.64	-1521.75
2211.14	-1532.75
2211.65	-1554.75
2212.15	-1381.75
2212.66	-1509.75
2213.17	-1601.75
2213.67	-1517.75
2214.18	-1271.75
2214.68	-1519.75
2215.19	-1584.75
2215.69	-1531.75
2216.2	-1568.75
2216.7	-1539.75
2217.21	-1377.75
2217.71	-1458.75
2218.22	-1518.75
2218.72	-1333.75
2219.23	-1458.75
2219.73	-1387.75
2220.24	-1472.75
2220.74	-1618.75
2221.24	-1713.75
2221.75	-1478.75
2222.25	-1420.75
2222.76	-1510.75
2223.26	-1456.75
2223.77	-1511.75
2224.27	-1341.75
2224.78	-1460.75
2225.28	-1345.75
2225.78	-1490.75
2226.29	-1320.75
2226.79	-1429.75
2227.3	-1507.75
2227.8	-1462.75
2228.3	-1366.75
2228.81	-1441.75
2229.31	-1358.75
2229.82	-1411.75
2230.32	-1387.75
2230.82	-1399.75
2231.33	-1433.75
2231.83	-1457.75
2232.33	-1635.75
2232.84	-1300.75
2233.34	-1260.75
2233.84	-1456.75
2234.35	-1489.75
2234.85	-1177.75
2235.35	-1294.75
2235.86	-1338.75
2236.36	-1332.75
2236.86	-1358.75
2237.37	-1552.75
2237.87	-1360.75
2238.37	-1481.75
2238.88	-1442.75
2239.38	-1482.75
2239.88	-1556.75
2240.39	-1464.75
2240.89	-1285.75
2241.39	-1498.75
2241.89	-1246.75
2242.4	-1508.75
2242.9	-1143.75
2243.4	-1503.75
2243.9	-1371.75
2244.41	-1255.75
2244.91	-1246.75
2245.41	-1311.75
2245.91	-1327.75
2246.42	-1258.75
2246.92	-1370.75
2247.42	-1329.75
2247.92	-1322.75
2248.43	-1288.75
2248.93	-1286.75
2249.43	-1241.75
2249.93	-1330.75
2250.43	-1239.75
2250.94	-1254.75
2251.44	-1372.75
2251.94	-1251.75
2252.44	-1487.75
2252.94	-1412.75
2253.45	-1380.75
2253.95	-1274.75
2254.45	-1287.75
2254.95	-1212.75
2255.45	-1399.75
2255.95	-1265.75
2256.45	-1408.75
2256.96	-1266.75
2257.46	-1406.75
2257.96	-1237.75
2258.46	-1313.75
2258.96	-1375.75
2259.46	-1257.75
2259.96	-1334.75
2260.46	-1359.75
2260.97	-1155.75
2261.47	-1297.75
2261.97	-1368.75
2262.47	-1211.75
2262.97	-1149.75
2263.47	-1192.75
2263.97	-1327.75
2264.47	-1226.75
2264.97	-1238.75
2265.47	-1180.75
2265.97	-1307.75
2266.47	-1306.75
2266.98	-1175.75
2267.48	-1133.75
2267.98	-1208.75
2268.48	-1233.75
2268.98	-1173.75
2269.48	-1217.75
2269.98	-1164.75
2270.48	-1132.75
2270.98	-1303.75
2271.48	-1202.75
2271.98	-1296.75
2272.48	-1161.75
2272.98	-1294.75
2273.48	-1121.75
2273.98	-1115.75
2274.48	-1209.75
2274.98	-1078.75
2275.48	-1135.75
2275.98	-1260.75
2276.48	-1352.75
2276.98	-1269.75
2277.48	-1186.75
2277.98	-1232.75
2278.47	-1203.75
2278.97	-1108.75
2279.47	-1324.75
2279.97	-1198.75
2280.47	-1105.75
2280.97	-1040.75
2281.47	-1090.75
2281.97	-1021.75
2282.47	-1129.75
2282.97	-1195.75
2283.47	-1212.75
2283.97	-1103.75
2284.47	-1220.75
2284.96	-1204.75
2285.46	-1125.75
2285.96	-1213.75
2286.46	-1170.75
2286.96	-1061.75
2287.46	-1218.75
2287.96	-1042.75
2288.46	-1274.75
2288.95	-1116.75
2289.45	-1148.75
2289.95	-1138.75
2290.45	-1138.75
2290.95	-1116.75
2291.45	-1048.75
2291.94	-1088.75
2292.44	-1024.75
2292.94	-1072.75
2293.44	-1096.75
2293.94	-1030.75
2294.43	-1070.75
2294.93	-1072.75
2295.43	-1090.75
2295.93	-1024.75
2296.43	-1161.75
2296.92	-911.746
2297.42	-1198.75
2297.92	-1071.75
2298.42	-922.746
2298.92	-1147.75
2299.41	-922.746
2299.91	-1136.75
2300.41	-939.746
2300.91	-1102.75
2301.4	-1076.75
2301.9	-996.746
2302.4	-914.746
2302.9	-1145.75
2303.39	-1107.75
2303.89	-969.746
2304.39	-1034.75
2304.88	-1116.75
2305.38	-972.746
2305.88	-1025.75
2306.37	-1027.75
2306.87	-983.746
2307.37	-957.746
2307.87	-1061.75
2308.36	-846.746
2308.86	-962.746
2309.36	-1048.75
2309.85	-1113.75
2310.35	-890.746
2310.85	-1032.75
2311.34	-972.746
2311.84	-1011.75
2312.34	-882.746
2312.83	-832.746
2313.33	-883.746
2313.82	-1188.75
2314.32	-915.746
2314.82	-938.746
2315.31	-897.746
2315.81	-942.746
2316.31	-1028.75
2316.8	-1040.75
2317.3	-1021.75
2317.79	-799.746
2318.29	-791.746
2318.79	-923.746
2319.28	-924.746
2319.78	-1102.75
2320.27	-986.746
2320.77	-752.746
2321.26	-952.746
2321.76	-873.746
2322.26	-869.746
2322.75	-1041.75
2323.25	-802.746
2323.74	-945.746
2324.24	-883.746
2324.73	-915.746
2325.23	-1021.75
2325.72	-815.746
2326.22	-732.746
2326.71	-826.746
2327.21	-950.746
2327.7	-997.746
2328.2	-739.746
2328.69	-701.746
2329.19	-990.746
2329.68	-884.746
2330.18	-770.746
2330.67	-835.746
2331.17	-697.746
2331.66	-837.746
2332.16	-757.746
2332.65	-730.746
2333.15	-972.746
2333.64	-722.746
2334.14	-837.746
2334.63	-948.746
2335.12	-741.746
2335.62	-783.746
2336.11	-805.746
2336.61	-846.746
2337.1	-692.746
2337.6	-923.746
2338.09	-887.746
2338.58	-686.746
2339.08	-976.746
2339.57	-766.746
2340.07	-556.746
2340.56	-566.746
2341.05	-736.746
2341.55	-717.746
2342.04	-794.746
2342.54	-717.746
2343.03	-869.746
2343.52	-567.746
2344.02	-789.746
2344.51	-497.746
2345	-716.746
2345.5	-912.746
2345.99	-823.746
2346.48	-677.746
2346.98	-765.746
2347.47	-603.746
2347.96	-874.746
2348.46	-757.746
2348.95	-576.746
2349.44	-638.746
2349.94	-776.746
2350.43	-640.746
2350.92	-815.746
2351.42	-828.746
2351.91	-652.746
2352.4	-623.746
2352.89	-764.746
2353.39	-860.746
2353.88	-779.746
2354.37	-581.746
2354.86	-665.746
2355.36	-727.746
2355.85	-618.746
2356.34	-557.746
2356.84	-734.746
2357.33	-682.746
2357.82	-460.746
2358.31	-600.746
2358.8	-490.746
2359.3	-553.746
2359.79	-612.746
2360.28	-706.746
2360.77	-512.746
2361.27	-596.746
2361.76	-687.746
2362.25	-648.746
2362.74	-522.746
2363.23	-763.746
2363.73	-468.746
2364.22	-631.746
2364.71	-539.746
2365.2	-571.746
2365.69	-492.746
2366.18	-419.746
2366.68	-489.746
2367.17	-515.746
2367.66	-629.746
2368.15	-307.746
2368.64	-491.746
2369.13	-334.746
2369.62	-338.746
2370.12	-392.746
2370.61	-383.746
2371.1	-234.746
2371.59	-358.746
2372.08	-270.746
2372.57	-333.746
2373.06	-335.746
2373.55	-177.746
2374.04	-224.746
2374.53	-341.746
2375.03	-266.746
2375.52	-234.746
2376.01	-327.746
2376.5	-287.746
2376.99	-97.7459
2377.48	-265.746
2377.97	-300.746
2378.46	-230.746
2378.95	-289.746
2379.44	-238.746
2379.93	-231.746
2380.42	-266.746
2380.91	-300.746
2381.4	-128.746
2381.89	-346.746
2382.38	67.2541
2382.87	-104.746
2383.36	-282.746
2383.85	-115.746
2384.34	-174.746
2384.83	26.2541
2385.32	-88.7459
2385.81	-255.746
2386.3	38.2541
2386.79	-17.7459
2387.28	426.254
2387.77	-85.7459
2388.26	98.2541
2388.75	188.254
2389.24	246.254
2389.73	410.254
2390.22	283.254
2390.71	560.254
2391.2	521.254
2391.69	642.254
2392.18	458.254
2392.67	792.254
2393.16	923.254
2393.64	783.254
2394.13	925.254
2394.62	1322.25
2395.11	1030.25
2395.6	1543.25
2396.09	1458.25
2396.58	1831.25
2397.07	1836.25
2397.56	2323.25
2398.04	2380.25
2398.53	2734.25
2399.02	3156.25
2399.51	3702.25
2400	4546.25
2400.49	5077.25
2400.98	6227.25
2401.47	7422.25
2401.95	9112.25
2402.44	11353.3
2402.93	13715.3
2403.42	16193.3
2403.91	19045.3
2404.39	22517.3
2404.88	26343.3
2405.37	30182.3
2405.86	33877.3
2406.35	37602.3
2406.84	40238.3
2407.32	42396.3
2407.81	44988.3
2408.3	45577.3
2408.79	45230.3
2409.27	43947.3
2409.76	42190.3
2410.25	40592.3
2410.74	38216.3
2411.22	35260.3
2411.71	32511.3
2412.2	29823.3
2412.69	26881.3
2413.17	24380.3
2413.66	22458.3
2414.15	19526.3
2414.64	17600.3
2415.12	15577.3
2415.61	14002.3
2416.1	12188.3
2416.59	11099.3
2417.07	9602.25
2417.56	8255.25
2418.05	7711.25
2418.53	6680.25
2419.02	6225.25
2419.51	5512.25
2419.99	4981.25
2420.48	4674.25
2420.97	4663.25
2421.45	4563.25
2421.94	4390.25
2422.43	4298.25
2422.91	4477.25
2423.4	4725.25
2423.89	4820.25
2424.37	5531.25
2424.86	5969.25
2425.35	7193.25
2425.83	8303.25
2426.32	9797.25
2426.8	12219.3
2427.29	14487.3
2427.78	17023.3
2428.26	19442.3
2428.75	22103.3
2429.23	22311.3
2429.72	22021.3
2430.21	19195.3
2430.69	15384.3
2431.18	12741.3
2431.66	9472.25
2432.15	6963.25
2432.63	5563.25
2433.12	4550.25
2433.61	4126.25
2434.09	3981.25
2434.58	3931.25
2435.06	3809.25
2435.55	3928.25
2436.03	3953.25
2436.52	4173.25
2437	4137.25
2437.49	3977.25
2437.97	3665.25
2438.46	3368.25
2438.94	2896.25
2439.43	2530.25
2439.91	2287.25
2440.4	1844.25
2440.88	1544.25
2441.37	1323.25
2441.85	942.254
2442.34	1183.25
2442.82	1085.25
2443.31	777.254
2443.79	808.254
2444.28	809.254
2444.76	516.254
2445.25	570.254
2445.73	370.254
2446.22	577.254
2446.7	533.254
2447.18	555.254
2447.67	522.254
2448.15	617.254
2448.64	338.254
2449.12	367.254
2449.6	480.254
2450.09	442.254
2450.57	504.254
2451.06	596.254
2451.54	469.254
2452.02	414.254
2452.51	539.254
2452.99	492.254
2453.48	446.254
2453.96	562.254
2454.44	497.254
2454.93	543.254
2455.41	839.254
2455.89	670.254
2456.38	383.254
2456.86	691.254
2457.34	659.254
2457.83	833.254
2458.31	764.254
2458.79	941.254
2459.28	998.254
2459.76	1013.25
2460.24	1058.25
2460.73	1202.25
2461.21	1508.25
2461.69	2020.25
2462.18	2319.25
2462.66	3100.25
2463.14	3577.25
2463.63	4769.25
2464.11	6020.25
2464.59	7266.25
2465.07	8350.25
2465.56	8827.25
2466.04	8917.25
2466.52	8220.25
2467	7351.25
2467.49	6075.25
2467.97	4828.25
2468.45	3747.25
2468.93	2877.25
2469.42	2209.25
2469.9	1423.25
2470.38	1297.25
2470.86	1045.25
2471.34	1030.25
2471.83	836.254
2472.31	583.254
2472.79	654.254
2473.27	536.254
2473.76	543.254
2474.24	792.254
2474.72	599.254
2475.2	573.254
2475.68	446.254
2476.16	890.254
2476.65	603.254
2477.13	493.254
2477.61	502.254
2478.09	492.254
2478.57	598.254
2479.05	570.254
2479.53	625.254
2480.02	685.254
2480.5	669.254
2480.98	519.254
2481.46	507.254
2481.94	590.254
2482.42	702.254
2482.9	650.254
2483.38	431.254
2483.87	467.254
2484.35	641.254
2484.83	520.254
2485.31	653.254
2485.79	485.254
2486.27	413.254
2486.75	713.254
2487.23	657.254
2487.71	782.254
2488.19	607.254
2488.67	596.254
2489.15	637.254
2489.63	565.254
2490.11	669.254
2490.6	725.254
2491.08	563.254
2491.56	720.254
2492.04	667.254
2492.52	504.254
2493	699.254
2493.48	771.254
2493.96	708.254
2494.44	837.254
2494.92	619.254
2495.4	662.254
2495.88	798.254
2496.36	731.254
2496.84	812.254
2497.32	910.254
2497.8	669.254
2498.28	665.254
2498.76	646.254
2499.24	1012.25
2499.71	635.254
2500.19	629.254
2500.67	736.254
2501.15	748.254
2501.63	657.254
2502.11	696.254
2502.59	846.254
2503.07	851.254
2503.55	652.254
2504.03	790.254
2504.51	796.254
2504.99	757.254
2505.47	727.254
2505.95	1014.25
2506.42	716.254
2506.9	811.254
2507.38	772.254
2507.86	684.254
2508.34	894.254
2508.82	983.254
2509.3	947.254
2509.78	712.254
2510.25	847.254
2510.73	874.254
2511.21	947.254
2511.69	876.254
2512.17	994.254
2512.65	865.254
2513.13	683.254
2513.6	941.254
2514.08	1053.25
2514.56	801.254
2515.04	920.254
2515.52	915.254
2515.99	972.254
2516.47	963.254
2516.95	847.254
2517.43	1023.25
2517.91	821.254
2518.38	912.254
2518.86	1037.25
2519.34	840.254
2519.82	926.254
2520.3	780.254
2520.77	992.254
2521.25	983.254
2521.73	1163.25
2522.21	924.254
2522.68	862.254
2523.16	972.254
2523.64	948.254
2524.12	939.254
2524.59	944.254
2525.07	899.254
2525.55	875.254
2526.03	954.254
2526.5	895.254
2526.98	871.254
2527.46	846.254
2527.93	1057.25
2528.41	892.254
2528.89	1083.25
2529.36	1143.25
2529.84	960.254
2530.32	1120.25
2530.79	932.254
2531.27	1021.25
2531.75	995.254
2532.23	1015.25
2532.7	962.254
2533.18	1002.25
2533.65	833.254
2534.13	931.254
2534.61	1060.25
2535.08	970.254
2535.56	1115.25
2536.04	882.254
2536.51	1171.25
2536.99	873.254
2537.47	1077.25
2537.94	1201.25
2538.42	1092.25
2538.89	879.254
2539.37	1165.25
2539.85	903.254
2540.32	1213.25
2540.8	1107.25
2541.27	942.254
2541.75	1113.25
2542.22	1096.25
2542.7	1084.25
2543.18	1108.25
2543.65	1155.25
2544.13	1024.25
2544.6	1241.25
2545.08	979.254
2545.55	1110.25
2546.03	1138.25
2546.5	1229.25
2546.98	1234.25
2547.45	1159.25
2547.93	1279.25
2548.41	1202.25
2548.88	1159.25
2549.36	1112.25
2549.83	1022.25
2550.31	1178.25
2550.78	1261.25
2551.26	1252.25
2551.73	1088.25
2552.2	1208.25
2552.68	974.254
2553.15	1152.25
2553.63	1194.25
2554.1	1109.25
2554.58	1149.25
2555.05	1220.25
2555.53	1107.25
2556	1037.25
2556.48	1508.25
2556.95	1193.25
2557.43	1168.25
2557.9	1221.25
2558.37	991.254
2558.85	1290.25
2559.32	1225.25
2559.8	1057.25
2560.27	1318.25
2560.74	1315.25
2561.22	1153.25
2561.69	1231.25
2562.17	1412.25
2562.64	1105.25
2563.11	1233.25
2563.59	1162.25
2564.06	1185.25
2564.54	1170.25
2565.01	1533.25
2565.48	1289.25
2565.96	1020.25
2566.43	1240.25
2566.9	1433.25
2567.38	1067.25
2567.85	1307.25
2568.32	1365.25
2568.8	1371.25
2569.27	1200.25
2569.74	1381.25
2570.22	1276.25
2570.69	1276.25
2571.16	1292.25
2571.64	1313.25
2572.11	1384.25
2572.58	1335.25
2573.05	1369.25
2573.53	1326.25
2574	1154.25
2574.47	1414.25
2574.95	1299.25
2575.42	1422.25
2575.89	1184.25
2576.36	1276.25
2576.84	1393.25
2577.31	1378.25
2577.78	1230.25
2578.25	1336.25
2578.73	1375.25
2579.2	1311.25
2579.67	1354.25
2580.14	1342.25
2580.62	1473.25
2581.09	1235.25
2581.56	1135.25
2582.03	1456.25
2582.5	1483.25
2582.98	1413.25
2583.45	1294.25
2583.92	1371.25
2584.39	1340.25
2584.86	1368.25
2585.34	1332.25
2585.81	1365.25
2586.28	1399.25
2586.75	1395.25
2587.22	1319.25
2587.69	1334.25
2588.17	1379.25
2588.64	1644.25
2589.11	1248.25
2589.58	1347.25
2590.05	1447.25
2590.52	1448.25
2590.99	1389.25
2591.47	1398.25
2591.94	1277.25
2592.41	1264.25
2592.88	1342.25
2593.35	1387.25
2593.82	1307.25
2594.29	1395.25
2594.76	1534.25
2595.23	1355.25
2595.7	1605.25
2596.18	1536.25
2596.65	1371.25
2597.12	1504.25
2597.59	1465.25
2598.06	1472.25
2598.53	1499.25
2599	1465.25
2599.47	1466.25
2599.94	1245.25
2600.41	1315.25
2600.88	1456.25
2601.35	1543.25
2601.82	1421.25
2602.29	1310.25
2602.76	1373.25
2603.23	1336.25
2603.7	1485.25
2604.17	1571.25
2604.64	1331.25
2605.11	1345.25
2605.58	1458.25
2606.05	1332.25
2606.52	1374.25
2606.99	1451.25
2607.46	1469.25
2607.93	1430.25
2608.4	1577.25
2608.87	1457.25
2609.34	1462.25
2609.81	1386.25
2610.28	1375.25
2610.75	1469.25
2611.22	1287.25
2611.69	1471.25
2612.16	1311.25
2612.63	1480.25
2613.1	1452.25
2613.57	1260.25
2614.04	1396.25
2614.5	1510.25
2614.97	1509.25
2615.44	1447.25
2615.91	1511.25
2616.38	1475.25
2616.85	1585.25
2617.32	1616.25
2617.79	1479.25
2618.26	1558.25
2618.73	1578.25
2619.19	1600.25
2619.66	1384.25
2620.13	1657.25
2620.6	1487.25
2621.07	1434.25
2621.54	1635.25
2622.01	1387.25
2622.47	1582.25
2622.94	1625.25
2623.41	1692.25
2623.88	1496.25
2624.35	1566.25
2624.82	1668.25
2625.28	1511.25
2625.75	1595.25
2626.22	1597.25
2626.69	1393.25
2627.16	1767.25
2627.62	1619.25
2628.09	1494.25
2628.56	1562.25
2629.03	1308.25
2629.5	1476.25
2629.96	1617.25
2630.43	1495.25
2630.9	1566.25
2631.37	1590.25
2631.83	1535.25
2632.3	1507.25
2632.77	1488.25
2633.24	1247.25
2633.7	1638.25
2634.17	1541.25
2634.64	1176.25
2635.11	1513.25
2635.57	1601.25
2636.04	1748.25
2636.51	1578.25
2636.97	1686.25
2637.44	1435.25
2637.91	1638.25
2638.38	1325.25
2638.84	1538.25
2639.31	1513.25
2639.78	1469.25
2640.24	1511.25
2640.71	1654.25
2641.18	1429.25
2641.64	1480.25
2642.11	1463.25
2642.58	1401.25
2643.04	1522.25
2643.51	1515.25
2643.98	1342.25
2644.44	1481.25
2644.91	1566.25
2645.37	1546.25
2645.84	1501.25
2646.31	1537.25
2646.77	1782.25
2647.24	1421.25
2647.71	1393.25
2648.17	1525.25
2648.64	1511.25
2649.1	1450.25
2649.57	1532.25
2650.04	1605.25
2650.5	1432.25
2650.97	1514.25
2651.43	1465.25
2651.9	1535.25
2652.37	1566.25
2652.83	1605.25
2653.3	1518.25
2653.76	1644.25
2654.23	1649.25
2654.69	1771.25
2655.16	1583.25
2655.62	1233.25
2656.09	1486.25
2656.55	1669.25
2657.02	1540.25
2657.48	1709.25
2657.95	1473.25
2658.42	1505.25
2658.88	1765.25
2659.35	1669.25
2659.81	1323.25
2660.28	1555.25
2660.74	1490.25
2661.21	1479.25
2661.67	1527.25
2662.14	1498.25
2662.6	1550.25
2663.06	1703.25
2663.53	1494.25
2663.99	1546.25
2664.46	1498.25
2664.92	1565.25
2665.39	1642.25
2665.85	1675.25
2666.32	1510.25
2666.78	1582.25
2667.25	1691.25
2667.71	1562.25
2668.17	1554.25
2668.64	1627.25
2669.1	1546.25
2669.57	1625.25
2670.03	1674.25
2670.49	1434.25
2670.96	1655.25
2671.42	1499.25
2671.89	1556.25
2672.35	1424.25
2672.81	1568.25
2673.28	1478.25
2673.74	1639.25
2674.21	1466.25
2674.67	1611.25
2675.13	1602.25
2675.6	1600.25
2676.06	1476.25
2676.52	1580.25
2676.99	1602.25
2677.45	1558.25
2677.91	1640.25
2678.38	1671.25
2678.84	1559.25
2679.3	1438.25
2679.77	1557.25
2680.23	1622.25
2680.69	1386.25
2681.16	1571.25
2681.62	1510.25
2682.08	1530.25
2682.54	1675.25
2683.01	1495.25
2683.47	1705.25
2683.93	1509.25
2684.4	1596.25
2684.86	1430.25
2685.32	1466.25
2685.78	1711.25
2686.25	1485.25
2686.71	1508.25
2687.17	1436.25
2687.63	1483.25
2688.1	1525.25
2688.56	1608.25
2689.02	1506.25
2689.48	1530.25
2689.95	1565.25
2690.41	1458.25
2690.87	1410.25
2691.33	1612.25
2691.79	1383.25
2692.26	1416.25
2692.72	1418.25
2693.18	1509.25
2693.64	1533.25
2694.1	1544.25
2694.57	1296.25
2695.03	1357.25
2695.49	1242.25
2695.95	1356.25
2696.41	1548.25
2696.88	1589.25
2697.34	1407.25
2697.8	1375.25
2698.26	1382.25
2698.72	1311.25
2699.18	1513.25
2699.64	1596.25
2700.11	1324.25
2700.57	1388.25
2701.03	1458.25
2701.49	1348.25
2701.95	1431.25
2702.41	1561.25
2702.87	1293.25
2703.33	1414.25
2703.79	1422.25
2704.26	1350.25
2704.72	1596.25
2705.18	1467.25
2705.64	1482.25
2706.1	1327.25
2706.56	1374.25
2707.02	1587.25
2707.48	1494.25
2707.94	1396.25
2708.4	1249.25
2708.86	1305.25
2709.32	1318.25
2709.78	1431.25
2710.24	1514.25
2710.7	1275.25
2711.17	1221.25
2711.63	1500.25
2712.09	1246.25
2712.55	1428.25
2713.01	1381.25
2713.47	1306.25
2713.93	1217.25
2714.39	1579.25
2714.85	1540.25
2715.31	1320.25
2715.77	1387.25
2716.23	1382.25
2716.69	1138.25
2717.15	1256.25
2717.61	1297.25

## Sheet: Supplementary Figure 7a
Supplementary Figure 7a
zeta-N2 80 GPa
powder data provided by Gregoryanz from his 2007 paper
2theta	Observed Intensity	2theta	Calculated Intensity	2theta	Difference between observed and calculated intensity	2theta position of tick marks
8.9946	1	8.9946	11.92	8.9946	-347.807	9.9086	-72.5105
9.0068	1	9.0068	11.94	9.0068	-347.827	9.9599	-72.5105
9.019	1	9.019	11.96	9.019	-347.847	10.5179	-72.5105
9.0312	1	9.0312	12.03	9.0312	-347.917	10.6935	-72.5105
9.0433	1	9.0433	11.77	9.0433	-347.657	10.7292	-72.5105
9.0555	1	9.0555	11.51	9.0555	-347.397	11.0544	-72.5105
9.0677	3	9.0677	11.25	9.0677	-345.137	11.1269	-72.5105
9.0799	11	9.0799	10.99	9.0799	-336.877	11.4789	-72.5105
9.0921	6	9.0921	10.73	9.0921	-341.617	11.5122	-72.5105
9.1043	5	9.1043	10.47	9.1043	-342.357	11.7277	-72.5105
9.1165	5	9.1165	10.22	9.1165	-342.107	12.1794	-72.5105
9.1286	5	9.1286	9.96	9.1286	-341.847	12.438	-72.5105
9.1408	7	9.1408	9.71	9.1408	-339.597	12.5637	-72.5105
9.153	7	9.153	9.46	9.153	-339.347	12.5964	-72.5105
9.1652	10	9.1652	9.21	9.1652	-336.097	12.9063	-72.5105
9.1774	13	9.1774	8.96	9.1774	-332.847	13.1113	-72.5105
9.1896	13	9.1896	8.71	9.1896	-332.597	13.4315	-72.5105
9.2018	13	9.2018	8.46	9.2018	-332.347	13.533	-72.5105
9.2139	9	9.2139	8.22	9.2139	-336.107	14.6754	-72.5105
9.2261	12	9.2261	7.97	9.2261	-332.857	14.9635	-72.5105
9.2383	9	9.2383	7.73	9.2383	-335.617	15.0311	-72.5105
9.2505	9	9.2505	7.49	9.2505	-335.377	15.0882	-72.5105
9.2627	13	9.2627	7.25	9.2627	-331.137	15.1209	-72.5105
9.2749	12	9.2749	7.02	9.2749	-331.907	15.2805	-72.5105
9.2871	12	9.2871	7	9.2871	-331.887	15.3498	-72.5105
9.2992	8	9.2992	6.77	9.2992	-335.657	15.3475	-72.5105
9.3114	6	9.3114	6.55	9.3114	-337.437	15.3587	-72.5105
9.3236	6	9.3236	6.33	9.3236	-337.217	15.3592	-72.5105
9.3358	9	9.3358	6.11	9.3358	-333.997	15.6579	-72.5105
9.348	10	9.348	5.9	9.348	-332.787	15.8341	-72.5105
9.3602	17	9.3602	5.69	9.3602	-325.577	0	0
9.3724	14	9.3724	5.48	9.3724	-328.367	0	0
9.3845	14	9.3845	5.29	9.3845	-328.177	0	0
9.3967	7	9.3967	5.09	9.3967	-334.977	0	0
9.4089	3	9.4089	4.9	9.4089	-338.787	0	0
9.4211	1	9.4211	4.72	9.4211	-340.607	0	0
9.4333	1	9.4333	4.42	9.4333	-340.307	0	0
9.4455	1	9.4455	3.96	9.4455	-339.847	0	0
9.4577	1	9.4577	3.5	9.4577	-339.387	0	0
9.4698	1	9.4698	3.17	9.4698	-339.057	0	0
9.482	1	9.482	2.74	9.482	-338.627	0	0
9.4942	1	9.4942	2.31	9.4942	-338.197	0	0
9.5064	1	9.5064	1.9	9.5064	-337.787	0	0
9.5186	1	9.5186	1.49	9.5186	-337.377	0	0
9.5308	3	9.5308	1.11	9.5308	-334.997	0	0
9.543	2	9.543	0.73	9.543	-335.617	0	0
9.5552	2	9.5552	0.38	9.5552	-335.267	0	0
9.5673	4	9.5673	0.04	9.5673	-332.927	0	0
9.5795	4	9.5795	-0.27	9.5795	-332.617	0	0
9.5917	5	9.5917	-0.55	9.5917	-331.337	0	0
9.6039	6	9.6039	-0.79	9.6039	-330.097	0	0
9.6161	1	9.6161	-0.99	9.6161	-334.897	0	0
9.6283	1	9.6283	-1.13	9.6283	-334.757	0	0
9.6405	1	9.6405	-1.18	9.6405	-334.707	0	0
9.6526	1	9.6526	-1.1	9.6526	-334.787	0	0
9.6648	1	9.6648	-0.83	9.6648	-335.057	0	0
9.677	1	9.677	-0.28	9.677	-335.607	0	0
9.6892	2	9.6892	1.53	9.6892	-336.417	0	0
9.7014	3	9.7014	5.5	9.7014	-339.387	0	0
9.7136	10	9.7136	10.39	9.7136	-337.277	0	0
9.7258	17	9.7258	16.59	9.7258	-336.477	0	0
9.7379	30	9.7379	24.62	9.7379	-331.507	0	0
9.7501	45	9.7501	35.14	9.7501	-327.027	0	0
9.7623	55	9.7623	48.94	9.7623	-330.827	0	0
9.7745	68	9.7745	66.93	9.7745	-335.817	0	0
9.7867	88	9.7867	90.1	9.7867	-338.987	0	0
9.7989	108	9.7989	119.42	9.7989	-348.307	0	0
9.8111	139	9.8111	155.78	9.8111	-353.667	0	0
9.8232	178	9.8232	199.79	9.8232	-358.677	0	0
9.8354	229	9.8354	251.63	9.8354	-359.517	0	0
9.8476	292	9.8476	310.94	9.8476	-355.827	0	0
9.8598	363	9.8598	376.63	9.8598	-350.517	0	0
9.872	440	9.872	446.81	9.872	-343.697	0	0
9.8842	522	9.8842	518.81	9.8842	-333.697	0	0
9.8964	595	9.8964	589.25	9.8964	-331.137	0	0
9.9085	671	9.9085	654.6	9.9085	-320.487	0	0
9.9207	731	9.9207	710.2	9.9207	-316.087	0	0
9.9329	773	9.9329	752.47	9.9329	-316.357	0	0
9.9451	810	9.9451	778.16	9.9451	-305.047	0	0
9.9573	810	9.9573	785.07	9.9573	-311.957	0	0
9.9695	795	9.9695	772.56	9.9695	-314.447	0	0
9.9817	744	9.9817	741.72	9.9817	-334.607	0	0
9.9938	688	9.9938	695.23	9.9938	-344.117	0	0
10.006	615	10.006	636.86	10.006	-358.747	0	0
10.0182	546	10.0182	570.86	10.0182	-361.747	0	0
10.0304	477	10.0304	501.42	10.0304	-361.307	0	0
10.0426	408	10.0426	432.36	10.0426	-361.247	0	0
10.0548	351	10.0548	366.85	10.0548	-352.737	0	0
10.067	297	10.067	307.21	10.067	-347.097	0	0
10.0791	249	10.0791	254.97	10.0791	-342.857	0	0
10.0913	212	10.0913	210.85	10.0913	-335.737	0	0
10.1035	182	10.1035	174.86	10.1035	-329.747	0	0
10.1157	159	10.1157	146.52	10.1157	-324.407	0	0
10.1279	146	10.1279	124.97	10.1279	-315.857	0	0
10.1401	136	10.1401	109.18	10.1401	-310.067	0	0
10.1523	130	10.1523	98.08	10.1523	-304.967	0	0
10.1645	123	10.1645	90.65	10.1645	-304.537	0	0
10.1766	111	10.1766	86	10.1766	-311.887	0	0
10.1888	97	10.1888	83.4	10.1888	-323.287	0	0
10.201	85	10.201	82.25	10.201	-334.137	0	0
10.2132	77	10.2132	82.14	10.2132	-342.027	0	0
10.2254	77	10.2254	82.75	10.2254	-342.637	0	0
10.2376	78	10.2376	83.91	10.2376	-342.797	0	0
10.2498	78	10.2498	85.65	10.2498	-344.537	0	0
10.2619	77	10.2619	88	10.2619	-347.887	0	0
10.2741	74	10.2741	90.82	10.2741	-353.707	0	0
10.2863	75	10.2863	94.25	10.2863	-356.137	0	0
10.2985	81	10.2985	98.71	10.2985	-354.597	0	0
10.3107	86	10.3107	104.09	10.3107	-354.977	0	0
10.3229	93	10.3229	110.98	10.3229	-354.867	0	0
10.3351	105	10.3351	119.9	10.3351	-351.787	0	0
10.3472	112	10.3472	131.4	10.3472	-356.287	0	0
10.3594	127	10.3594	146.09	10.3594	-355.977	0	0
10.3716	141	10.3716	164.56	10.3716	-360.447	0	0
10.3838	159	10.3838	187.32	10.3838	-365.207	0	0
10.396	181	10.396	214.66	10.396	-370.547	0	0
10.4082	210	10.4082	246.58	10.4082	-373.467	0	0
10.4204	246	10.4204	282.71	10.4204	-373.597	0	0
10.4325	283	10.4325	322.22	10.4325	-376.107	0	0
10.4447	324	10.4447	363.79	10.4447	-376.677	0	0
10.4569	370	10.4569	405.7	10.4569	-372.587	0	0
10.4691	412	10.4691	445.86	10.4691	-370.747	0	0
10.4813	455	10.4813	482	10.4813	-363.887	0	0
10.4935	493	10.4935	511.92	10.4935	-355.807	0	0
10.5057	522	10.5057	533.72	10.5057	-348.607	0	0
10.5178	546	10.5178	546.22	10.5178	-337.107	0	0
10.53	554	10.53	549.2	10.53	-332.087	0	0
10.5422	559	10.5422	543.55	10.5422	-321.437	0	0
10.5544	560	10.5544	531.09	10.5544	-307.977	0	0
10.5666	560	10.5666	514.18	10.5666	-291.067	0	0
10.5788	562	10.5788	495.34	10.5788	-270.227	0	0
10.591	559	10.591	476.85	10.591	-254.737	0	0
10.6031	556	10.6031	460.55	10.6031	-241.437	0	0
10.6153	550	10.6153	447.59	10.6153	-234.477	0	0
10.6275	547	10.6275	438.4	10.6275	-228.287	0	0
10.6397	544	10.6397	432.67	10.6397	-225.557	0	0
10.6519	540	10.6519	429.46	10.6519	-226.347	0	0
10.6641	524	10.6641	427.36	10.6641	-240.247	0	0
10.6763	505	10.6763	424.76	10.6763	-256.647	0	0
10.6885	479	10.6885	420.12	10.6885	-278.007	0	0
10.7006	448	10.7006	412.29	10.7006	-301.177	0	0
10.7128	413	10.7128	400.72	10.7128	-324.607	0	0
10.725	376	10.725	385.49	10.725	-346.377	0	0
10.7372	342	10.7372	367.2	10.7372	-362.087	0	0
10.7494	311	10.7494	346.81	10.7494	-372.697	0	0
10.7616	275	10.7616	325.41	10.7616	-387.297	0	0
10.7738	251	10.7738	304.1	10.7738	-389.987	0	0
10.7859	225	10.7859	283.84	10.7859	-395.727	0	0
10.7981	207	10.7981	265.43	10.7981	-395.317	0	0
10.8103	190	10.8103	249.42	10.8103	-396.307	0	0
10.8225	180	10.8225	236.1	10.8225	-392.987	0	0
10.8347	176	10.8347	225.56	10.8347	-386.447	0	0
10.8469	173	10.8469	219.08	10.8469	-382.967	0	0
10.8591	171	10.8591	215.31	10.8591	-381.197	0	0
10.8712	172	10.8712	213.84	10.8712	-378.727	0	0
10.8834	175	10.8834	214.5	10.8834	-376.387	0	0
10.8956	189	10.8956	217.17	10.8956	-365.057	0	0
10.9078	199	10.9078	221.92	10.9078	-359.807	0	0
10.92	211	10.92	228.94	10.92	-354.827	0	0
10.9322	224	10.9322	238.66	10.9322	-351.547	0	0
10.9444	238	10.9444	251.64	10.9444	-350.527	0	0
10.9565	258	10.9565	268.64	10.9565	-347.527	0	0
10.9687	279	10.9687	290.71	10.9687	-348.597	0	0
10.9809	307	10.9809	318.26	10.9809	-348.147	0	0
10.9931	338	10.9931	352.22	10.9931	-351.107	0	0
11.0053	371	11.0053	393.03	11.0053	-358.917	0	0
11.0175	406	11.0175	440.68	11.0175	-371.567	0	0
11.0297	450	11.0297	494.58	11.0297	-381.467	0	0
11.0418	493	11.0418	553.42	11.0418	-397.307	0	0
11.054	544	11.054	615.15	11.054	-408.037	0	0
11.0662	604	11.0662	677.04	11.0662	-409.927	0	0
11.0784	659	11.0784	735.78	11.0784	-413.667	0	0
11.0906	716	11.0906	787.69	11.0906	-408.577	0	0
11.1028	754	11.1028	829.11	11.1028	-411.997	0	0
11.115	794	11.115	856.82	11.115	-399.707	0	0
11.1271	818	11.1271	868.55	11.1271	-387.437	0	0
11.1393	834	11.1393	863.52	11.1393	-366.407	0	0
11.1515	842	11.1515	842.53	11.1515	-337.417	0	0
11.1637	837	11.1637	808.01	11.1637	-307.897	0	0
11.1759	824	11.1759	763.16	11.1759	-276.047	0	0
11.1881	798	11.1881	711.66	11.1881	-250.547	0	0
11.2003	765	11.2003	656.82	11.2003	-228.707	0	0
11.2124	727	11.2124	602.66	11.2124	-212.547	0	0
11.2246	679	11.2246	551.55	11.2246	-209.437	0	0
11.2368	629	11.2368	505.69	11.2368	-213.577	0	0
11.249	572	11.249	466.12	11.249	-231.007	0	0
11.2612	523	11.2612	433.62	11.2612	-247.507	0	0
11.2734	470	11.2734	408.31	11.2734	-275.197	0	0
11.2856	427	11.2856	389.9	11.2856	-299.787	0	0
11.2977	386	11.2977	377.92	11.2977	-328.807	0	0
11.3099	356	11.3099	371.83	11.3099	-352.717	0	0
11.3221	332	11.3221	371.16	11.3221	-376.047	0	0
11.3343	316	11.3343	372.15	11.3343	-393.037	0	0
11.3465	314	11.3465	372.61	11.3465	-395.497	0	0
11.3587	311	11.3587	378.16	11.3587	-404.047	0	0
11.3709	330	11.3709	388.93	11.3709	-395.817	0	0
11.3831	349	11.3831	405.05	11.3831	-392.937	0	0
11.3952	376	11.3952	426.55	11.3952	-387.437	0	0
11.4074	413	11.4074	453.05	11.4074	-376.937	0	0
11.4196	448	11.4196	483.89	11.4196	-372.777	0	0
11.4318	493	11.4318	517.9	11.4318	-361.787	0	0
11.444	537	11.444	553.4	11.444	-353.287	0	0
11.4562	581	11.4562	588.27	11.4562	-344.157	0	0
11.4684	622	11.4684	620.03	11.4684	-334.917	0	0
11.4805	652	11.4805	646.05	11.4805	-330.937	0	0
11.4927	674	11.4927	663.79	11.4927	-326.677	0	0
11.5049	683	11.5049	671.18	11.5049	-325.067	0	0
11.5171	683	11.5171	666.98	11.5171	-320.867	0	0
11.5293	671	11.5293	651.09	11.5293	-316.977	0	0
11.5415	647	11.5415	624.56	11.5415	-314.447	0	0
11.5537	613	11.5537	589.35	11.5537	-313.237	0	0
11.5658	573	11.5658	547.96	11.5658	-311.847	0	0
11.578	532	11.578	503.04	11.578	-307.927	0	0
11.5902	493	11.5902	457.12	11.5902	-301.007	0	0
11.6024	454	11.6024	412.43	11.6024	-295.317	0	0
11.6146	411	11.6146	370.68	11.6146	-296.567	0	0
11.6268	374	11.6268	333.08	11.6268	-295.967	0	0
11.639	337	11.639	300.28	11.639	-300.167	0	0
11.6511	303	11.6511	272.46	11.6511	-306.347	0	0
11.6633	274	11.6633	249.36	11.6633	-312.247	0	0
11.6755	248	11.6755	230.46	11.6755	-319.347	0	0
11.6877	228	11.6877	215.07	11.6877	-323.957	0	0
11.6999	211	11.6999	202.43	11.6999	-328.317	0	0
11.7121	196	11.7121	191.8	11.7121	-332.687	0	0
11.7243	183	11.7243	182.54	11.7243	-336.427	0	0
11.7364	172	11.7364	174.12	11.7364	-339.007	0	0
11.7486	167	11.7486	166.17	11.7486	-336.057	0	0
11.7608	158	11.7608	158.26	11.7608	-337.147	0	0
11.773	148	11.773	150.68	11.773	-339.567	0	0
11.7852	141	11.7852	143.17	11.7852	-339.057	0	0
11.7974	132	11.7974	138.27	11.7974	-343.157	0	0
11.8096	127	11.8096	135.26	11.8096	-345.147	0	0
11.8217	124	11.8217	132.41	11.8217	-345.297	0	0
11.8339	122	11.8339	129.76	11.8339	-344.647	0	0
11.8461	122	11.8461	127.35	11.8461	-342.237	0	0
11.8583	123	11.8583	125.18	11.8583	-339.067	0	0
11.8705	121	11.8705	123.27	11.8705	-339.157	0	0
11.8827	118	11.8827	121.62	11.8827	-340.507	0	0
11.8949	112	11.8949	120.22	11.8949	-345.107	0	0
11.9071	112	11.9071	119.67	11.9071	-344.557	0	0
11.9192	110	11.9192	118.86	11.9192	-345.747	0	0
11.9314	111	11.9314	118.66	11.9314	-344.547	0	0
11.9436	117	11.9436	120.12	11.9436	-340.007	0	0
11.9558	119	11.9558	122.27	11.9558	-340.157	0	0
11.968	131	11.968	125.36	11.968	-331.247	0	0
11.9802	138	11.9802	129.76	11.9802	-328.647	0	0
11.9924	148	11.9924	135.94	11.9924	-324.827	0	0
12.0045	164	12.0045	144.45	12.0045	-317.337	0	0
12.0167	179	12.0167	155.91	12.0167	-313.797	0	0
12.0289	197	12.0289	170.97	12.0289	-310.857	0	0
12.0411	217	12.0411	190.22	12.0411	-310.107	0	0
12.0533	238	12.0533	214.08	12.0533	-312.967	0	0
12.0655	269	12.0655	242.72	12.0655	-310.607	0	0
12.0777	295	12.0777	275.93	12.0777	-317.817	0	0
12.0898	322	12.0898	313.02	12.0898	-327.907	0	0
12.102	352	12.102	352.82	12.102	-337.707	0	0
12.1142	376	12.1142	393.59	12.1142	-354.477	0	0
12.1264	402	12.1264	433.18	12.1264	-368.067	0	0
12.1386	419	12.1386	469.11	12.1386	-386.997	0	0
12.1508	429	12.1508	498.79	12.1508	-406.677	0	0
12.163	440	12.163	519.81	12.163	-416.697	0	0
12.1751	440	12.1751	530.34	12.1751	-427.227	0	0
12.1873	446	12.1873	529.46	12.1873	-420.347	0	0
12.1995	443	12.1995	517.43	12.1995	-411.317	0	0
12.2117	439	12.2117	495.68	12.2117	-393.567	0	0
12.2239	435	12.2239	466.47	12.2239	-368.357	0	0
12.2361	428	12.2361	432.56	12.2361	-341.447	0	0
12.2483	420	12.2483	396.84	12.2483	-313.727	0	0
12.2604	412	12.2604	362.09	12.2604	-286.977	0	0
12.2726	399	12.2726	330.76	12.2726	-268.647	0	0
12.2848	393	12.2848	304.87	12.2848	-248.757	0	0
12.297	382	12.297	285.86	12.297	-240.747	0	0
12.3092	372	12.3092	274.59	12.3092	-239.477	0	0
12.3214	367	12.3214	271.31	12.3214	-241.197	0	0
12.3336	363	12.3336	275.72	12.3336	-249.607	0	0
12.3457	370	12.3457	286.95	12.3457	-253.837	0	0
12.3579	378	12.3579	303.39	12.3579	-262.277	0	0
12.3701	384	12.3701	323.97	12.3701	-276.857	0	0
12.3823	391	12.3823	346.42	12.3823	-292.307	0	0
12.3945	394	12.3945	368.64	12.3945	-311.527	0	0
12.4067	397	12.4067	388.53	12.4067	-328.417	0	0
12.4189	398	12.4189	404.18	12.4189	-343.067	0	0
12.431	390	12.431	414.08	12.431	-360.967	0	0
12.4432	386	12.4432	417.36	12.4432	-368.247	0	0
12.4554	370	12.4554	414	12.4554	-380.887	0	0
12.4676	350	12.4676	404.7	12.4676	-391.587	0	0
12.4798	334	12.4798	390.8	12.4798	-393.687	0	0
12.492	315	12.492	373.87	12.492	-395.757	0	0
12.5042	298	12.5042	355.52	12.5042	-394.407	0	0
12.5164	280	12.5164	337.15	12.5164	-394.037	0	0
12.5285	265	12.5285	319.82	12.5285	-391.707	0	0
12.5407	255	12.5407	304.21	12.5407	-386.097	0	0
12.5529	248	12.5529	290.53	12.5529	-379.417	0	0
12.5651	242	12.5651	278.64	12.5651	-373.527	0	0
12.5773	241	12.5773	268.11	12.5773	-363.997	0	0
12.5895	239	12.5895	258.4	12.5895	-356.287	0	0
12.6017	241	12.6017	248.96	12.6017	-344.847	0	0
12.6138	245	12.6138	239.39	12.6138	-331.277	0	0
12.626	245	12.626	229.51	12.626	-321.397	0	0
12.6382	245	12.6382	219.35	12.6382	-311.237	0	0
12.6504	236	12.6504	209.09	12.6504	-309.977	0	0
12.6626	226	12.6626	198.97	12.6626	-309.857	0	0
12.6748	218	12.6748	189.31	12.6748	-308.197	0	0
12.687	203	12.687	180.36	12.687	-314.247	0	0
12.6991	197	12.6991	172.37	12.6991	-312.257	0	0
12.7113	187	12.7113	165.47	12.7113	-315.357	0	0
12.7235	175	12.7235	159.74	12.7235	-321.627	0	0
12.7357	164	12.7357	154.94	12.7357	-327.827	0	0
12.7479	151	12.7479	151.45	12.7479	-337.337	0	0
12.7601	142	12.7601	148.93	12.7601	-343.817	0	0
12.7723	137	12.7723	147.24	12.7723	-347.127	0	0
12.7844	133	12.7844	146.24	12.7844	-350.127	0	0
12.7966	131	12.7966	145.82	12.7966	-351.707	0	0
12.8088	131	12.8088	146.19	12.8088	-352.077	0	0
12.821	129	12.821	147.35	12.821	-355.237	0	0
12.8332	135	12.8332	148.95	12.8332	-350.837	0	0
12.8454	138	12.8454	151.04	12.8454	-349.927	0	0
12.8576	150	12.8576	153.8	12.8576	-340.687	0	0
12.8697	156	12.8697	157.51	12.8697	-338.397	0	0
12.8819	165	12.8819	162.6	12.8819	-334.487	0	0
12.8941	173	12.8941	169.7	12.8941	-333.587	0	0
12.9063	183	12.9063	179.71	12.9063	-333.597	0	0
12.9185	204	12.9185	193.74	12.9185	-326.627	0	0
12.9307	222	12.9307	213.23	12.9307	-328.117	0	0
12.9429	245	12.9429	239.81	12.9429	-331.697	0	0
12.955	275	12.955	275.26	12.955	-337.147	0	0
12.9672	308	12.9672	321.35	12.9672	-350.237	0	0
12.9794	366	12.9794	379.52	12.9794	-350.407	0	0
12.9916	432	12.9916	450.7	12.9916	-355.587	0	0
13.0038	524	13.0038	534.89	13.0038	-347.777	0	0
13.016	628	13.016	630.94	13.016	-339.827	0	0
13.0282	749	13.0282	736.3	13.0282	-324.187	0	0
13.0403	886	13.0403	846.94	13.0403	-297.827	0	0
13.0525	1032	13.0525	957.46	13.0525	-262.347	0	0
13.0647	1169	13.0647	1061.35	13.0647	-229.237	0	0
13.0769	1285	13.0769	1151.47	13.0769	-203.357	0	0
13.0891	1371	13.0891	1220.73	13.0891	-186.617	0	0
13.1013	1408	13.1013	1263.03	13.1013	-191.917	0	0
13.1135	1399	13.1135	1274.34	13.1135	-212.227	0	0
13.1256	1339	13.1256	1253.6	13.1256	-251.487	0	0
13.1378	1234	13.1378	1203.01	13.1378	-305.897	0	0
13.15	1103	13.15	1127.45	13.15	-361.337	0	0
13.1622	962	13.1622	1033.52	13.1622	-408.407	0	0
13.1744	834	13.1744	928.4	13.1744	-431.287	0	0
13.1866	717	13.1866	819.08	13.1866	-438.967	0	0
13.1988	613	13.1988	711.72	13.1988	-435.607	0	0
13.211	524	13.211	611.25	13.211	-424.137	0	0
13.2231	451	13.2231	521.17	13.2231	-407.057	0	0
13.2353	389	13.2353	443.52	13.2353	-391.407	0	0
13.2475	338	13.2475	379.02	13.2475	-377.907	0	0
13.2597	300	13.2597	327.3	13.2597	-364.187	0	0
13.2719	269	13.2719	287.21	13.2719	-355.097	0	0
13.2841	242	13.2841	257.16	13.2841	-352.047	0	0
13.2963	218	13.2963	235.37	13.2963	-354.257	0	0
13.3084	195	13.3084	220.09	13.3084	-361.977	0	0
13.3206	183	13.3206	206.57	13.3206	-360.457	0	0
13.3328	171	13.3328	190.43	13.3328	-356.317	0	0
13.345	163	13.345	176.85	13.345	-350.737	0	0
13.3572	161	13.3572	165.03	13.3572	-340.917	0	0
13.3694	158	13.3694	154.37	13.3694	-333.257	0	0
13.3816	156	13.3816	144.45	13.3816	-325.337	0	0
13.3937	149	13.3937	134.78	13.3937	-322.667	0	0
13.4059	139	13.4059	125.58	13.4059	-323.467	0	0
13.4181	132	13.4181	116.52	13.4181	-321.407	0	0
13.4303	121	13.4303	107.5	13.4303	-323.387	0	0
13.4425	110	13.4425	103.23	13.4425	-330.117	0	0
13.4547	102	13.4547	101.82	13.4547	-336.707	0	0
13.4669	92	13.4669	100.39	13.4669	-345.277	0	0
13.479	91	13.479	98.94	13.479	-344.827	0	0
13.4912	89	13.4912	97.53	13.4912	-345.417	0	0
13.5034	92	13.5034	96.09	13.5034	-340.977	0	0
13.5156	94	13.5156	94.68	13.5156	-337.567	0	0
13.5278	92	13.5278	93.31	13.5278	-338.197	0	0
13.54	92	13.54	92	13.54	-336.887	0	0
13.5522	88	13.5522	90.74	13.5522	-339.627	0	0
13.5643	81	13.5643	89.53	13.5643	-345.417	0	0
13.5765	76	13.5765	88.38	13.5765	-349.267	0	0
13.5887	71	13.5887	87.28	13.5887	-353.167	0	0
13.6009	76	13.6009	86.22	13.6009	-347.107	0	0
13.6131	78	13.6131	85.2	13.6131	-344.087	0	0
13.6253	78	13.6253	84.22	13.6253	-343.107	0	0
13.6375	77	13.6375	83.25	13.6375	-343.137	0	0
13.6496	75	13.6496	82.17	13.6496	-344.057	0	0
13.6618	78	13.6618	81.24	13.6618	-340.127	0	0
13.674	79	13.674	80.33	13.674	-338.217	0	0
13.6862	80	13.6862	79.44	13.6862	-336.327	0	0
13.6984	82	13.6984	78.54	13.6984	-333.427	0	0
13.7106	80	13.7106	77.66	13.7106	-334.547	0	0
13.7228	81	13.7228	76.79	13.7228	-332.677	0	0
13.735	82	13.735	75.91	13.735	-330.797	0	0
13.7471	81	13.7471	75.05	13.7471	-330.937	0	0
13.7593	77	13.7593	74.19	13.7593	-334.077	0	0
13.7715	74	13.7715	73.78	13.7715	-336.667	0	0
13.7837	72	13.7837	73.61	13.7837	-338.497	0	0
13.7959	73	13.7959	73.45	13.7959	-337.337	0	0
13.8081	70	13.8081	73.24	13.8081	-340.127	0	0
13.8203	68	13.8203	73.08	13.8203	-341.967	0	0
13.8324	67	13.8324	72.93	13.8324	-342.817	0	0
13.8446	63	13.8446	72.78	13.8446	-346.667	0	0
13.8568	65	13.8568	72.63	13.8568	-344.517	0	0
13.869	62	13.869	72.48	13.869	-347.367	0	0
13.8812	65	13.8812	72.34	13.8812	-344.227	0	0
13.8934	70	13.8934	72.2	13.8934	-339.087	0	0
13.9056	71	13.9056	72.06	13.9056	-337.947	0	0
13.9177	73	13.9177	71.92	13.9177	-335.807	0	0
13.9299	69	13.9299	71.78	13.9299	-339.667	0	0
13.9421	70	13.9421	71.65	13.9421	-338.537	0	0
13.9543	70	13.9543	71.52	13.9543	-338.407	0	0
13.9665	70	13.9665	71.38	13.9665	-338.267	0	0
13.9787	71	13.9787	71.25	13.9787	-337.137	0	0
13.9909	71	13.9909	71.13	13.9909	-337.017	0	0
14.003	74	14.003	71	14.003	-333.887	0	0
14.0152	74	14.0152	70.88	14.0152	-333.767	0	0
14.0274	75	14.0274	70.75	14.0274	-332.637	0	0
14.0396	74	14.0396	70.63	14.0396	-333.517	0	0
14.0518	74	14.0518	70.51	14.0518	-333.397	0	0
14.064	73	14.064	70.39	14.064	-334.277	0	0
14.0762	72	14.0762	70.27	14.0762	-335.157	0	0
14.0883	69	14.0883	70.15	14.0883	-338.037	0	0
14.1005	66	14.1005	70.07	14.1005	-340.957	0	0
14.1127	69	14.1127	69.95	14.1127	-337.837	0	0
14.1249	67	14.1249	69.84	14.1249	-339.727	0	0
14.1371	68	14.1371	70.57	14.1371	-339.457	0	0
14.1493	68	14.1493	71.37	14.1493	-340.257	0	0
14.1615	72	14.1615	72.16	14.1615	-337.047	0	0
14.1736	77	14.1736	72.96	14.1736	-332.847	0	0
14.1858	84	14.1858	73.75	14.1858	-326.637	0	0
14.198	85	14.198	74.55	14.198	-326.437	0	0
14.2102	85	14.2102	75.35	14.2102	-327.237	0	0
14.2224	84	14.2224	76.15	14.2224	-329.037	0	0
14.2346	83	14.2346	76.95	14.2346	-330.837	0	0
14.2468	84	14.2468	77.76	14.2468	-330.647	0	0
14.2589	86	14.2589	78.56	14.2589	-329.447	0	0
14.2711	82	14.2711	79.37	14.2711	-334.257	0	0
14.2833	81	14.2833	80.18	14.2833	-336.067	0	0
14.2955	78	14.2955	80.99	14.2955	-339.877	0	0
14.3077	74	14.3077	81.81	14.3077	-344.697	0	0
14.3199	73	14.3199	82.05	14.3199	-345.937	0	0
14.3321	78	14.3321	82.89	14.3321	-341.777	0	0
14.3443	84	14.3443	83.72	14.3443	-336.607	0	0
14.3564	88	14.3564	84.52	14.3564	-333.407	0	0
14.3686	89	14.3686	84.41	14.3686	-332.297	0	0
14.3808	88	14.3808	84.31	14.3808	-333.197	0	0
14.393	89	14.393	84.22	14.393	-332.107	0	0
14.4052	88	14.4052	84.15	14.4052	-333.037	0	0
14.4174	89	14.4174	84.11	14.4174	-331.997	0	0
14.4296	86	14.4296	84.12	14.4296	-335.007	0	0
14.4417	85	14.4417	84.19	14.4417	-336.077	0	0
14.4539	87	14.4539	84.37	14.4539	-334.257	0	0
14.4661	94	14.4661	84.71	14.4661	-327.597	0	0
14.4783	99	14.4783	85.27	14.4783	-323.157	0	0
14.4905	103	14.4905	86.13	14.4905	-320.017	0	0
14.5027	103	14.5027	87.38	14.5027	-321.267	0	0
14.5149	104	14.5149	89.15	14.5149	-322.037	0	0
14.527	102	14.527	91.55	14.527	-326.437	0	0
14.5392	106	14.5392	94.68	14.5392	-325.567	0	0
14.5514	105	14.5514	98.63	14.5514	-330.517	0	0
14.5636	110	14.5636	103.42	14.5636	-330.307	0	0
14.5758	114	14.5758	109.01	14.5758	-331.897	0	0
14.588	118	14.588	115.27	14.588	-334.157	0	0
14.6002	122	14.6002	121.99	14.6002	-336.877	0	0
14.6123	123	14.6123	128.86	14.6123	-342.747	0	0
14.6245	124	14.6245	135.47	14.6245	-348.357	0	0
14.6367	121	14.6367	141.38	14.6367	-357.267	0	0
14.6489	122	14.6489	146.13	14.6489	-361.017	0	0
14.6611	121	14.6611	149.28	14.6611	-365.167	0	0
14.6733	124	14.6733	150.54	14.6733	-363.427	0	0
14.6855	124	14.6855	149.75	14.6855	-362.637	0	0
14.6976	124	14.6976	146.99	14.6976	-359.877	0	0
14.7098	126	14.7098	142.54	14.7098	-353.427	0	0
14.722	123	14.722	136.79	14.722	-350.677	0	0
14.7342	121	14.7342	130.23	14.7342	-346.117	0	0
14.7464	119	14.7464	123.33	14.7464	-341.217	0	0
14.7586	116	14.7586	116.55	14.7586	-337.437	0	0
14.7708	114	14.7708	110.26	14.7708	-333.147	0	0
14.7829	115	14.7829	104.77	14.7829	-326.657	0	0
14.7951	114	14.7951	100.3	14.7951	-323.187	0	0
14.8073	115	14.8073	96.98	14.8073	-318.867	0	0
14.8195	111	14.8195	94.86	14.8195	-320.747	0	0
14.8317	113	14.8317	93.94	14.8317	-317.827	0	0
14.8439	117	14.8439	94.15	14.8439	-314.037	0	0
14.8561	120	14.8561	95.4	14.8561	-312.287	0	0
14.8682	123	14.8682	97.51	14.8682	-311.397	0	0
14.8804	123	14.8804	100.31	14.8804	-314.197	0	0
14.8926	121	14.8926	103.55	14.8926	-319.437	0	0
14.9048	120	14.9048	106.98	14.9048	-323.867	0	0
14.917	117	14.917	110.3	14.917	-330.187	0	0
14.9292	119	14.9292	113.21	14.9292	-331.097	0	0
14.9414	117	14.9414	115.42	14.9414	-335.307	0	0
14.9535	115	14.9535	116.7	14.9535	-338.587	0	0
14.9657	110	14.9657	116.89	14.9657	-343.777	0	0
14.9779	109	14.9779	115.93	14.9779	-343.817	0	0
14.9901	107	14.9901	113.91	14.9901	-343.797	0	0
15.0023	104	15.0023	111.01	15.0023	-343.897	0	0
15.0145	97	15.0145	107.47	15.0145	-347.357	0	0
15.0267	90	15.0267	103.58	15.0267	-350.467	0	0
15.0389	83	15.0389	99.59	15.0389	-353.477	0	0
15.051	77	15.051	95.75	15.051	-355.637	0	0
15.0632	73	15.0632	92.28	15.0632	-356.167	0	0
15.0754	72	15.0754	89.34	15.0754	-354.227	0	0
15.0876	73	15.0876	86.53	15.0876	-350.417	0	0
15.0998	71	15.0998	84.2	15.0998	-350.087	0	0
15.112	71	15.112	82.7	15.112	-348.587	0	0
15.1242	75	15.1242	82.08	15.1242	-343.967	0	0
15.1363	82	15.1363	82.38	15.1363	-337.267	0	0
15.1485	84	15.1485	83.61	15.1485	-336.497	0	0
15.1607	91	15.1607	85.77	15.1607	-331.657	0	0
15.1729	100	15.1729	88.81	15.1729	-325.697	0	0
15.1851	112	15.1851	92.63	15.1851	-317.517	0	0
15.1973	116	15.1973	97.05	15.1973	-317.937	0	0
15.2095	120	15.2095	101.85	15.2095	-318.737	0	0
15.2216	122	15.2216	106.69	15.2216	-321.577	0	0
15.2338	124	15.2338	111.23	15.2338	-324.117	0	0
15.246	124	15.246	115.06	15.246	-327.947	0	0
15.2582	121	15.2582	117.78	15.2582	-333.667	0	0
15.2704	122	15.2704	119.05	15.2704	-333.937	0	0
15.2826	117	15.2826	118.65	15.2826	-338.537	0	0
15.2948	113	15.2948	116.52	15.2948	-340.407	0	0
15.3069	105	15.3069	112.77	15.3069	-344.657	0	0
15.3191	100	15.3191	107.68	15.3191	-344.567	0	0
15.3313	95	15.3313	101.6	15.3313	-343.487	0	0
15.3435	83	15.3435	94.93	15.3435	-348.817	0	0
15.3557	76	15.3557	88.05	15.3557	-348.937	0	0
15.3679	68	15.3679	81.3	15.3679	-350.187	0	0
15.3801	64	15.3801	74.95	15.3801	-347.837	0	0
15.3922	60	15.3922	68.47	15.3922	-345.357	0	0
15.4044	53	15.4044	60.88	15.4044	-344.767	0	0
15.4166	51	15.4166	54.01	15.4166	-339.897	0	0
15.4288	46	15.4288	47.87	15.4288	-338.757	0	0
15.441	46	15.441	42.38	15.441	-333.267	0	0
15.4532	39	15.4532	37.49	15.4532	-335.377	0	0
15.4654	33	15.4654	33.11	15.4654	-336.997	0	0
15.4775	31	15.4775	29.19	15.4775	-335.077	0	0
15.4897	25	15.4897	25.67	15.4897	-337.557	0	0
15.5019	21	15.5019	22.52	15.5019	-338.407	0	0
15.5141	15	15.5141	19.74	15.5141	-341.627	0	0
15.5263	16	15.5263	17.31	15.5263	-338.197	0	0
15.5385	18	15.5385	17.68	15.5385	-336.567	0	0
15.5507	17	15.5507	18.53	15.5507	-338.417	0	0
15.5629	18	15.5629	19.67	15.5629	-338.557	0	0
15.575	17	15.575	21.05	15.575	-340.937	0	0
15.5872	19	15.5872	22.55	15.5872	-340.437	0	0
15.5994	22	15.5994	24.07	15.5994	-338.957	0	0
15.6116	22	15.6116	25.45	15.6116	-340.337	0	0
15.6238	24	15.6238	26.53	15.6238	-339.417	0	0
15.636	25	15.636	27.15	15.636	-339.037	0	0
15.6482	28	15.6482	27.17	15.6482	-336.057	0	0
15.6603	27	15.6603	26.5	15.6603	-336.387	0	0
15.6725	25	15.6725	25.11	15.6725	-336.997	0	0
15.6847	23	15.6847	23.07	15.6847	-336.957	0	0
15.6969	21	15.6969	20.47	15.6969	-336.357	0	0
15.7091	19	15.7091	17.48	15.7091	-335.367	0	0
15.7213	21	15.7213	14.25	15.7213	-330.137	0	0
15.7335	16	15.7335	10.94	15.7335	-331.827	0	0
15.7456	11	15.7456	7.69	15.7456	-333.577	0	0
15.7578	6	15.7578	4.6	15.7578	-335.487	0	0
15.77	1	15.77	1.76	15.77	-337.647	0	0
15.7822	1	15.7822	-0.81	15.7822	-335.077	0	0
15.7944	1	15.7944	-1.61	15.7944	-334.277	0	0
15.8066	1	15.8066	-1.93	15.8066	-333.957	0	0
15.8188	1	15.8188	-2.01	15.8188	-333.877	0	0
15.8309	1	15.8309	-1.86	15.8309	-334.027	0	0
15.8431	1	15.8431	-1.54	15.8431	-334.347	0	0
15.8553	1	15.8553	-1.08	15.8553	-334.807	0	0
15.8675	1	15.8675	-0.52	15.8675	-335.367	0	0
15.8797	1	15.8797	0.07	15.8797	-335.957	0	0
15.8919	1	15.8919	0.76	15.8919	-336.647	0	0
15.9041	1	15.9041	1.48	15.9041	-337.367	0	0
15.9162	1	15.9162	2.23	15.9162	-338.117	0	0
15.9284	1	15.9284	2.99	15.9284	-338.877	0	0
15.9406	1	15.9406	3.76	15.9406	-339.647	0	0
15.9528	1	15.9528	4.54	15.9528	-340.427	0	0
15.965	1	15.965	5.32	15.965	-341.207	0	0
15.9772	1	15.9772	5.3	15.9772	-341.187	0	0

## Sheet: Supplementary Figure 7b
Supplementary Figure 7b
zeta-N2 86 GPa
powder data provided by Gregoryanz from his 2007 paper
2theta	Observed Intensity	2theta	Calculated Intensity	2theta	Difference between observed and calculated intensity	2theta position of tick marks
8.9941	67	8.9941	50.05	8.9941	-278.724	9.9818	-67.8445
9.0063	68	9.0063	50.06	9.0063	-277.734	10.0246	-67.8445
9.0186	68	9.0186	50.06	9.0186	-277.734	10.6197	-67.8445
9.0308	64	9.0308	50.06	9.0308	-281.734	10.775	-67.8445
9.043	63	9.043	50.07	9.043	-282.744	10.8048	-67.8445
9.0553	59	9.0553	50.07	9.0553	-286.744	11.1656	-67.8445
9.0675	52	9.0675	50.08	9.0675	-293.754	11.2302	-67.8445
9.0798	51	9.0798	50.97	9.0798	-295.644	11.5577	-67.8445
9.092	47	9.092	49.05	9.092	-297.724	11.5855	-67.8445
9.1042	52	9.1042	47.13	9.1042	-290.804	11.7738	-67.8445
9.1165	54	9.1165	45.21	9.1165	-286.884	12.2844	-67.8445
9.1287	56	9.1287	43.29	9.1287	-282.964	12.5117	-67.8445
9.1409	55	9.1409	41.37	9.1409	-282.044	12.6207	-67.8445
9.1532	49	9.1532	39.45	9.1532	-286.124	12.6929	-67.8445
9.1654	48	9.1654	37.54	9.1654	-285.214	12.963	-67.8445
9.1776	48	9.1776	35.62	9.1776	-283.294	13.2505	-67.8445
9.1899	46	9.1899	33.7	9.1899	-283.374	13.5315	-67.8445
9.2021	48	9.2021	31.78	9.2021	-279.454	13.6627	-67.8445
9.2143	43	9.2143	29.86	9.2143	-282.534	14.7714	-67.8445
9.2266	38	9.2266	27.95	9.2266	-285.624	15.0611	-67.8445
9.2388	33	9.2388	26.03	9.2388	-288.704	15.0819	-67.8445
9.2511	31	9.2511	24.11	9.2511	-288.784	15.1716	-67.8445
9.2633	30	9.2633	22.2	9.2633	-287.874	15.2547	-67.8445
9.2755	28	9.2755	20.28	9.2755	-287.954	15.3971	-67.8445
9.2878	26	9.2878	18.37	9.2878	-288.044	15.4531	-67.8445
9.3	21	9.3	16.45	9.3	-291.124	15.4707	-67.8445
9.3122	20	9.3122	14.54	9.3122	-290.214	15.5007	-67.8445
9.3245	14	9.3245	12.63	9.3245	-294.304	15.5213	-67.8445
9.3367	14	9.3367	10.71	9.3367	-292.384	15.7404	-67.8445
9.3489	12	9.3489	8.88	9.3489	-292.554	0	0
9.3612	15	9.3612	6.97	9.3612	-287.644	0	0
9.3734	12	9.3734	5.06	9.3734	-288.734	0	0
9.3857	12	9.3857	3.44	9.3857	-287.114	0	0
9.3979	9	9.3979	3.27	9.3979	-289.944	0	0
9.4101	3	9.4101	3.11	9.4101	-295.784	0	0
9.4224	3	9.4224	2.94	9.4224	-295.614	0	0
9.4346	1	9.4346	2.78	9.4346	-297.454	0	0
9.4468	1	9.4468	2.62	9.4468	-297.294	0	0
9.4591	2	9.4591	2.45	9.4591	-296.124	0	0
9.4713	4	9.4713	2.29	9.4713	-293.964	0	0
9.4835	7	9.4835	2.14	9.4835	-290.814	0	0
9.4958	9	9.4958	1.98	9.4958	-288.654	0	0
9.508	6	9.508	1.85	9.508	-291.524	0	0
9.5202	12	9.5202	1.7	9.5202	-285.374	0	0
9.5325	10	9.5325	1.55	9.5325	-287.224	0	0
9.5447	12	9.5447	1.4	9.5447	-285.074	0	0
9.557	15	9.557	1.26	9.557	-281.934	0	0
9.5692	13	9.5692	1.12	9.5692	-283.794	0	0
9.5814	12	9.5814	0.98	9.5814	-284.654	0	0
9.5937	12	9.5937	0.84	9.5937	-284.514	0	0
9.6059	9	9.6059	0.71	9.6059	-287.384	0	0
9.6181	6	9.6181	0.58	9.6181	-290.254	0	0
9.6304	1	9.6304	0.46	9.6304	-295.134	0	0
9.6426	1	9.6426	0.35	9.6426	-295.024	0	0
9.6548	1	9.6548	0.24	9.6548	-294.914	0	0
9.6671	1	9.6671	0.15	9.6671	-294.824	0	0
9.6793	1	9.6793	0.22	9.6793	-294.894	0	0
9.6916	1	9.6916	0.32	9.6916	-294.994	0	0
9.7038	1	9.7038	0.46	9.7038	-295.134	0	0
9.716	1	9.716	0.67	9.716	-295.344	0	0
9.7283	1	9.7283	1	9.7283	-295.674	0	0
9.7405	1	9.7405	1.52	9.7405	-296.194	0	0
9.7527	1	9.7527	2.33	9.7527	-297.004	0	0
9.765	4	9.765	3.62	9.765	-295.294	0	0
9.7772	10	9.7772	5.63	9.7772	-291.304	0	0
9.7894	13	9.7894	8.71	9.7894	-291.384	0	0
9.8017	15	9.8017	13.33	9.8017	-294.004	0	0
9.8139	14	9.8139	20.12	9.8139	-301.794	0	0
9.8261	17	9.8261	29.85	9.8261	-308.524	0	0
9.8384	22	9.8384	43.44	9.8384	-317.114	0	0
9.8506	30	9.8506	61.89	9.8506	-327.564	0	0
9.8629	49	9.8629	86.27	9.8629	-332.944	0	0
9.8751	75	9.8751	117.55	9.8751	-338.224	0	0
9.8873	111	9.8873	156.49	9.8873	-341.164	0	0
9.8996	158	9.8996	203.47	9.8996	-341.144	0	0
9.9118	218	9.9118	258.29	9.9118	-335.964	0	0
9.924	288	9.924	320.08	9.924	-327.754	0	0
9.9363	372	9.9363	387.15	9.9363	-310.824	0	0
9.9485	456	9.9485	457.01	9.9485	-296.684	0	0
9.9607	546	9.9607	526.57	9.9607	-276.244	0	0
9.973	631	9.973	591.86	9.973	-256.534	0	0
9.9852	702	9.9852	649.03	9.9852	-242.704	0	0
9.9975	751	9.9975	694.28	9.9975	-238.954	0	0
10.0097	779	10.0097	724.35	10.0097	-241.024	0	0
10.0219	773	10.0219	736.95	10.0219	-259.624	0	0
10.0342	744	10.0342	731.09	10.0342	-282.764	0	0
10.0464	699	10.0464	707.21	10.0464	-303.884	0	0
10.0586	635	10.0586	667.16	10.0586	-327.834	0	0
10.0709	562	10.0709	613.87	10.0709	-347.544	0	0
10.0831	492	10.0831	550.99	10.0831	-354.664	0	0
10.0953	424	10.0953	482.5	10.0953	-354.174	0	0
10.1076	357	10.1076	412.26	10.1076	-350.934	0	0
10.1198	297	10.1198	343.71	10.1198	-342.384	0	0
10.132	240	10.132	279.64	10.132	-335.314	0	0
10.1443	197	10.1443	222.03	10.1443	-320.704	0	0
10.1565	160	10.1565	172.06	10.1565	-307.734	0	0
10.1688	127	10.1688	130.15	10.1688	-298.824	0	0
10.181	98	10.181	96.12	10.181	-293.794	0	0
10.1932	75	10.1932	69.33	10.1932	-290.004	0	0
10.2055	57	10.2055	48.84	10.2055	-287.514	0	0
10.2177	42	10.2177	33.63	10.2177	-287.304	0	0
10.2299	35	10.2299	22.64	10.2299	-283.314	0	0
10.2422	27	10.2422	14.91	10.2422	-283.584	0	0
10.2544	19	10.2544	9.62	10.2544	-286.294	0	0
10.2666	11	10.2666	6.08	10.2666	-290.754	0	0
10.2789	2	10.2789	3.78	10.2789	-297.454	0	0
10.2911	1	10.2911	2.33	10.2911	-297.004	0	0
10.3034	1	10.3034	1.46	10.3034	-296.134	0	0
10.3156	1	10.3156	1.08	10.3156	-295.754	0	0
10.3278	1	10.3278	0.93	10.3278	-295.604	0	0
10.3401	1	10.3401	1.07	10.3401	-295.744	0	0
10.3523	1	10.3523	1.53	10.3523	-296.204	0	0
10.3645	1	10.3645	2.42	10.3645	-297.094	0	0
10.3768	1	10.3768	3.94	10.3768	-298.614	0	0
10.389	4	10.389	6.33	10.389	-298.004	0	0
10.4012	9	10.4012	9.95	10.4012	-296.624	0	0
10.4135	17	10.4135	15.28	10.4135	-293.954	0	0
10.4257	24	10.4257	22.9	10.4257	-294.574	0	0
10.4379	36	10.4379	33.49	10.4379	-293.164	0	0
10.4502	54	10.4502	47.82	10.4502	-289.494	0	0
10.4624	75	10.4624	66.63	10.4624	-287.304	0	0
10.4747	104	10.4747	90.61	10.4747	-282.284	0	0
10.4869	136	10.4869	120.26	10.4869	-279.934	0	0
10.4991	173	10.4991	155.78	10.4991	-278.454	0	0
10.5114	214	10.5114	196.92	10.5114	-278.594	0	0
10.5236	259	10.5236	242.94	10.5236	-279.614	0	0
10.5358	307	10.5358	292.53	10.5358	-281.204	0	0
10.5481	356	10.5481	343.83	10.5481	-283.504	0	0
10.5603	399	10.5603	394.53	10.5603	-291.204	0	0
10.5725	439	10.5725	442.04	10.5725	-298.714	0	0
10.5848	469	10.5848	483.75	10.5848	-310.424	0	0
10.597	489	10.597	517.24	10.597	-323.914	0	0
10.6093	499	10.6093	540.65	10.6093	-337.324	0	0
10.6215	501	10.6215	552.87	10.6215	-347.544	0	0
10.6337	497	10.6337	553.76	10.6337	-352.434	0	0
10.646	492	10.646	544.14	10.646	-347.814	0	0
10.6582	482	10.6582	525.64	10.6582	-339.314	0	0
10.6704	474	10.6704	500.44	10.6704	-322.114	0	0
10.6827	466	10.6827	470.92	10.6827	-300.594	0	0
10.6949	456	10.6949	439.36	10.6949	-279.034	0	0
10.7071	444	10.7071	407.68	10.7071	-259.354	0	0
10.7194	427	10.7194	377.27	10.7194	-245.944	0	0
10.7316	402	10.7316	348.91	10.7316	-242.584	0	0
10.7438	377	10.7438	322.76	10.7438	-241.434	0	0
10.7561	350	10.7561	298.56	10.7561	-244.234	0	0
10.7683	324	10.7683	275.71	10.7683	-247.384	0	0
10.7806	291	10.7806	253.56	10.7806	-258.234	0	0
10.7928	255	10.7928	231.54	10.7928	-272.214	0	0
10.805	220	10.805	209.31	10.805	-284.984	0	0
10.8173	188	10.8173	186.78	10.8173	-294.454	0	0
10.8295	158	10.8295	164.14	10.8295	-301.814	0	0
10.8417	130	10.8417	141.76	10.8417	-307.434	0	0
10.854	100	10.854	120.14	10.854	-315.814	0	0
10.8662	79	10.8662	99.77	10.8662	-316.444	0	0
10.8784	58	10.8784	81.14	10.8784	-318.814	0	0
10.8907	45	10.8907	64.58	10.8907	-315.254	0	0
10.9029	33	10.9029	50.33	10.9029	-313.004	0	0
10.9152	19	10.9152	38.44	10.9152	-315.114	0	0
10.9274	8	10.9274	28.88	10.9274	-316.554	0	0
10.9396	1	10.9396	21.51	10.9396	-316.184	0	0
10.9519	1	10.9519	16.16	10.9519	-310.834	0	0
10.9641	1	10.9641	12.67	10.9641	-307.344	0	0
10.9763	1	10.9763	10.99	10.9763	-305.664	0	0
10.9886	1	10.9886	11.11	10.9886	-305.784	0	0
11.0008	6	11.0008	13.2	11.0008	-302.874	0	0
11.013	15	11.013	17.66	11.013	-298.334	0	0
11.0253	26	11.0253	24.95	11.0253	-294.624	0	0
11.0375	35	11.0375	35.86	11.0375	-296.534	0	0
11.0497	56	11.0497	51.3	11.0497	-290.974	0	0
11.062	79	11.062	72.31	11.062	-288.984	0	0
11.0742	112	11.0742	99.94	11.0742	-283.614	0	0
11.0865	153	11.0865	135.11	11.0865	-277.784	0	0
11.0987	188	11.0987	178.46	11.0987	-286.134	0	0
11.1109	232	11.1109	230.17	11.1109	-293.844	0	0
11.1232	282	11.1232	289.79	11.1232	-303.464	0	0
11.1354	341	11.1354	356.05	11.1354	-310.724	0	0
11.1476	406	11.1476	426.86	11.1476	-316.534	0	0
11.1599	474	11.1599	499.31	11.1599	-320.984	0	0
11.1721	536	11.1721	569.79	11.1721	-329.464	0	0
11.1843	598	11.1843	634.26	11.1843	-331.934	0	0
11.1966	641	11.1966	688.62	11.1966	-343.294	0	0
11.2088	679	11.2088	729.09	11.2088	-345.764	0	0
11.2211	696	11.2211	752.65	11.2211	-352.324	0	0
11.2333	700	11.2333	757.49	11.2333	-353.164	0	0
11.2455	686	11.2455	743.25	11.2455	-352.924	0	0
11.2578	667	11.2578	711.03	11.2578	-339.704	0	0
11.27	636	11.27	663.34	11.27	-323.014	0	0
11.2822	595	11.2822	603.65	11.2822	-304.324	0	0
11.2945	546	11.2945	536	11.2945	-285.674	0	0
11.3067	498	11.3067	464.5	11.3067	-262.174	0	0
11.3189	443	11.3189	393.29	11.3189	-245.964	0	0
11.3312	387	11.3312	325.72	11.3312	-234.394	0	0
11.3434	329	11.3434	264.53	11.3434	-231.204	0	0
11.3556	276	11.3556	211.71	11.3556	-231.384	0	0
11.3679	232	11.3679	168.51	11.3679	-232.184	0	0
11.3801	193	11.3801	135.62	11.3801	-238.294	0	0
11.3924	162	11.3924	113.26	11.3924	-246.934	0	0
11.4046	142	11.4046	101.41	11.4046	-255.084	0	0
11.4168	131	11.4168	99.89	11.4168	-264.564	0	0
11.4291	127	11.4291	108.5	11.4291	-277.174	0	0
11.4413	136	11.4413	126.91	11.4413	-286.584	0	0
11.4535	149	11.4535	154.76	11.4535	-301.434	0	0
11.4658	177	11.4658	191.42	11.4658	-310.094	0	0
11.478	214	11.478	235.94	11.478	-317.614	0	0
11.4902	257	11.4902	286.88	11.4902	-325.554	0	0
11.5025	312	11.5025	342.25	11.5025	-325.924	0	0
11.5147	366	11.5147	399.5	11.5147	-329.174	0	0
11.527	420	11.527	455.6	11.527	-331.274	0	0
11.5392	472	11.5392	507.25	11.5392	-330.924	0	0
11.5514	512	11.5514	551.11	11.5514	-334.784	0	0
11.5637	550	11.5637	584.12	11.5637	-329.794	0	0
11.5759	573	11.5759	603.84	11.5759	-326.514	0	0
11.5881	589	11.5881	608.81	11.5881	-315.484	0	0
11.6004	592	11.6004	598.71	11.6004	-302.384	0	0
11.6126	576	11.6126	574.45	11.6126	-294.124	0	0
11.6248	551	11.6248	538.02	11.6248	-282.694	0	0
11.6371	513	11.6371	492.19	11.6371	-274.864	0	0
11.6493	466	11.6493	440.18	11.6493	-269.854	0	0
11.6615	416	11.6615	385.28	11.6615	-264.954	0	0
11.6738	362	11.6738	330.55	11.6738	-264.224	0	0
11.686	312	11.686	278.55	11.686	-262.224	0	0
11.6983	261	11.6983	231.21	11.6983	-265.884	0	0
11.7105	216	11.7105	189.72	11.7105	-269.394	0	0
11.7227	176	11.7227	154.6	11.7227	-274.274	0	0
11.735	141	11.735	125.75	11.735	-280.424	0	0
11.7472	117	11.7472	102.66	11.7472	-281.334	0	0
11.7594	96	11.7594	84.5	11.7594	-284.174	0	0
11.7717	79	11.7717	70.33	11.7717	-287.004	0	0
11.7839	67	11.7839	59.23	11.7839	-287.904	0	0
11.7961	52	11.7961	50.37	11.7961	-294.044	0	0
11.8084	43	11.8084	43.1	11.8084	-295.774	0	0
11.8206	34	11.8206	36.92	11.8206	-298.594	0	0
11.8329	26	11.8329	31.51	11.8329	-301.184	0	0
11.8451	24	11.8451	26.67	11.8451	-298.344	0	0
11.8573	17	11.8573	22.33	11.8573	-301.004	0	0
11.8696	17	11.8696	18.44	11.8696	-297.114	0	0
11.8818	13	11.8818	15.01	11.8818	-297.684	0	0
11.894	7	11.894	11.96	11.894	-300.634	0	0
11.9063	1	11.9063	9.44	11.9063	-304.114	0	0
11.9185	1	11.9185	7.33	11.9185	-302.004	0	0
11.9307	1	11.9307	5.64	11.9307	-300.314	0	0
11.943	1	11.943	4.32	11.943	-298.994	0	0
11.9552	1	11.9552	3.33	11.9552	-298.004	0	0
11.9674	1	11.9674	2.63	11.9674	-297.304	0	0
11.9797	1	11.9797	2.34	11.9797	-297.014	0	0
11.9919	1	11.9919	2.13	11.9919	-296.804	0	0
12.0042	1	12.0042	2.14	12.0042	-296.814	0	0
12.0164	1	12.0164	2.43	12.0164	-297.104	0	0
12.0286	1	12.0286	3.07	12.0286	-297.744	0	0
12.0409	2	12.0409	4.19	12.0409	-297.864	0	0
12.0531	6	12.0531	5.96	12.0531	-295.634	0	0
12.0653	26	12.0653	8.72	12.0653	-278.394	0	0
12.0776	37	12.0776	12.82	12.0776	-271.494	0	0
12.0898	53	12.0898	18.69	12.0898	-261.364	0	0
12.102	73	12.102	26.9	12.102	-249.574	0	0
12.1143	90	12.1143	38.02	12.1143	-243.694	0	0
12.1265	112	12.1265	52.66	12.1265	-236.334	0	0
12.1388	133	12.1388	71.36	12.1388	-234.034	0	0
12.151	154	12.151	94.52	12.151	-236.194	0	0
12.1632	186	12.1632	122.29	12.1632	-231.964	0	0
12.1755	207	12.1755	154.48	12.1755	-243.154	0	0
12.1877	235	12.1877	190.48	12.1877	-251.154	0	0
12.1999	260	12.1999	229.21	12.1999	-264.884	0	0
12.2122	274	12.2122	269.14	12.2122	-290.814	0	0
12.2244	292	12.2244	308.35	12.2244	-312.024	0	0
12.2366	301	12.2366	344.67	12.2366	-339.344	0	0
12.2489	313	12.2489	375.86	12.2489	-358.534	0	0
12.2611	320	12.2611	399.85	12.2611	-375.524	0	0
12.2733	321	12.2733	414.96	12.2733	-389.634	0	0
12.2856	324	12.2856	420.2	12.2856	-391.874	0	0
12.2978	324	12.2978	415.36	12.2978	-387.034	0	0
12.3101	318	12.3101	401.13	12.3101	-378.804	0	0
12.3223	309	12.3223	379	12.3223	-365.674	0	0
12.3345	295	12.3345	351.04	12.3345	-351.714	0	0
12.3468	288	12.3468	319.7	12.3468	-327.374	0	0
12.359	281	12.359	287.53	12.359	-302.204	0	0
12.3712	275	12.3712	256.91	12.3712	-277.584	0	0
12.3835	270	12.3835	229.83	12.3835	-255.504	0	0
12.3957	257	12.3957	207.78	12.3957	-246.454	0	0
12.4079	247	12.4079	191.59	12.4079	-240.264	0	0
12.4202	239	12.4202	181.43	12.4202	-238.104	0	0
12.4324	232	12.4324	176.89	12.4324	-240.564	0	0
12.4447	228	12.4447	177.01	12.4447	-244.684	0	0
12.4569	221	12.4569	180.51	12.4569	-255.184	0	0
12.4691	217	12.4691	185.87	12.4691	-264.544	0	0
12.4814	210	12.4814	191.59	12.4814	-277.264	0	0
12.4936	204	12.4936	196.3	12.4936	-287.974	0	0
12.5058	196	12.5058	198.84	12.5058	-298.514	0	0
12.5181	186	12.5181	198.76	12.5181	-308.434	0	0
12.5303	177	12.5303	195.76	12.5303	-314.434	0	0
12.5425	163	12.5425	190.11	12.5425	-322.784	0	0
12.5548	155	12.5548	182.39	12.5548	-323.064	0	0
12.567	140	12.567	173.43	12.567	-329.104	0	0
12.5792	129	12.5792	164.13	12.5792	-330.804	0	0
12.5915	122	12.5915	155.3	12.5915	-328.974	0	0
12.6037	117	12.6037	147.59	12.6037	-326.264	0	0
12.616	115	12.616	141.37	12.616	-322.044	0	0
12.6282	113	12.6282	136.71	12.6282	-319.384	0	0
12.6404	111	12.6404	133.39	12.6404	-318.064	0	0
12.6527	109	12.6527	130.97	12.6527	-317.644	0	0
12.6649	110	12.6649	128.86	12.6649	-314.534	0	0
12.6771	111	12.6771	126.39	12.6771	-311.064	0	0
12.6894	109	12.6894	122.99	12.6894	-309.664	0	0
12.7016	111	12.7016	118.22	12.7016	-302.894	0	0
12.7138	107	12.7138	111.85	12.7138	-300.524	0	0
12.7261	105	12.7261	103.9	12.7261	-294.574	0	0
12.7383	98	12.7383	94.58	12.7383	-292.254	0	0
12.7506	90	12.7506	84.25	12.7506	-289.924	0	0
12.7628	83	12.7628	73.37	12.7628	-286.044	0	0
12.775	70	12.775	62.42	12.775	-288.094	0	0
12.7873	62	12.7873	51.85	12.7873	-285.524	0	0
12.7995	52	12.7995	42.04	12.7995	-285.714	0	0
12.8117	44	12.8117	33.26	12.8117	-284.934	0	0
12.824	41	12.824	25.67	12.824	-280.344	0	0
12.8362	37	12.8362	19.33	12.8362	-278.004	0	0
12.8484	33	12.8484	14.21	12.8484	-276.884	0	0
12.8607	30	12.8607	10.12	12.8607	-275.794	0	0
12.8729	28	12.8729	7.1	12.8729	-274.774	0	0
12.8851	20	12.8851	4.9	12.8851	-280.574	0	0
12.8974	9	12.8974	3.36	12.8974	-290.034	0	0
12.9096	3	12.9096	2.35	12.9096	-295.024	0	0
12.9219	1	12.9219	1.75	12.9219	-296.424	0	0
12.9341	1	12.9341	1.49	12.9341	-296.164	0	0
12.9463	1	12.9463	1.52	12.9463	-296.194	0	0
12.9586	1	12.9586	2.1	12.9586	-296.774	0	0
12.9708	1	12.9708	3.09	12.9708	-297.764	0	0
12.983	1	12.983	4.65	12.983	-299.324	0	0
12.9953	1	12.9953	7.05	12.9953	-301.724	0	0
13.0075	1	13.0075	10.71	13.0075	-305.384	0	0
13.0197	1	13.0197	16.21	13.0197	-310.884	0	0
13.032	1	13.032	24.36	13.032	-319.034	0	0
13.0442	4	13.0442	36.2	13.0442	-327.874	0	0
13.0565	21	13.0565	53	13.0565	-327.674	0	0
13.0687	50	13.0687	76.27	13.0687	-321.944	0	0
13.0809	82	13.0809	107.63	13.0809	-321.304	0	0
13.0932	123	13.0932	148.71	13.0932	-321.384	0	0
13.1054	179	13.1054	201	13.1054	-317.674	0	0
13.1176	251	13.1176	265.52	13.1176	-310.194	0	0
13.1299	339	13.1299	342.66	13.1299	-299.334	0	0
13.1421	444	13.1421	431.81	13.1421	-283.484	0	0
13.1543	560	13.1543	531.21	13.1543	-266.884	0	0
13.1666	695	13.1666	637.85	13.1666	-238.524	0	0
13.1788	834	13.1788	747.44	13.1788	-209.114	0	0
13.191	964	13.191	854.66	13.191	-186.334	0	0
13.2033	1080	13.2033	953.46	13.2033	-169.134	0	0
13.2155	1161	13.2155	1037.63	13.2155	-172.304	0	0
13.2278	1208	13.2278	1101.41	13.2278	-189.084	0	0
13.24	1204	13.24	1140.11	13.24	-231.784	0	0
13.2522	1165	13.2522	1150.77	13.2522	-281.444	0	0
13.2645	1091	13.2645	1132.58	13.2645	-337.254	0	0
13.2767	991	13.2767	1087.01	13.2767	-391.684	0	0
13.2889	881	13.2889	1017.61	13.2889	-432.284	0	0
13.3012	767	13.3012	929.47	13.3012	-458.144	0	0
13.3134	658	13.3134	828.62	13.3134	-466.294	0	0
13.3256	557	13.3256	721.33	13.3256	-460.004	0	0
13.3379	472	13.3379	613.58	13.3379	-437.254	0	0
13.3501	401	13.3501	510.53	13.3501	-405.204	0	0
13.3624	348	13.3624	416.21	13.3624	-363.884	0	0
13.3746	294	13.3746	333.4	13.3746	-335.074	0	0
13.3868	252	13.3868	263.58	13.3868	-307.254	0	0
13.3991	214	13.3991	207.13	13.3991	-288.804	0	0
13.4113	187	13.4113	163.5	13.4113	-272.174	0	0
13.4235	168	13.4235	131.44	13.4235	-259.114	0	0
13.4358	153	13.4358	109.33	13.4358	-252.004	0	0
13.448	144	13.448	95.31	13.448	-246.984	0	0
13.4602	125	13.4602	87.54	13.4602	-258.214	0	0
13.4725	114	13.4725	84.23	13.4725	-265.904	0	0
13.4847	101	13.4847	83.83	13.4847	-278.504	0	0
13.4969	91	13.4969	84.98	13.4969	-289.654	0	0
13.5092	87	13.5092	86.59	13.5092	-295.264	0	0
13.5214	84	13.5214	87.85	13.5214	-299.524	0	0
13.5337	81	13.5337	88.18	13.5337	-302.854	0	0
13.5459	73	13.5459	87.28	13.5459	-309.954	0	0
13.5581	62	13.5581	85	13.5581	-318.674	0	0
13.5704	52	13.5704	81.56	13.5704	-325.234	0	0
13.5826	49	13.5826	77.1	13.5826	-323.774	0	0
13.5948	44	13.5948	71.92	13.5948	-323.594	0	0
13.6071	47	13.6071	66.32	13.6071	-314.994	0	0
13.6193	45	13.6193	60.58	13.6193	-311.254	0	0
13.6315	45	13.6315	54.95	13.6315	-305.624	0	0
13.6438	43	13.6438	49.6	13.6438	-302.274	0	0
13.656	39	13.656	44.65	13.656	-301.324	0	0
13.6683	35	13.6683	40.16	13.6683	-300.834	0	0
13.6805	33	13.6805	36.13	13.6805	-298.804	0	0
13.6927	26	13.6927	32.57	13.6927	-302.244	0	0
13.705	21	13.705	29.43	13.705	-304.104	0	0
13.7172	11	13.7172	26.68	13.7172	-311.354	0	0
13.7294	8	13.7294	24.3	13.7294	-311.974	0	0
13.7417	6	13.7417	22.23	13.7417	-311.904	0	0
13.7539	14	13.7539	20.48	13.7539	-302.154	0	0
13.7661	18	13.7661	19	13.7661	-296.674	0	0
13.7784	18	13.7784	16.83	13.7784	-294.504	0	0
13.7906	21	13.7906	14.73	13.7906	-289.404	0	0
13.8028	21	13.8028	12.88	13.8028	-287.554	0	0
13.8151	21	13.8151	11.22	13.8151	-285.894	0	0
13.8273	21	13.8273	9.73	13.8273	-284.404	0	0
13.8396	20	13.8396	8.38	13.8396	-284.054	0	0
13.8518	23	13.8518	7.14	13.8518	-279.814	0	0
13.864	21	13.864	6	13.864	-280.674	0	0
13.8763	21	13.8763	4.92	13.8763	-279.594	0	0
13.8885	22	13.8885	3.9	13.8885	-277.574	0	0
13.9007	23	13.9007	2.92	13.9007	-275.594	0	0
13.913	22	13.913	1.97	13.913	-275.644	0	0
13.9252	18	13.9252	1.04	13.9252	-278.714	0	0
13.9374	8	13.9374	0.12	13.9374	-287.794	0	0
13.9497	5	13.9497	-0.79	13.9497	-289.884	0	0
13.9619	1	13.9619	-1.7	13.9619	-292.974	0	0
13.9742	1	13.9742	-2.62	13.9742	-292.054	0	0
13.9864	1	13.9864	-3.51	13.9864	-291.164	0	0
13.9986	1	13.9986	-4.41	13.9986	-290.264	0	0
14.0109	1	14.0109	-5.3	14.0109	-289.374	0	0
14.0231	1	14.0231	-6.2	14.0231	-288.474	0	0
14.0353	1	14.0353	-7.09	14.0353	-287.584	0	0
14.0476	1	14.0476	-6.55	14.0476	-288.124	0	0
14.0598	6	14.0598	-5.9	14.0598	-283.774	0	0
14.072	11	14.072	-5.24	14.072	-279.434	0	0
14.0843	13	14.0843	-4.59	14.0843	-278.084	0	0
14.0965	16	14.0965	-3.94	14.0965	-275.734	0	0
14.1087	20	14.1087	-3.28	14.1087	-272.394	0	0
14.121	17	14.121	-2.62	14.121	-276.054	0	0
14.1332	19	14.1332	-1.96	14.1332	-274.714	0	0
14.1455	18	14.1455	-1.3	14.1455	-276.374	0	0
14.1577	20	14.1577	-0.65	14.1577	-275.024	0	0
14.1699	20	14.1699	0.01	14.1699	-275.684	0	0
14.1822	18	14.1822	0.67	14.1822	-278.344	0	0
14.1944	16	14.1944	1.33	14.1944	-281.004	0	0
14.2066	15	14.2066	1.99	14.2066	-282.664	0	0
14.2189	15	14.2189	2.65	14.2189	-283.324	0	0
14.2311	16	14.2311	3.31	14.2311	-282.984	0	0
14.2433	17	14.2433	3.97	14.2433	-282.644	0	0
14.2556	19	14.2556	4.63	14.2556	-281.304	0	0
14.2678	17	14.2678	5.29	14.2678	-283.964	0	0
14.2801	21	14.2801	5.95	14.2801	-280.624	0	0
14.2923	25	14.2923	6.61	14.2923	-277.284	0	0
14.3045	28	14.3045	7.28	14.3045	-274.954	0	0
14.3168	25	14.3168	7.94	14.3168	-278.614	0	0
14.329	22	14.329	8.6	14.329	-282.274	0	0
14.3412	20	14.3412	9.27	14.3412	-284.944	0	0
14.3535	20	14.3535	9.96	14.3535	-285.634	0	0
14.3657	20	14.3657	10.7	14.3657	-286.374	0	0
14.3779	16	14.3779	11.43	14.3779	-291.104	0	0
14.3902	17	14.3902	12.17	14.3902	-290.844	0	0
14.4024	18	14.4024	12.91	14.4024	-290.584	0	0
14.4146	19	14.4146	13.66	14.4146	-290.334	0	0
14.4269	17	14.4269	14.4	14.4269	-293.074	0	0
14.4391	20	14.4391	15.14	14.4391	-290.814	0	0
14.4514	23	14.4514	15.89	14.4514	-288.564	0	0
14.4636	27	14.4636	16.64	14.4636	-285.314	0	0
14.4758	33	14.4758	17.4	14.4758	-280.074	0	0
14.4881	37	14.4881	18.18	14.4881	-276.854	0	0
14.5003	39	14.5003	18.97	14.5003	-275.644	0	0
14.5125	39	14.5125	19.79	14.5125	-276.464	0	0
14.5248	42	14.5248	20.66	14.5248	-274.334	0	0
14.537	46	14.537	21.44	14.537	-271.114	0	0
14.5492	47	14.5492	22.48	14.5492	-271.154	0	0
14.5615	49	14.5615	23.66	14.5615	-270.334	0	0
14.5737	48	14.5737	25.02	14.5737	-272.694	0	0
14.586	49	14.586	26.63	14.586	-273.304	0	0
14.5982	48	14.5982	28.55	14.5982	-276.224	0	0
14.6104	48	14.6104	30.84	14.6104	-278.514	0	0
14.6227	46	14.6227	33.56	14.6227	-283.234	0	0
14.6349	41	14.6349	36.77	14.6349	-291.444	0	0
14.6471	39	14.6471	40.48	14.6471	-297.154	0	0
14.6594	34	14.6594	44.67	14.6594	-306.344	0	0
14.6716	35	14.6716	49.29	14.6716	-309.964	0	0
14.6838	36	14.6838	54.24	14.6838	-313.914	0	0
14.6961	39	14.6961	59.35	14.6961	-316.024	0	0
14.7083	42	14.7083	64.43	14.7083	-318.104	0	0
14.7205	49	14.7205	69.24	14.7205	-315.914	0	0
14.7328	56	14.7328	73.53	14.7328	-313.204	0	0
14.745	60	14.745	76.19	14.745	-311.864	0	0
14.7573	66	14.7573	77.44	14.7573	-307.114	0	0
14.7695	68	14.7695	77.59	14.7695	-305.264	0	0
14.7817	68	14.7817	76.6	14.7817	-304.274	0	0
14.794	63	14.794	74.49	14.794	-307.164	0	0
14.8062	55	14.8062	71.38	14.8062	-312.054	0	0
14.8184	46	14.8184	67.45	14.8184	-317.124	0	0
14.8307	43	14.8307	62.94	14.8307	-315.614	0	0
14.8429	43	14.8429	58.11	14.8429	-310.784	0	0
14.8551	39	14.8551	53.18	14.8551	-309.854	0	0
14.8674	39	14.8674	48.39	14.8674	-305.064	0	0
14.8796	37	14.8796	43.91	14.8796	-302.584	0	0
14.8919	33	14.8919	39.88	14.8919	-302.554	0	0
14.9041	31	14.9041	36.37	14.9041	-301.044	0	0
14.9163	31	14.9163	33.42	14.9163	-298.094	0	0
14.9286	34	14.9286	31.03	14.9286	-292.704	0	0
14.9408	35	14.9408	29.15	14.9408	-289.824	0	0
14.953	38	14.953	27.73	14.953	-285.404	0	0
14.9653	38	14.9653	26.7	14.9653	-284.374	0	0
14.9775	42	14.9775	25.96	14.9775	-279.634	0	0
14.9897	42	14.9897	25.44	14.9897	-279.114	0	0
15.002	43	15.002	25.06	15.002	-277.734	0	0
15.0142	39	15.0142	24.75	15.0142	-281.424	0	0
15.0264	36	15.0264	24.43	15.0264	-284.104	0	0
15.0387	30	15.0387	24.06	15.0387	-289.734	0	0
15.0509	21	15.0509	23.6	15.0509	-298.274	0	0
15.0632	13	15.0632	23.02	15.0632	-305.694	0	0
15.0754	11	15.0754	22.3	15.0754	-306.974	0	0
15.0876	9	15.0876	21.69	15.0876	-308.364	0	0
15.0999	9	15.0999	21.12	15.0999	-307.794	0	0
15.1121	9	15.1121	20.47	15.1121	-307.144	0	0
15.1243	13	15.1243	19.79	15.1243	-302.464	0	0
15.1366	13	15.1366	19.12	15.1366	-301.794	0	0
15.1488	14	15.1488	18.54	15.1488	-300.214	0	0
15.161	12	15.161	18.1	15.161	-301.774	0	0
15.1733	10	15.1733	17.87	15.1733	-303.544	0	0
15.1855	12	15.1855	17.94	15.1855	-301.614	0	0
15.1978	16	15.1978	18.41	15.1978	-298.084	0	0
15.21	21	15.21	19.36	15.21	-294.034	0	0
15.2222	24	15.2222	20.93	15.2222	-292.604	0	0
15.2345	28	15.2345	23.2	15.2345	-290.874	0	0
15.2467	30	15.2467	26.3	15.2467	-291.974	0	0
15.2589	39	15.2589	30.28	15.2589	-286.954	0	0
15.2712	44	15.2712	35.19	15.2712	-286.864	0	0
15.2834	54	15.2834	41	15.2834	-282.674	0	0
15.2956	59	15.2956	47.61	15.2956	-284.284	0	0
15.3079	62	15.3079	54.83	15.3079	-288.504	0	0
15.3201	67	15.3201	62.39	15.3201	-291.064	0	0
15.3323	70	15.3323	69.93	15.3323	-295.604	0	0
15.3446	72	15.3446	77.04	15.3446	-300.714	0	0
15.3568	71	15.3568	83.29	15.3568	-307.964	0	0
15.3691	70	15.3691	88.25	15.3691	-313.924	0	0
15.3813	72	15.3813	91.55	15.3813	-315.224	0	0
15.3935	73	15.3935	92.93	15.3935	-315.604	0	0
15.4058	74	15.4058	92.26	15.4058	-313.934	0	0
15.418	73	15.418	89.58	15.418	-312.254	0	0
15.4302	72	15.4302	85.08	15.4302	-308.754	0	0
15.4425	74	15.4425	79.05	15.4425	-300.724	0	0
15.4547	69	15.4547	71.91	15.4547	-298.584	0	0
15.4669	67	15.4669	64.08	15.4669	-292.754	0	0
15.4792	63	15.4792	56	15.4792	-288.674	0	0
15.4914	60	15.4914	48.05	15.4914	-283.724	0	0
15.5037	57	15.5037	40.55	15.5037	-279.224	0	0
15.5159	52	15.5159	33.73	15.5159	-277.404	0	0
15.5281	48	15.5281	27.75	15.5281	-275.424	0	0
15.5404	38	15.5404	22.65	15.5404	-280.324	0	0
15.5526	30	15.5526	18.44	15.5526	-284.114	0	0
15.5648	20	15.5648	15.05	15.5648	-290.724	0	0
15.5771	14	15.5771	12.37	15.5771	-294.044	0	0
15.5893	12	15.5893	10.31	15.5893	-293.984	0	0
15.6015	7	15.6015	8.75	15.6015	-297.424	0	0
15.6138	7	15.6138	7.56	15.6138	-296.234	0	0
15.626	5	15.626	6.67	15.626	-297.344	0	0
15.6382	2	15.6382	6.12	15.6382	-299.794	0	0
15.6505	4	15.6505	5.82	15.6505	-297.494	0	0
15.6627	5	15.6627	5.63	15.6627	-296.304	0	0
15.675	6	15.675	5.51	15.675	-295.184	0	0
15.6872	2	15.6872	5.42	15.6872	-299.094	0	0
15.6994	1	15.6994	5.37	15.6994	-300.044	0	0
15.7117	1	15.7117	5.34	15.7117	-300.014	0	0
15.7239	1	15.7239	5.31	15.7239	-299.984	0	0
15.7361	1	15.7361	5.3	15.7361	-299.974	0	0
15.7484	1	15.7484	5.28	15.7484	-299.954	0	0
15.7606	3	15.7606	5.27	15.7606	-297.944	0	0
15.7728	6	15.7728	5.26	15.7728	-294.934	0	0
15.7851	4	15.7851	5.25	15.7851	-296.924	0	0
15.7973	1	15.7973	5.24	15.7973	-299.914	0	0
15.8096	1	15.8096	5.24	15.8096	-299.914	0	0
15.8218	1	15.8218	5.23	15.8218	-299.904	0	0
15.834	1	15.834	5.23	15.834	-299.904	0	0
15.8463	3	15.8463	5.22	15.8463	-297.894	0	0
15.8585	1	15.8585	5.22	15.8585	-299.894	0	0

## Sheet: Supplementary Figure 7c
Supplementary Figure 7c
zeta-N2 90 GPa
powder data provided by Gregoryanz from his 2007 paper
2theta	Observed Intensity	2theta	Calculated Intensity	2theta	Difference between observed and calculated intensity	2theta position of tick marks
9.0061	1	9.0061	23.78	9.0061	-407.984
9.0184	1	9.0184	24.94	9.0184	-409.144	10.0334	-87.143
9.0306	1	9.0306	25.79	9.0306	-409.994	10.1297	-87.143
9.0429	1	9.0429	26.22	9.0429	-410.424	10.6551	-87.143
9.0551	3	9.0551	26.33	9.0551	-408.534	10.82	-87.143
9.0673	9	9.0673	26.1	9.0673	-402.304	10.8871	-87.143
9.0796	15	9.0796	25.53	9.0796	-395.734	11.1927	-87.143
9.0918	14	9.0918	24.64	9.0918	-395.844	11.3253	-87.143
9.104	19	9.104	23.47	9.104	-389.674	11.6508	-87.143
9.1163	21	9.1163	22.08	9.1163	-386.284	11.7132	-87.143
9.1285	24	9.1285	20.54	9.1285	-381.744	11.7606	-87.143
9.1407	26	9.1407	18.91	9.1407	-378.114	12.3813	-87.143
9.153	23	9.153	17.27	9.153	-379.474	12.6234	-87.143
9.1652	34	9.1652	15.66	9.1652	-366.864	12.6262	-87.143
9.1775	31	9.1775	14.14	9.1775	-368.344	12.8701	-87.143
9.1897	34	9.1897	12.75	9.1897	-363.954	12.9912	-87.143
9.2019	29	9.2019	11.5	9.2019	-367.704	13.304	-87.143
9.2142	27	9.2142	10.4	9.2142	-368.604	13.6042	-87.143
9.2264	25	9.2264	9.45	9.2264	-369.654	13.7341	-87.143
9.2386	19	9.2386	8.63	9.2386	-374.834	14.9184	-87.143
9.2509	18	9.2509	7.94	9.2509	-375.144	15.0582	-87.143
9.2631	18	9.2631	7.36	9.2631	-374.564	15.0743	-87.143
9.2753	18	9.2753	6.86	9.2753	-374.064	15.2402	-87.143
9.2876	16	9.2876	6.43	9.2876	-375.634	15.2954	-87.143
9.2998	9	9.2998	6.06	9.2998	-382.264	15.4612	-87.143
9.312	9	9.312	5.75	9.312	-381.954	15.5265	-87.143
9.3243	2	9.3243	5.44	9.3243	-388.644	15.5866	-87.143
9.3365	3	9.3365	5.16	9.3365	-387.364	15.5872	-87.143
9.3488	1	9.3488	4.89	9.3488	-389.094	15.6489	-87.143
9.361	1	9.361	4.63	9.361	-388.834	15.8443	-87.143
9.3732	1	9.3732	4.37	9.3732	-388.574	15.895	-87.143
9.3855	1	9.3855	4.12	9.3855	-388.324	0	0
9.3977	1	9.3977	3.88	9.3977	-388.084	0	0
9.4099	1	9.4099	3.63	9.4099	-387.834	0	0
9.4222	2	9.4222	3.39	9.4222	-386.594	0	0
9.4344	2	9.4344	3.15	9.4344	-386.354	0	0
9.4466	9	9.4466	2.9	9.4466	-379.104	0	0
9.4589	15	9.4589	2.66	9.4589	-372.864	0	0
9.4711	19	9.4711	2.42	9.4711	-368.624	0	0
9.4834	26	9.4834	2.21	9.4834	-361.414	0	0
9.4956	25	9.4956	1.97	9.4956	-362.174	0	0
9.5078	22	9.5078	1.73	9.5078	-364.934	0	0
9.5201	19	9.5201	1.5	9.5201	-367.704	0	0
9.5323	18	9.5323	1.26	9.5323	-368.464	0	0
9.5445	17	9.5445	1.03	9.5445	-369.234	0	0
9.5568	16	9.5568	0.8	9.5568	-370.004	0	0
9.569	16	9.569	0.56	9.569	-369.764	0	0
9.5812	12	9.5812	0.33	9.5812	-373.534	0	0
9.5935	13	9.5935	0.11	9.5935	-372.314	0	0
9.6057	12	9.6057	-0.12	9.6057	-373.084	0	0
9.6179	5	9.6179	-0.34	9.6179	-379.864	0	0
9.6302	4	9.6302	-0.57	9.6302	-380.634	0	0
9.6424	3	9.6424	-0.79	9.6424	-381.414	0	0
9.6547	2	9.6547	-1.01	9.6547	-382.194	0	0
9.6669	1	9.6669	-1.22	9.6669	-382.984	0	0
9.6791	1	9.6791	-1.44	9.6791	-382.764	0	0
9.6914	1	9.6914	-1.64	9.6914	-382.564	0	0
9.7036	1	9.7036	-1.85	9.7036	-382.354	0	0
9.7158	1	9.7158	-2.05	9.7158	-382.154	0	0
9.7281	1	9.7281	-2.24	9.7281	-381.964	0	0
9.7403	1	9.7403	-2.42	9.7403	-381.784	0	0
9.7525	4	9.7525	-2.58	9.7525	-378.624	0	0
9.7648	5	9.7648	-2.71	9.7648	-377.494	0	0
9.777	9	9.777	-2.81	9.777	-373.394	0	0
9.7893	12	9.7893	-2.85	9.7893	-370.354	0	0
9.8015	6	9.8015	-2.79	9.8015	-376.414	0	0
9.8137	1	9.8137	-2.6	9.8137	-381.604	0	0
9.826	1	9.826	-1.8	9.826	-382.404	0	0
9.8382	1	9.8382	-0.55	9.8382	-383.654	0	0
9.8504	1	9.8504	1.17	9.8504	-385.374	0	0
9.8627	3	9.8627	3.56	9.8627	-385.764	0	0
9.8749	13	9.8749	6.92	9.8749	-379.124	0	0
9.8871	22	9.8871	11.61	9.8871	-374.814	0	0
9.8994	25	9.8994	18.13	9.8994	-378.334	0	0
9.9116	28	9.9116	27.06	9.9116	-384.264	0	0
9.9238	33	9.9238	39.13	9.9238	-391.334	0	0
9.9361	41	9.9361	55.15	9.9361	-399.354	0	0
9.9483	58	9.9483	75.98	9.9483	-403.184	0	0
9.9606	81	9.9606	102.5	9.9606	-406.704	0	0
9.9728	115	9.9728	135.48	9.9728	-405.684	0	0
9.985	156	9.985	175.58	9.985	-404.784	0	0
9.9973	206	9.9973	222.88	9.9973	-402.084	0	0
10.0095	270	10.0095	277.23	10.0095	-392.434	0	0
10.0217	327	10.0217	337.86	10.0217	-396.064	0	0
10.034	394	10.034	403.34	10.034	-394.544	0	0
10.0462	457	10.0462	471.57	10.0462	-399.774	0	0
10.0584	521	10.0584	539.89	10.0584	-404.094	0	0
10.0707	589	10.0707	605.17	10.0707	-401.374	0	0
10.0829	640	10.0829	664.01	10.0829	-409.214	0	0
10.0952	687	10.0952	713.06	10.0952	-411.264	0	0
10.1074	725	10.1074	749.3	10.1074	-409.504	0	0
10.1196	734	10.1196	770.33	10.1196	-421.534	0	0
10.1319	749	10.1319	774.73	10.1319	-410.934	0	0
10.1441	736	10.1441	762.15	10.1441	-411.354	0	0
10.1563	718	10.1563	733.44	10.1563	-400.644	0	0
10.1686	687	10.1686	690.49	10.1686	-388.694	0	0
10.1808	640	10.1808	636.03	10.1808	-381.234	0	0
10.193	578	10.193	573.31	10.193	-380.514	0	0
10.2053	512	10.2053	505.79	10.2053	-378.994	0	0
10.2175	451	10.2175	436.83	10.2175	-371.034	0	0
10.2297	388	10.2297	369.43	10.2297	-366.634	0	0
10.242	333	10.242	306.07	10.242	-358.274	0	0
10.2542	284	10.2542	248.54	10.2542	-349.744	0	0
10.2665	236	10.2665	197.99	10.2665	-347.194	0	0
10.2787	189	10.2787	154.92	10.2787	-351.124	0	0
10.2909	148	10.2909	119.3	10.2909	-356.504	0	0
10.3032	115	10.3032	90.66	10.3032	-360.864	0	0
10.3154	87	10.3154	68.31	10.3154	-366.514	0	0
10.3276	68	10.3276	51.31	10.3276	-368.514	0	0
10.3399	50	10.3399	38.78	10.3399	-373.984	0	0
10.3521	36	10.3521	29.83	10.3521	-379.034	0	0
10.3643	23	10.3643	23.69	10.3643	-385.894	0	0
10.3766	16	10.3766	19.75	10.3766	-388.954	0	0
10.3888	13	10.3888	17.49	10.3888	-389.694	0	0
10.4011	10	10.4011	16.6	10.4011	-391.804	0	0
10.4133	9	10.4133	16.88	10.4133	-393.084	0	0
10.4255	4	10.4255	18.02	10.4255	-399.224	0	0
10.4378	2	10.4378	20.23	10.4378	-403.434	0	0
10.45	7	10.45	23.78	10.45	-401.984	0	0
10.4622	10	10.4622	28.94	10.4622	-404.144	0	0
10.4745	15	10.4745	36	10.4745	-406.204	0	0
10.4867	25	10.4867	45.29	10.4867	-405.494	0	0
10.4989	30	10.4989	57.13	10.4989	-412.334	0	0
10.5112	39	10.5112	71.75	10.5112	-417.954	0	0
10.5234	49	10.5234	89.3	10.5234	-425.504	0	0
10.5356	66	10.5356	109.74	10.5356	-428.944	0	0
10.5479	94	10.5479	132.8	10.5479	-424.004	0	0
10.5601	123	10.5601	158.02	10.5601	-420.224	0	0
10.5724	166	10.5724	184.67	10.5724	-403.874	0	0
10.5846	204	10.5846	211.83	10.5846	-393.034	0	0
10.5968	242	10.5968	238.41	10.5968	-381.614	0	0
10.6091	286	10.6091	263.26	10.6091	-362.464	0	0
10.6213	322	10.6213	285.29	10.6213	-348.494	0	0
10.6335	350	10.6335	303.56	10.6335	-338.764	0	0
10.6458	373	10.6458	317.4	10.6458	-329.604	0	0
10.658	382	10.658	326.48	10.658	-329.684	0	0
10.6702	386	10.6702	330.89	10.6702	-330.094	0	0
10.6825	380	10.6825	331.1	10.6825	-336.304	0	0
10.6947	368	10.6947	327.87	10.6947	-345.074	0	0
10.707	356	10.707	322.15	10.707	-351.354	0	0
10.7192	338	10.7192	314.89	10.7192	-362.094	0	0
10.7314	319	10.7314	306.96	10.7314	-373.164	0	0
10.7437	310	10.7437	299	10.7437	-374.204	0	0
10.7559	299	10.7559	291.33	10.7559	-377.534	0	0
10.7681	291	10.7681	284	10.7681	-378.204	0	0
10.7804	282	10.7804	276.74	10.7804	-379.944	0	0
10.7926	269	10.7926	269.1	10.7926	-385.304	0	0
10.8048	261	10.8048	260.5	10.8048	-384.704	0	0
10.8171	246	10.8171	250.39	10.8171	-389.594	0	0
10.8293	234	10.8293	238.35	10.8293	-389.554	0	0
10.8415	218	10.8415	224.17	10.8415	-391.374	0	0
10.8538	201	10.8538	207.92	10.8538	-392.124	0	0
10.866	182	10.866	189.87	10.866	-393.074	0	0
10.8783	163	10.8783	170.53	10.8783	-392.734	0	0
10.8905	144	10.8905	150.5	10.8905	-391.704	0	0
10.9027	130	10.9027	130.47	10.9027	-385.674	0	0
10.915	111	10.915	111.07	10.915	-385.274	0	0
10.9272	96	10.9272	92.89	10.9272	-382.094	0	0
10.9394	80	10.9394	76.36	10.9394	-381.564	0	0
10.9517	73	10.9517	61.79	10.9517	-373.994	0	0
10.9639	59	10.9639	49.3	10.9639	-375.504	0	0
10.9761	46	10.9761	38.92	10.9761	-378.124	0	0
10.9884	36	10.9884	30.55	10.9884	-379.754	0	0
11.0006	27	11.0006	24.03	11.0006	-382.234	0	0
11.0129	15	11.0129	19.16	11.0129	-389.364	0	0
11.0251	4	11.0251	15.7	11.0251	-396.904	0	0
11.0373	1	11.0373	13.56	11.0373	-397.764	0	0
11.0496	1	11.0496	12.67	11.0496	-396.874	0	0
11.0618	1	11.0618	13.11	11.0618	-397.314	0	0
11.074	4	11.074	14.93	11.074	-396.134	0	0
11.0863	20	11.0863	18.48	11.0863	-383.684	0	0
11.0985	26	11.0985	24.24	11.0985	-383.444	0	0
11.1107	35	11.1107	32.82	11.1107	-383.024	0	0
11.123	50	11.123	45.05	11.123	-380.254	0	0
11.1352	67	11.1352	61.84	11.1352	-380.044	0	0
11.1474	97	11.1474	84.24	11.1474	-372.444	0	0
11.1597	131	11.1597	113.26	11.1597	-367.464	0	0
11.1719	169	11.1719	149.85	11.1719	-366.054	0	0
11.1842	222	11.1842	194.66	11.1842	-357.864	0	0
11.1964	269	11.1964	247.96	11.1964	-364.164	0	0
11.2086	332	11.2086	309.46	11.2086	-362.664	0	0
11.2209	398	11.2209	378.17	11.2209	-365.374	0	0
11.2331	460	11.2331	452.32	11.2331	-377.524	0	0
11.2453	539	11.2453	529.37	11.2453	-375.574	0	0
11.2576	608	11.2576	606.1	11.2576	-383.304	0	0
11.2698	683	11.2698	678.78	11.2698	-380.984	0	0
11.282	744	11.282	743.44	11.282	-384.644	0	0
11.2943	797	11.2943	796.21	11.2943	-384.414	0	0
11.3065	836	11.3065	833.73	11.3065	-382.934	0	0
11.3188	853	11.3188	853.43	11.3188	-385.634	0	0
11.331	847	11.331	853.94	11.331	-392.144	0	0
11.3432	827	11.3432	835.23	11.3432	-393.434	0	0
11.3555	789	11.3555	798.63	11.3555	-394.834	0	0
11.3677	741	11.3677	746.64	11.3677	-390.844	0	0
11.3799	676	11.3799	682.66	11.3799	-391.864	0	0
11.3922	611	11.3922	610.61	11.3922	-384.814	0	0
11.4044	541	11.4044	534.56	11.4044	-378.764	0	0
11.4166	472	11.4166	458.42	11.4166	-371.624	0	0
11.4289	401	11.4289	385.64	11.4289	-369.844	0	0
11.4411	338	11.4411	319.04	11.4411	-366.244	0	0
11.4533	277	11.4533	260.72	11.4533	-368.924	0	0
11.4656	231	11.4656	212.05	11.4656	-366.254	0	0
11.4778	193	11.4778	173.73	11.4778	-365.934	0	0
11.4901	162	11.4901	145.86	11.4901	-369.064	0	0
11.5023	136	11.5023	128.31	11.5023	-377.514	0	0
11.5145	117	11.5145	120.46	11.5145	-388.664	0	0
11.5268	110	11.5268	121.54	11.5268	-396.744	0	0
11.539	110	11.539	130.69	11.539	-405.894	0	0
11.5512	125	11.5512	147	11.5512	-407.204	0	0
11.5635	150	11.5635	169.48	11.5635	-404.684	0	0
11.5757	182	11.5757	197.14	11.5757	-400.344	0	0
11.5879	222	11.5879	228.95	11.5879	-392.154	0	0
11.6002	269	11.6002	263.86	11.6002	-380.064	0	0
11.6124	314	11.6124	300.76	11.6124	-371.964	0	0
11.6247	366	11.6247	338.52	11.6247	-357.724	0	0
11.6369	410	11.6369	375.99	11.6369	-351.194	0	0
11.6491	452	11.6491	412.03	11.6491	-345.234	0	0
11.6614	490	11.6614	445.51	11.6614	-340.714	0	0
11.6736	515	11.6736	475.36	11.6736	-345.564	0	0
11.6858	538	11.6858	500.54	11.6858	-347.744	0	0
11.6981	544	11.6981	520.08	11.6981	-361.284	0	0
11.7103	548	11.7103	533.09	11.7103	-370.294	0	0
11.7225	542	11.7225	538.82	11.7225	-382.024	0	0
11.7348	528	11.7348	536.71	11.7348	-393.914	0	0
11.747	505	11.747	526.5	11.747	-406.704	0	0
11.7592	475	11.7592	508.25	11.7592	-418.454	0	0
11.7715	442	11.7715	482.45	11.7715	-425.654	0	0
11.7837	407	11.7837	450	11.7837	-428.204	0	0
11.796	372	11.796	412.14	11.796	-425.344	0	0
11.8082	336	11.8082	370.41	11.8082	-419.614	0	0
11.8204	302	11.8204	326.49	11.8204	-409.694	0	0
11.8327	265	11.8327	282.05	11.8327	-402.254	0	0
11.8449	237	11.8449	238.64	11.8449	-386.844	0	0
11.8571	211	11.8571	197.61	11.8571	-371.814	0	0
11.8694	183	11.8694	159.98	11.8694	-362.184	0	0
11.8816	155	11.8816	126.48	11.8816	-356.684	0	0
11.8938	121	11.8938	97.48	11.8938	-361.684	0	0
11.9061	97	11.9061	73.05	11.9061	-361.254	0	0
11.9183	75	11.9183	53.01	11.9183	-363.214	0	0
11.9306	54	11.9306	36.98	11.9306	-368.184	0	0
11.9428	42	11.9428	24.48	11.9428	-367.684	0	0
11.955	27	11.955	14.96	11.955	-373.164	0	0
11.9673	17	11.9673	7.87	11.9673	-376.074	0	0
11.9795	1	11.9795	2.71	11.9795	-386.914	0	0
11.9917	1	11.9917	-0.82	11.9917	-383.384	0	0
12.004	1	12.004	-3.44	12.004	-380.764	0	0
12.0162	1	12.0162	-5.23	12.0162	-378.974	0	0
12.0284	1	12.0284	-6.42	12.0284	-377.784	0	0
12.0407	1	12.0407	-7.09	12.0407	-377.114	0	0
12.0529	1	12.0529	-7.48	12.0529	-376.724	0	0
12.0651	1	12.0651	-7.66	12.0651	-376.544	0	0
12.0774	7	12.0774	-7.66	12.0774	-370.544	0	0
12.0896	5	12.0896	-7.49	12.0896	-372.714	0	0
12.1019	6	12.1019	-7.11	12.1019	-372.094	0	0
12.1141	8	12.1141	-6.43	12.1141	-370.774	0	0
12.1263	15	12.1263	-5.34	12.1263	-364.864	0	0
12.1386	22	12.1386	-3.65	12.1386	-359.554	0	0
12.1508	28	12.1508	-1.12	12.1508	-356.084	0	0
12.163	43	12.163	2.55	12.163	-344.754	0	0
12.1753	56	12.1753	7.74	12.1753	-336.944	0	0
12.1875	74	12.1875	14.95	12.1875	-326.154	0	0
12.1997	92	12.1997	24.67	12.1997	-317.874	0	0
12.212	110	12.212	37.41	12.212	-312.614	0	0
12.2242	128	12.2242	53.66	12.2242	-310.864	0	0
12.2365	148	12.2365	73.83	12.2365	-311.034	0	0
12.2487	169	12.2487	98.14	12.2487	-314.344	0	0
12.2609	190	12.2609	126.56	12.2609	-321.764	0	0
12.2732	205	12.2732	158.74	12.2732	-338.944	0	0
12.2854	222	12.2854	193.97	12.2854	-357.174	0	0
12.2976	240	12.2976	231.13	12.2976	-376.334	0	0
12.3099	256	12.3099	268.76	12.3099	-397.964	0	0
12.3221	270	12.3221	305.11	12.3221	-420.314	0	0
12.3343	272	12.3343	338.25	12.3343	-451.454	0	0
12.3466	283	12.3466	366.28	12.3466	-468.484	0	0
12.3588	298	12.3588	387.48	12.3588	-474.684	0	0
12.371	309	12.371	400.49	12.371	-476.694	0	0
12.3833	321	12.3833	404.54	12.3833	-468.744	0	0
12.3955	316	12.3955	399.5	12.3955	-468.704	0	0
12.4078	306	12.4078	385.96	12.4078	-465.164	0	0
12.42	300	12.42	365.17	12.42	-450.374	0	0
12.4322	289	12.4322	338.87	12.4322	-435.074	0	0
12.4445	275	12.4445	309.15	12.4445	-419.354	0	0
12.4567	257	12.4567	278.18	12.4567	-406.384	0	0
12.4689	243	12.4689	248.08	12.4689	-390.284	0	0
12.4812	237	12.4812	220.69	12.4812	-368.894	0	0
12.4934	231	12.4934	197.47	12.4934	-351.674	0	0
12.5056	234	12.5056	179.35	12.5056	-330.554	0	0
12.5179	229	12.5179	166.76	12.5179	-322.964	0	0
12.5301	227	12.5301	159.59	12.5301	-317.794	0	0
12.5424	218	12.5424	157.23	12.5424	-324.434	0	0
12.5546	218	12.5546	158.73	12.5546	-325.934	0	0
12.5668	209	12.5668	162.85	12.5668	-339.054	0	0
12.5791	205	12.5791	168.23	12.5791	-348.434	0	0
12.5913	199	12.5913	173.51	12.5913	-359.714	0	0
12.6035	191	12.6035	177.44	12.6035	-371.644	0	0
12.6158	180	12.6158	179.04	12.6158	-384.244	0	0
12.628	162	12.628	177.65	12.628	-400.854	0	0
12.6402	152	12.6402	172.99	12.6402	-406.194	0	0
12.6525	135	12.6525	165.14	12.6525	-415.344	0	0
12.6647	127	12.6647	154.54	12.6647	-412.744	0	0
12.6769	113	12.6769	141.79	12.6769	-413.994	0	0
12.6892	99	12.6892	127.93	12.6892	-414.134	0	0
12.7014	88	12.7014	113.78	12.7014	-410.984	0	0
12.7137	80	12.7137	100.22	12.7137	-405.424	0	0
12.7259	74	12.7259	88.02	12.7259	-399.224	0	0
12.7381	67	12.7381	77.78	12.7381	-395.984	0	0
12.7504	58	12.7504	69.89	12.7504	-397.094	0	0
12.7626	61	12.7626	64.5	12.7626	-388.704	0	0
12.7748	54	12.7748	61.53	12.7748	-392.734	0	0
12.7871	55	12.7871	60.72	12.7871	-390.924	0	0
12.7993	59	12.7993	61.64	12.7993	-387.844	0	0
12.8115	62	12.8115	63.73	12.8115	-386.934	0	0
12.8238	71	12.8238	66.39	12.8238	-380.594	0	0
12.836	76	12.836	69.02	12.836	-378.224	0	0
12.8483	82	12.8483	71.07	12.8483	-374.274	0	0
12.8605	90	12.8605	72.09	12.8605	-367.294	0	0
12.8727	87	12.8727	71.75	12.8727	-369.954	0	0
12.885	84	12.885	69.9	12.885	-371.104	0	0
12.8972	75	12.8972	66.54	12.8972	-376.744	0	0
12.9094	69	12.9094	61.82	12.9094	-378.024	0	0
12.9217	59	12.9217	56	12.9217	-382.204	0	0
12.9339	52	12.9339	49.39	12.9339	-382.594	0	0
12.9461	41	12.9461	42.38	12.9461	-386.584	0	0
12.9584	35	12.9584	35.32	12.9584	-385.524	0	0
12.9706	23	12.9706	28.55	12.9706	-390.754	0	0
12.9828	19	12.9828	22.37	12.9828	-388.574	0	0
12.9951	12	12.9951	17	12.9951	-390.204	0	0
13.0073	13	13.0073	12.72	13.0073	-384.924	0	0
13.0196	6	13.0196	9.71	13.0196	-388.914	0	0
13.0318	1	13.0318	8.23	13.0318	-392.434	0	0
13.044	1	13.044	8.61	13.044	-392.814	0	0
13.0563	1	13.0563	11.31	13.0563	-395.514	0	0
13.0685	1	13.0685	16.99	13.0685	-401.194	0	0
13.0807	1	13.0807	26.54	13.0807	-410.744	0	0
13.093	16	13.093	41.83	13.093	-411.034	0	0
13.1052	43	13.1052	63.66	13.1052	-405.864	0	0
13.1174	74	13.1174	93.66	13.1174	-404.864	0	0
13.1297	116	13.1297	133.59	13.1297	-402.794	0	0
13.1419	168	13.1419	185.24	13.1419	-402.444	0	0
13.1542	228	13.1542	250.2	13.1542	-407.404	0	0
13.1664	310	13.1664	329.61	13.1664	-404.814	0	0
13.1786	410	13.1786	423.8	13.1786	-399.004	0	0
13.1909	525	13.1909	532.1	13.1909	-392.304	0	0
13.2031	663	13.2031	652.56	13.2031	-374.764	0	0
13.2153	815	13.2153	781.83	13.2153	-352.034	0	0
13.2276	987	13.2276	915.22	13.2276	-313.424	0	0
13.2398	1153	13.2398	1046.82	13.2398	-279.024	0	0
13.252	1310	13.252	1169.94	13.252	-245.144	0	0
13.2643	1435	13.2643	1277.54	13.2643	-227.744	0	0
13.2765	1525	13.2765	1362.96	13.2765	-223.164	0	0
13.2887	1577	13.2887	1420.54	13.2887	-228.744	0	0
13.301	1582	13.301	1446.32	13.301	-249.524	0	0
13.3132	1537	13.3132	1438.48	13.3132	-286.684	0	0
13.3255	1445	13.3255	1397.67	13.3255	-337.874	0	0
13.3377	1309	13.3377	1326.88	13.3377	-403.084	0	0
13.3499	1156	13.3499	1231.03	13.3499	-460.234	0	0
13.3622	1002	13.3622	1116.41	13.3622	-499.614	0	0
13.3744	849	13.3744	989.99	13.3744	-526.194	0	0
13.3866	719	13.3866	858.72	13.3866	-524.924	0	0
13.3989	602	13.3989	729	13.3989	-512.204	0	0
13.4111	504	13.4111	606.19	13.4111	-487.394	0	0
13.4233	426	13.4233	494.36	13.4233	-453.564	0	0
13.4356	359	13.4356	396.18	13.4356	-422.384	0	0
13.4478	311	13.4478	312.97	13.4478	-387.174	0	0
13.4601	265	13.4601	244.9	13.4601	-365.104	0	0
13.4723	235	13.4723	191.17	13.4723	-341.374	0	0
13.4845	206	13.4845	150.38	13.4845	-329.584	0	0
13.4968	185	13.4968	120.71	13.4968	-320.914	0	0
13.509	169	13.509	100.24	13.509	-316.444	0	0
13.5212	155	13.5212	87.02	13.5212	-317.224	0	0
13.5335	140	13.5335	79.28	13.5335	-324.484	0	0
13.5457	131	13.5457	75.45	13.5457	-329.654	0	0
13.5579	117	13.5579	74.19	13.5579	-342.394	0	0
13.5702	105	13.5702	74.45	13.5702	-354.654	0	0
13.5824	91	13.5824	75.38	13.5824	-369.584	0	0
13.5946	83	13.5946	76.38	13.5946	-378.584	0	0
13.6069	76	13.6069	77.02	13.6069	-386.224	0	0
13.6191	65	13.6191	77.06	13.6191	-397.264	0	0
13.6314	59	13.6314	76.41	13.6314	-402.614	0	0
13.6436	48	13.6436	75.08	13.6436	-412.284	0	0
13.6558	46	13.6558	73.17	13.6558	-412.374	0	0
13.6681	41	13.6681	70.81	13.6681	-415.014	0	0
13.6803	46	13.6803	68.17	13.6803	-407.374	0	0
13.6925	41	13.6925	65.41	13.6925	-409.614	0	0
13.7048	43	13.7048	62.65	13.7048	-404.854	0	0
13.717	32	13.717	59.97	13.717	-413.174	0	0
13.7292	29	13.7292	54.83	13.7292	-411.034	0	0
13.7415	24	13.7415	49.66	13.7415	-410.864	0	0
13.7537	26	13.7537	44.76	13.7537	-403.964	0	0
13.766	26	13.766	40.13	13.766	-399.334	0	0
13.7782	23	13.7782	35.76	13.7782	-397.964	0	0
13.7904	26	13.7904	31.63	13.7904	-390.834	0	0
13.8027	26	13.8027	27.74	13.8027	-386.944	0	0
13.8149	24	13.8149	24.06	13.8149	-385.264	0	0
13.8271	26	13.8271	20.58	13.8271	-379.784	0	0
13.8394	24	13.8394	17.29	13.8394	-378.494	0	0
13.8516	27	13.8516	14.17	13.8516	-372.374	0	0
13.8638	29	13.8638	11.22	13.8638	-367.424	0	0
13.8761	29	13.8761	8.41	13.8761	-364.614	0	0
13.8883	30	13.8883	5.73	13.8883	-360.934	0	0
13.9005	26	13.9005	3.17	13.9005	-362.374	0	0
13.9128	23	13.9128	0.7	13.9128	-362.904	0	0
13.925	15	13.925	-0.73	13.925	-369.474	0	0
13.9373	1	13.9373	0.04	13.9373	-384.244	0	0
13.9495	1	13.9495	0.85	13.9495	-385.054	0	0
13.9617	1	13.9617	1.68	13.9617	-385.884	0	0
13.974	1	13.974	2.56	13.974	-386.764	0	0
13.9862	1	13.9862	3.46	13.9862	-387.664	0	0
13.9984	1	13.9984	4.38	13.9984	-388.584	0	0
14.0107	4	14.0107	5.31	14.0107	-386.514	0	0
14.0229	1	14.0229	6.24	14.0229	-390.444	0	0
14.0351	1	14.0351	7.18	14.0351	-391.384	0	0
14.0474	1	14.0474	8.12	14.0474	-392.324	0	0
14.0596	1	14.0596	9.06	14.0596	-393.264	0	0
14.0719	3	14.0719	10.01	14.0719	-392.214	0	0
14.0841	10	14.0841	10.96	14.0841	-386.164	0	0
14.0963	16	14.0963	11.9	14.0963	-381.104	0	0
14.1086	21	14.1086	12.85	14.1086	-377.054	0	0
14.1208	22	14.1208	13.8	14.1208	-377.004	0	0
14.133	19	14.133	14.76	14.133	-380.964	0	0
14.1453	11	14.1453	15.71	14.1453	-389.914	0	0
14.1575	12	14.1575	16.66	14.1575	-389.864	0	0
14.1697	19	14.1697	17.61	14.1697	-383.814	0	0
14.182	24	14.182	18.56	14.182	-379.764	0	0
14.1942	30	14.1942	19.52	14.1942	-374.724	0	0
14.2064	31	14.2064	20.46	14.2064	-374.664	0	0
14.2187	26	14.2187	21.42	14.2187	-380.624	0	0
14.2309	23	14.2309	22.38	14.2309	-384.584	0	0
14.2432	25	14.2432	23.34	14.2432	-383.544	0	0
14.2554	27	14.2554	24.29	14.2554	-382.494	0	0
14.2676	29	14.2676	25.25	14.2676	-381.454	0	0
14.2799	29	14.2799	26.21	14.2799	-382.414	0	0
14.2921	29	14.2921	27.17	14.2921	-383.374	0	0
14.3043	25	14.3043	28.12	14.3043	-388.324	0	0
14.3166	26	14.3166	29.08	14.3166	-388.284	0	0
14.3288	28	14.3288	30.04	14.3288	-387.244	0	0
14.341	31	14.341	31	14.341	-385.204	0	0
14.3533	31	14.3533	31.96	14.3533	-386.164	0	0
14.3655	32	14.3655	32.92	14.3655	-386.124	0	0
14.3778	28	14.3778	33.03	14.3778	-390.234	0	0
14.39	26	14.39	32.79	14.39	-391.994	0	0
14.4022	23	14.4022	32.55	14.4022	-394.754	0	0
14.4145	23	14.4145	32.31	14.4145	-394.514	0	0
14.4267	24	14.4267	32.07	14.4267	-393.274	0	0
14.4389	31	14.4389	31.84	14.4389	-386.044	0	0
14.4512	33	14.4512	31.6	14.4512	-383.804	0	0
14.4634	36	14.4634	31.36	14.4634	-380.564	0	0
14.4756	34	14.4756	31.12	14.4756	-382.324	0	0
14.4879	36	14.4879	30.89	14.4879	-380.094	0	0
14.5001	37	14.5001	30.65	14.5001	-378.854	0	0
14.5123	40	14.5123	30.41	14.5123	-375.614	0	0
14.5246	41	14.5246	30.18	14.5246	-374.384	0	0
14.5368	45	14.5368	29.94	14.5368	-370.144	0	0
14.5491	46	14.5491	29.7	14.5491	-368.904	0	0
14.5613	50	14.5613	29.47	14.5613	-364.674	0	0
14.5735	47	14.5735	29.24	14.5735	-367.444	0	0
14.5858	47	14.5858	29	14.5858	-367.204	0	0
14.598	45	14.598	28.77	14.598	-368.974	0	0
14.6102	42	14.6102	28.54	14.6102	-371.744	0	0
14.6225	43	14.6225	28.32	14.6225	-370.524	0	0
14.6347	44	14.6347	27.96	14.6347	-369.164	0	0
14.6469	43	14.6469	27.76	14.6469	-369.964	0	0
14.6592	39	14.6592	27.58	14.6592	-373.784	0	0
14.6714	35	14.6714	27.43	14.6714	-377.634	0	0
14.6837	34	14.6837	27.33	14.6837	-378.534	0	0
14.6959	32	14.6959	27.29	14.6959	-380.494	0	0
14.7081	32	14.7081	27.33	14.7081	-380.534	0	0
14.7204	30	14.7204	27.49	14.7204	-382.694	0	0
14.7326	33	14.7326	27.8	14.7326	-380.004	0	0
14.7448	35	14.7448	28.3	14.7448	-378.504	0	0
14.7571	39	14.7571	29.02	14.7571	-375.224	0	0
14.7693	42	14.7693	29.99	14.7693	-373.194	0	0
14.7815	43	14.7815	31.24	14.7815	-373.444	0	0
14.7938	44	14.7938	32.78	14.7938	-373.984	0	0
14.806	42	14.806	34.59	14.806	-377.794	0	0
14.8182	38	14.8182	36.64	14.8182	-383.844	0	0
14.8305	36	14.8305	38.88	14.8305	-388.084	0	0
14.8427	33	14.8427	41.19	14.8427	-393.394	0	0
14.855	32	14.855	43.48	14.855	-396.684	0	0
14.8672	35	14.8672	45.61	14.8672	-395.814	0	0
14.8794	37	14.8794	47.45	14.8794	-395.654	0	0
14.8917	37	14.8917	48.86	14.8917	-397.064	0	0
14.9039	38	14.9039	49.74	14.9039	-396.944	0	0
14.9161	39	14.9161	50.02	14.9161	-396.224	0	0
14.9284	39	14.9284	49.65	14.9284	-395.854	0	0
14.9406	39	14.9406	48.66	14.9406	-394.864	0	0
14.9528	40	14.9528	47.1	14.9528	-392.304	0	0
14.9651	38	14.9651	45.09	14.9651	-392.294	0	0
14.9773	37	14.9773	42.74	14.9773	-390.944	0	0
14.9896	36	14.9896	40.18	14.9896	-389.384	0	0
15.0018	35	15.0018	37.55	15.0018	-387.754	0	0
15.014	32	15.014	34.96	15.014	-388.164	0	0
15.0263	26	15.0263	32.52	15.0263	-391.724	0	0
15.0385	26	15.0385	30.27	15.0385	-389.474	0	0
15.0507	21	15.0507	28.28	15.0507	-392.484	0	0
15.063	21	15.063	26.56	15.063	-390.764	0	0
15.0752	26	15.0752	25.11	15.0752	-384.314	0	0
15.0874	27	15.0874	23.74	15.0874	-381.944	0	0
15.0997	28	15.0997	22.55	15.0997	-379.754	0	0
15.1119	23	15.1119	21.56	15.1119	-383.764	0	0
15.1241	24	15.1241	20.74	15.1241	-381.944	0	0
15.1364	22	15.1364	20.04	15.1364	-383.244	0	0
15.1486	20	15.1486	19.45	15.1486	-384.654	0	0
15.1609	17	15.1609	18.93	15.1609	-387.134	0	0
15.1731	17	15.1731	18.48	15.1731	-386.684	0	0
15.1853	17	15.1853	18.06	15.1853	-386.264	0	0
15.1976	18	15.1976	17.65	15.1976	-384.854	0	0
15.2098	19	15.2098	17.25	15.2098	-383.454	0	0
15.222	17	15.222	16.84	15.222	-385.044	0	0
15.2343	14	15.2343	16.42	15.2343	-387.624	0	0
15.2465	12	15.2465	15.98	15.2465	-389.184	0	0
15.2587	14	15.2587	15.53	15.2587	-386.734	0	0
15.271	18	15.271	15.09	15.271	-382.294	0	0
15.2832	21	15.2832	14.69	15.2832	-378.894	0	0
15.2955	19	15.2955	14.36	15.2955	-380.564	0	0
15.3077	14	15.3077	14.15	15.3077	-385.354	0	0
15.3199	11	15.3199	14.14	15.3199	-388.344	0	0
15.3322	11	15.3322	14.39	15.3322	-388.594	0	0
15.3444	10	15.3444	15	15.3444	-390.204	0	0
15.3566	13	15.3566	16.07	15.3566	-388.274	0	0
15.3689	8	15.3689	17.68	15.3689	-394.884	0	0
15.3811	13	15.3811	19.93	15.3811	-392.134	0	0
15.3933	15	15.3933	22.96	15.3933	-393.164	0	0
15.4056	22	15.4056	26.79	15.4056	-389.994	0	0
15.4178	29	15.4178	31.4	15.4178	-387.604	0	0
15.43	38	15.43	36.76	15.43	-383.964	0	0
15.4423	51	15.4423	42.78	15.4423	-376.984	0	0
15.4545	60	15.4545	49.3	15.4545	-374.504	0	0
15.4668	71	15.4668	56.08	15.4668	-370.284	0	0
15.479	76	15.479	62.87	15.479	-372.074	0	0
15.4912	83	15.4912	69.33	15.4912	-371.534	0	0
15.5035	89	15.5035	75.16	15.5035	-371.364	0	0
15.5157	90	15.5157	80.03	15.5157	-375.234	0	0
15.5279	93	15.5279	83.68	15.5279	-375.884	0	0
15.5402	90	15.5402	85.89	15.5402	-381.094	0	0
15.5524	82	15.5524	86.54	15.5524	-389.744	0	0
15.5646	74	15.5646	85.61	15.5646	-396.814	0	0
15.5769	67	15.5769	83.16	15.5769	-401.364	0	0
15.5891	68	15.5891	79.33	15.5891	-396.534	0	0
15.6014	62	15.6014	74.32	15.6014	-397.524	0	0
15.6136	61	15.6136	68.39	15.6136	-392.594	0	0
15.6258	57	15.6258	61.83	15.6258	-390.034	0	0
15.6381	58	15.6381	54.9	15.6381	-382.104	0	0
15.6503	53	15.6503	47.89	15.6503	-380.094	0	0
15.6625	50	15.6625	41.02	15.6625	-376.224	0	0
15.6748	42	15.6748	34.5	15.6748	-377.704	0	0
15.687	37	15.687	28.48	15.687	-376.684	0	0
15.6992	30	15.6992	23.06	15.6992	-378.264	0	0
15.7115	24	15.7115	18.31	15.7115	-379.514	0	0
15.7237	17	15.7237	14.26	15.7237	-382.464	0	0
15.7359	9	15.7359	10.9	15.7359	-387.104	0	0
15.7482	7	15.7482	8.21	15.7482	-386.414	0	0
15.7604	3	15.7604	6.13	15.7604	-388.334	0	0
15.7727	1	15.7727	4.59	15.7727	-388.794	0	0
15.7849	1	15.7849	3.54	15.7849	-387.744	0	0
15.7971	1	15.7971	2.88	15.7971	-387.084	0	0
15.8094	1	15.8094	2.54	15.8094	-386.744	0	0
15.8216	1	15.8216	2.43	15.8216	-386.634	0	0
15.8338	6	15.8338	2.46	15.8338	-381.664	0	0
15.8461	2	15.8461	2.6	15.8461	-385.804	0	0
15.8583	1	15.8583	2.75	15.8583	-386.954	0	0
15.8705	1	15.8705	2.81	15.8705	-387.014	0	0
15.8828	1	15.8828	2.74	15.8828	-386.944	0	0
15.895	1	15.895	2.49	15.895	-386.694	0	0
15.9073	1	15.9073	2.06	15.9073	-386.264	0	0
15.9195	1	15.9195	1.43	15.9195	-385.634	0	0
15.9317	1	15.9317	0.62	15.9317	-384.824	0	0
15.944	1	15.944	-0.32	15.944	-383.884	0	0
15.9562	1	15.9562	-1.27	15.9562	-382.934	0	0
15.9684	1	15.9684	-2.08	15.9684	-382.124	0	0
15.9807	1	15.9807	-2.91	15.9807	-381.294	0	0
15.9929	1	15.9929	-3.71	15.9929	-380.494	0	0

## Sheet: Supplementary Figure 7d
Supplementary Figure 7d
zeta-N2 99 GPa
powder data provided by Gregoryanz from his 2007 paper
2theta	Observed Intensity	2theta	Calculated Intensity	2theta	Difference between observed and calculated intensity	2theta position of tick marks
9.0061	1	9.0061	5	9.0061	-379.531	10.141	-85.754
9.0184	1	9.0184	5	9.0184	-379.531	10.2316	-85.754
9.0306	1	9.0306	5	9.0306	-379.531	10.7769	-85.754
9.0429	1	9.0429	5	9.0429	-379.531	10.9443	-85.754
9.0551	1	9.0551	5	9.0551	-379.531	11.0073	-85.754
9.0673	1	9.0673	5	9.0673	-379.531	11.3326	-85.754
9.0796	1	9.0796	5	9.0796	-379.531	11.463	-85.754
9.0918	1	9.0918	4.93	9.0918	-379.461	11.7653	-85.754
9.104	5	9.104	4.85	9.104	-375.382	11.824	-85.754
9.1163	7	9.1163	4.77	9.1163	-373.301	11.8801	-85.754
9.1285	14	9.1285	4.69	9.1285	-366.221	12.5065	-85.754
9.1407	18	9.1407	4.62	9.1407	-362.151	12.7503	-85.754
9.153	19	9.153	4.54	9.153	-361.072	12.7583	-85.754
9.1652	24	9.1652	4.46	9.1652	-355.991	12.9896	-85.754
9.1775	19	9.1775	4.38	9.1775	-360.911	13.1193	-85.754
9.1897	12	9.1897	4.31	9.1897	-367.841	13.459	-85.754
9.2019	5	9.2019	4.23	9.2019	-374.762	13.761	-85.754
9.2142	1	9.2142	4.15	9.2142	-378.681	13.9058	-85.754
9.2264	2	9.2264	4.07	9.2264	-377.601	15.06	-85.754
9.2386	1	9.2386	4	9.2386	-378.531	15.2096	-85.754
9.2509	1	9.2509	3.92	9.2509	-378.452	15.2366	-85.754
9.2631	6	9.2631	3.84	9.2631	-373.371	15.4014	-85.754
9.2753	5	9.2753	3.76	9.2753	-374.291	15.4679	-85.754
9.2876	6	9.2876	3.69	9.2876	-373.221	15.6369	-85.754
9.2998	2	9.2998	3.61	9.2998	-377.141	15.714	-85.754
9.312	1	9.312	3.53	9.312	-378.061	15.7552	-85.754
9.3243	1	9.3243	3.45	9.3243	-377.982	15.7876	-85.754
9.3365	1	9.3365	3.38	9.3365	-377.911	15.7977	-85.754
9.3488	1	9.3488	3.3	9.3488	-377.831	0	0
9.361	1	9.361	3.22	9.361	-377.752	0	0
9.3732	1	9.3732	3.14	9.3732	-377.672	0	0
9.3855	1	9.3855	3.07	9.3855	-377.601	0	0
9.3977	1	9.3977	2.99	9.3977	-377.521	0	0
9.4099	2	9.4099	2.91	9.4099	-376.442	0	0
9.4222	1	9.4222	2.83	9.4222	-377.361	0	0
9.4344	1	9.4344	2.76	9.4344	-377.291	0	0
9.4466	3	9.4466	2.68	9.4466	-375.211	0	0
9.4589	9	9.4589	2.6	9.4589	-369.132	0	0
9.4711	14	9.4711	2.52	9.4711	-364.051	0	0
9.4834	10	9.4834	2.45	9.4834	-367.982	0	0
9.4956	11	9.4956	2.37	9.4956	-366.901	0	0
9.5078	9	9.5078	2.29	9.5078	-368.822	0	0
9.5201	10	9.5201	2.22	9.5201	-367.752	0	0
9.5323	12	9.5323	2.14	9.5323	-365.672	0	0
9.5445	10	9.5445	2.06	9.5445	-367.591	0	0
9.5568	13	9.5568	1.98	9.5568	-364.512	0	0
9.569	12	9.569	1.91	9.569	-365.442	0	0
9.5812	11	9.5812	1.83	9.5812	-366.361	0	0
9.5935	11	9.5935	1.75	9.5935	-366.281	0	0
9.6057	10	9.6057	1.67	9.6057	-367.202	0	0
9.6179	11	9.6179	1.6	9.6179	-366.132	0	0
9.6302	13	9.6302	1.52	9.6302	-364.051	0	0
9.6424	15	9.6424	1.44	9.6424	-361.971	0	0
9.6547	15	9.6547	1.36	9.6547	-361.891	0	0
9.6669	13	9.6669	1.29	9.6669	-363.822	0	0
9.6791	13	9.6791	1.21	9.6791	-363.741	0	0
9.6914	9	9.6914	1.13	9.6914	-367.661	0	0
9.7036	6	9.7036	1.05	9.7036	-370.581	0	0
9.7158	7	9.7158	0.98	9.7158	-369.512	0	0
9.7281	1	9.7281	0.9	9.7281	-375.431	0	0
9.7403	1	9.7403	0.82	9.7403	-375.351	0	0
9.7525	1	9.7525	0.74	9.7525	-375.271	0	0
9.7648	1	9.7648	0.67	9.7648	-375.202	0	0
9.777	5	9.777	0.59	9.777	-371.121	0	0
9.7893	2	9.7893	0.51	9.7893	-374.041	0	0
9.8015	1	9.8015	0.43	9.8015	-374.961	0	0
9.8137	1	9.8137	0.36	9.8137	-374.891	0	0
9.826	1	9.826	0.28	9.826	-374.811	0	0
9.8382	1	9.8382	0.2	9.8382	-374.732	0	0
9.8504	1	9.8504	0.13	9.8504	-374.661	0	0
9.8627	1	9.8627	0.05	9.8627	-374.581	0	0
9.8749	3	9.8749	-0.01	9.8749	-372.521	0	0
9.8871	6	9.8871	-0.07	9.8871	-369.461	0	0
9.8994	3	9.8994	-0.12	9.8994	-372.411	0	0
9.9116	3	9.9116	-0.13	9.9116	-372.401	0	0
9.9238	3	9.9238	-0.08	9.9238	-372.452	0	0
9.9361	1	9.9361	0.07	9.9361	-374.601	0	0
9.9483	1	9.9483	0.41	9.9483	-374.942	0	0
9.9606	1	9.9606	1.11	9.9606	-375.641	0	0
9.9728	1	9.9728	2.29	9.9728	-376.822	0	0
9.985	3	9.985	4.22	9.985	-376.752	0	0
9.9973	10	9.9973	7.29	9.9973	-372.822	0	0
10.0095	13	10.0095	12.04	10.0095	-374.572	0	0
10.0217	15	10.0217	19.18	10.0217	-379.711	0	0
10.034	22	10.034	29.62	10.034	-383.151	0	0
10.0462	29	10.0462	44.43	10.0462	-390.961	0	0
10.0584	45	10.0584	64.84	10.0584	-395.371	0	0
10.0707	70	10.0707	92.12	10.0707	-397.651	0	0
10.0829	98	10.0829	127.49	10.0829	-405.021	0	0
10.0952	135	10.0952	171.89	10.0952	-412.422	0	0
10.1074	186	10.1074	225.84	10.1074	-415.371	0	0
10.1196	240	10.1196	289.17	10.1196	-424.702	0	0
10.1319	313	10.1319	360.87	10.1319	-423.401	0	0
10.1441	385	10.1441	438.92	10.1441	-429.452	0	0
10.1563	469	10.1563	520.35	10.1563	-426.881	0	0
10.1686	551	10.1686	601.28	10.1686	-425.812	0	0
10.1808	626	10.1808	677.23	10.1808	-426.761	0	0
10.193	698	10.193	743.5	10.193	-421.031	0	0
10.2053	759	10.2053	795.62	10.2053	-412.151	0	0
10.2175	803	10.2175	829.89	10.2175	-402.422	0	0
10.2297	844	10.2297	843.76	10.2297	-375.291	0	0
10.242	852	10.242	836.2	10.242	-359.732	0	0
10.2542	835	10.2542	807.76	10.2542	-348.291	0	0
10.2665	798	10.2665	760.58	10.2665	-338.112	0	0
10.2787	738	10.2787	698.06	10.2787	-335.591	0	0
10.2909	675	10.2909	624.48	10.2909	-325.011	0	0
10.3032	601	10.3032	544.54	10.3032	-319.071	0	0
10.3154	525	10.3154	462.82	10.3154	-313.351	0	0
10.3276	442	10.3276	383.41	10.3276	-316.942	0	0
10.3399	366	10.3399	309.58	10.3399	-319.111	0	0
10.3521	297	10.3521	243.63	10.3521	-322.161	0	0
10.3643	239	10.3643	186.85	10.3643	-323.382	0	0
10.3766	190	10.3766	139.65	10.3766	-325.181	0	0
10.3888	146	10.3888	101.69	10.3888	-331.221	0	0
10.4011	108	10.4011	72.14	10.4011	-339.672	0	0
10.4133	79	10.4133	49.83	10.4133	-346.362	0	0
10.4255	50	10.4255	33.5	10.4255	-359.031	0	0
10.4378	33	10.4378	21.9	10.4378	-364.431	0	0
10.45	19	10.45	13.9	10.45	-370.431	0	0
10.4622	5	10.4622	8.56	10.4622	-379.091	0	0
10.4745	2	10.4745	5.13	10.4745	-378.661	0	0
10.4867	1	10.4867	3.03	10.4867	-377.561	0	0
10.4989	1	10.4989	1.88	10.4989	-376.411	0	0
10.5112	2	10.5112	1.47	10.5112	-375.002	0	0
10.5234	1	10.5234	1.66	10.5234	-376.192	0	0
10.5356	2	10.5356	2.43	10.5356	-375.961	0	0
10.5479	3	10.5479	3.89	10.5479	-376.422	0	0
10.5601	3	10.5601	6.24	10.5601	-378.771	0	0
10.5724	8	10.5724	9.79	10.5724	-377.322	0	0
10.5846	12	10.5846	14.93	10.5846	-378.461	0	0
10.5968	18	10.5968	22.12	10.5968	-379.651	0	0
10.6091	27	10.6091	31.91	10.6091	-380.442	0	0
10.6213	39	10.6213	44.81	10.6213	-381.341	0	0
10.6335	53	10.6335	61.3	10.6335	-383.831	0	0
10.6458	75	10.6458	81.73	10.6458	-382.262	0	0
10.658	97	10.658	106.22	10.658	-384.752	0	0
10.6702	126	10.6702	134.56	10.6702	-384.091	0	0
10.6825	159	10.6825	166.21	10.6825	-382.742	0	0
10.6947	194	10.6947	200.2	10.6947	-381.732	0	0
10.707	238	10.707	235.2	10.707	-372.732	0	0
10.7192	273	10.7192	269.58	10.7192	-372.111	0	0
10.7314	308	10.7314	301.56	10.7314	-369.091	0	0
10.7437	338	10.7437	329.4	10.7437	-366.931	0	0
10.7559	362	10.7559	351.59	10.7559	-365.121	0	0
10.7681	381	10.7681	367.05	10.7681	-361.581	0	0
10.7804	384	10.7804	375.3	10.7804	-366.831	0	0
10.7926	382	10.7926	376.48	10.7926	-370.012	0	0
10.8048	373	10.8048	371.38	10.8048	-373.911	0	0
10.8171	361	10.8171	361.29	10.8171	-375.822	0	0
10.8293	346	10.8293	347.84	10.8293	-377.371	0	0
10.8415	332	10.8415	332.72	10.8415	-376.252	0	0
10.8538	322	10.8538	317.49	10.8538	-371.021	0	0
10.866	316	10.866	303.3	10.866	-362.831	0	0
10.8783	312	10.8783	290.86	10.8783	-354.391	0	0
10.8905	311	10.8905	280.29	10.8905	-344.822	0	0
10.9027	306	10.9027	271.21	10.9027	-340.741	0	0
10.915	296	10.915	262.9	10.915	-342.431	0	0
10.9272	283	10.9272	254.4	10.9272	-346.931	0	0
10.9394	264	10.9394	244.78	10.9394	-356.311	0	0
10.9517	247	10.9517	233.25	10.9517	-361.781	0	0
10.9639	222	10.9639	219.36	10.9639	-372.891	0	0
10.9761	201	10.9761	203	10.9761	-377.531	0	0
10.9884	181	10.9884	184.41	10.9884	-378.942	0	0
11.0006	162	11.0006	164.18	11.0006	-377.711	0	0
11.0129	142	11.0129	143.07	11.0129	-376.601	0	0
11.0251	120	11.0251	121.93	11.0251	-377.461	0	0
11.0373	95	11.0373	101.58	11.0373	-382.112	0	0
11.0496	76	11.0496	82.75	11.0496	-382.281	0	0
11.0618	58	11.0618	65.94	11.0618	-383.471	0	0
11.074	45	11.074	51.5	11.074	-382.031	0	0
11.0863	36	11.0863	39.55	11.0863	-379.081	0	0
11.0985	24	11.0985	30.07	11.0985	-381.601	0	0
11.1107	13	11.1107	22.91	11.1107	-385.442	0	0
11.123	3	11.123	17.89	11.123	-390.422	0	0
11.1352	1	11.1352	14.79	11.1352	-389.322	0	0
11.1474	1	11.1474	13.45	11.1474	-387.982	0	0
11.1597	1	11.1597	13.54	11.1597	-388.072	0	0
11.1719	2	11.1719	15.2	11.1719	-388.732	0	0
11.1842	11	11.1842	18.41	11.1842	-382.942	0	0
11.1964	15	11.1964	23.25	11.1964	-383.781	0	0
11.2086	25	11.2086	29.83	11.2086	-380.361	0	0
11.2209	35	11.2209	38.3	11.2209	-378.831	0	0
11.2331	45	11.2331	48.85	11.2331	-379.382	0	0
11.2453	61	11.2453	61.71	11.2453	-376.241	0	0
11.2576	77	11.2576	77.16	11.2576	-375.692	0	0
11.2698	101	11.2698	95.56	11.2698	-370.091	0	0
11.282	125	11.282	117.31	11.282	-367.841	0	0
11.2943	154	11.2943	142.93	11.2943	-364.461	0	0
11.3065	188	11.3065	172.96	11.3065	-360.492	0	0
11.3188	221	11.3188	207.9	11.3188	-362.431	0	0
11.331	257	11.331	248.14	11.331	-366.672	0	0
11.3432	301	11.3432	293.82	11.3432	-368.351	0	0
11.3555	351	11.3555	344.61	11.3555	-369.141	0	0
11.3677	408	11.3677	399.65	11.3677	-367.181	0	0
11.3799	476	11.3799	457.37	11.3799	-356.901	0	0
11.3922	536	11.3922	515.57	11.3922	-355.101	0	0
11.4044	603	11.4044	571.39	11.4044	-343.922	0	0
11.4166	650	11.4166	621.6	11.4166	-347.131	0	0
11.4289	695	11.4289	662.85	11.4289	-343.381	0	0
11.4411	718	11.4411	692.07	11.4411	-349.601	0	0
11.4533	726	11.4533	706.79	11.4533	-356.321	0	0
11.4656	715	11.4656	705.54	11.4656	-366.071	0	0
11.4778	692	11.4778	687.97	11.4778	-371.501	0	0
11.4901	650	11.4901	655.01	11.4901	-380.541	0	0
11.5023	607	11.5023	608.7	11.5023	-377.232	0	0
11.5145	544	11.5145	552.05	11.5145	-383.581	0	0
11.5268	486	11.5268	488.6	11.5268	-378.132	0	0
11.539	418	11.539	422.14	11.539	-379.672	0	0
11.5512	352	11.5512	356.29	11.5512	-379.822	0	0
11.5635	289	11.5635	294.19	11.5635	-380.721	0	0
11.5757	236	11.5757	238.39	11.5757	-377.922	0	0
11.5879	190	11.5879	190.62	11.5879	-376.151	0	0
11.6002	150	11.6002	151.93	11.6002	-377.461	0	0
11.6124	119	11.6124	122.71	11.6124	-379.241	0	0
11.6247	96	11.6247	102.83	11.6247	-382.362	0	0
11.6369	79	11.6369	91.81	11.6369	-388.341	0	0
11.6491	68	11.6491	88.97	11.6491	-396.502	0	0
11.6614	71	11.6614	93.51	11.6614	-398.041	0	0
11.6736	78	11.6736	104.65	11.6736	-402.181	0	0
11.6858	98	11.6858	121.66	11.6858	-399.192	0	0
11.6981	127	11.6981	143.89	11.6981	-392.422	0	0
11.7103	163	11.7103	170.8	11.7103	-383.331	0	0
11.7225	210	11.7225	201.91	11.7225	-367.442	0	0
11.7348	255	11.7348	236.84	11.7348	-357.371	0	0
11.747	306	11.747	275.18	11.747	-344.711	0	0
11.7592	358	11.7592	316.44	11.7592	-333.971	0	0
11.7715	409	11.7715	359.96	11.7715	-326.491	0	0
11.7837	461	11.7837	404.85	11.7837	-319.382	0	0
11.796	502	11.796	449.83	11.796	-323.361	0	0
11.8082	536	11.8082	493.29	11.8082	-332.822	0	0
11.8204	562	11.8204	533.27	11.8204	-346.802	0	0
11.8327	573	11.8327	567.56	11.8327	-370.091	0	0
11.8449	583	11.8449	593.93	11.8449	-386.461	0	0
11.8571	578	11.8571	610.34	11.8571	-407.872	0	0
11.8694	568	11.8694	615.17	11.8694	-422.701	0	0
11.8816	548	11.8816	607.51	11.8816	-435.041	0	0
11.8938	515	11.8938	587.24	11.8938	-447.771	0	0
11.9061	481	11.9061	555.18	11.9061	-449.711	0	0
11.9183	442	11.9183	512.97	11.9183	-446.501	0	0
11.9306	404	11.9306	462.91	11.9306	-434.442	0	0
11.9428	362	11.9428	407.77	11.9428	-421.301	0	0
11.955	319	11.955	350.41	11.955	-406.942	0	0
11.9673	281	11.9673	293.59	11.9673	-388.121	0	0
11.9795	241	11.9795	239.68	11.9795	-374.211	0	0
11.9917	206	11.9917	190.47	11.9917	-360.002	0	0
12.004	171	12.004	147.18	12.004	-351.711	0	0
12.0162	143	12.0162	110.37	12.0162	-342.901	0	0
12.0284	114	12.0284	80.1	12.0284	-341.632	0	0
12.0407	90	12.0407	55.98	12.0407	-341.512	0	0
12.0529	69	12.0529	37.34	12.0529	-343.871	0	0
12.0651	55	12.0651	23.35	12.0651	-343.882	0	0
12.0774	46	12.0774	13.15	12.0774	-342.681	0	0
12.0896	37	12.0896	5.92	12.0896	-344.452	0	0
12.1019	31	12.1019	0.92	12.1019	-345.452	0	0
12.1141	27	12.1141	-2.45	12.1141	-346.081	0	0
12.1263	22	12.1263	-4.68	12.1263	-348.851	0	0
12.1386	15	12.1386	-6.13	12.1386	-354.401	0	0
12.1508	10	12.1508	-7.07	12.1508	-358.461	0	0
12.163	9	12.163	-7.67	12.163	-358.861	0	0
12.1753	5	12.1753	-8.06	12.1753	-362.471	0	0
12.1875	1	12.1875	-8.32	12.1875	-366.211	0	0
12.1997	1	12.1997	-8.48	12.1997	-366.051	0	0
12.212	1	12.212	-8.39	12.212	-366.141	0	0
12.2242	1	12.2242	-8.17	12.2242	-366.361	0	0
12.2365	1	12.2365	-7.81	12.2365	-366.721	0	0
12.2487	1	12.2487	-7.24	12.2487	-367.291	0	0
12.2609	12	12.2609	-6.36	12.2609	-357.172	0	0
12.2732	18	12.2732	-5	12.2732	-352.531	0	0
12.2854	21	12.2854	-2.96	12.2854	-351.572	0	0
12.2976	28	12.2976	0.07	12.2976	-347.601	0	0
12.3099	26	12.3099	4.44	12.3099	-353.971	0	0
12.3221	27	12.3221	10.57	12.3221	-359.101	0	0
12.3343	28	12.3343	18.94	12.3343	-366.471	0	0
12.3466	36	12.3466	30.05	12.3466	-369.581	0	0
12.3588	52	12.3588	44.34	12.3588	-367.871	0	0
12.371	72	12.371	62.19	12.371	-365.721	0	0
12.3833	98	12.3833	83.74	12.3833	-361.271	0	0
12.3955	117	12.3955	108.9	12.3955	-367.431	0	0
12.4078	137	12.4078	137.25	12.4078	-375.781	0	0
12.42	153	12.42	167.95	12.42	-390.482	0	0
12.4322	173	12.4322	199.82	12.4322	-402.351	0	0
12.4445	199	12.4445	231.35	12.4445	-407.882	0	0
12.4567	219	12.4567	260.8	12.4567	-417.331	0	0
12.4689	239	12.4689	286.38	12.4689	-422.911	0	0
12.4812	258	12.4812	306.42	12.4812	-423.952	0	0
12.4934	270	12.4934	319.57	12.4934	-425.101	0	0
12.5056	287	12.5056	324.97	12.5056	-413.502	0	0
12.5179	288	12.5179	322.39	12.5179	-409.922	0	0
12.5301	284	12.5301	312.24	12.5301	-403.771	0	0
12.5424	273	12.5424	295.57	12.5424	-398.101	0	0
12.5546	265	12.5546	273.98	12.5546	-384.512	0	0
12.5668	254	12.5668	249.42	12.5668	-370.951	0	0
12.5791	243	12.5791	224.04	12.5791	-356.571	0	0
12.5913	234	12.5913	199.93	12.5913	-341.461	0	0
12.6035	228	12.6035	178.97	12.6035	-326.502	0	0
12.6158	222	12.6158	162.63	12.6158	-316.161	0	0
12.628	217	12.628	151.89	12.628	-310.422	0	0
12.6402	213	12.6402	147.16	12.6402	-309.692	0	0
12.6525	204	12.6525	148.26	12.6525	-319.791	0	0
12.6647	200	12.6647	154.5	12.6647	-330.031	0	0
12.6769	198	12.6769	164.72	12.6769	-342.252	0	0
12.6892	196	12.6892	177.44	12.6892	-356.971	0	0
12.7014	196	12.7014	190.97	12.7014	-370.502	0	0
12.7137	190	12.7137	203.62	12.7137	-389.151	0	0
12.7259	188	12.7259	213.82	12.7259	-401.351	0	0
12.7381	182	12.7381	220.29	12.7381	-413.821	0	0
12.7504	179	12.7504	222.15	12.7504	-418.681	0	0
12.7626	176	12.7626	219	12.7626	-418.531	0	0
12.7748	167	12.7748	210.95	12.7748	-419.482	0	0
12.7871	157	12.7871	198.54	12.7871	-417.071	0	0
12.7993	147	12.7993	182.71	12.7993	-411.242	0	0
12.8115	142	12.8115	164.66	12.8115	-398.192	0	0
12.8238	138	12.8238	145.7	12.8238	-383.232	0	0
12.836	132	12.836	127.1	12.836	-370.632	0	0
12.8483	125	12.8483	110.01	12.8483	-360.541	0	0
12.8605	124	12.8605	95.31	12.8605	-346.841	0	0
12.8727	121	12.8727	83.59	12.8727	-338.121	0	0
12.885	115	12.885	75.1	12.885	-335.632	0	0
12.8972	108	12.8972	69.77	12.8972	-337.301	0	0
12.9094	105	12.9094	67.28	12.9094	-337.811	0	0
12.9217	105	12.9217	67.07	12.9217	-337.601	0	0
12.9339	108	12.9339	68.46	12.9339	-335.991	0	0
12.9461	111	12.9461	70.68	12.9461	-335.211	0	0
12.9584	107	12.9584	73	12.9584	-341.531	0	0
12.9706	95	12.9706	74.75	12.9706	-355.281	0	0
12.9828	88	12.9828	75.43	12.9828	-362.961	0	0
12.9951	79	12.9951	74.68	12.9951	-371.211	0	0
13.0073	70	13.0073	72.33	13.0073	-377.862	0	0
13.0196	56	13.0196	68.42	13.0196	-387.951	0	0
13.0318	44	13.0318	63.12	13.0318	-394.651	0	0
13.044	32	13.044	56.74	13.044	-400.271	0	0
13.0563	21	13.0563	49.65	13.0563	-404.181	0	0
13.0685	15	13.0685	42.26	13.0685	-402.791	0	0
13.0807	10	13.0807	34.93	13.0807	-400.461	0	0
13.093	6	13.093	28.01	13.093	-397.541	0	0
13.1052	7	13.1052	21.72	13.1052	-390.252	0	0
13.1174	3	13.1174	16.25	13.1174	-388.781	0	0
13.1297	1	13.1297	11.67	13.1297	-386.202	0	0
13.1419	1	13.1419	8.03	13.1419	-382.561	0	0
13.1542	1	13.1542	5.31	13.1542	-379.841	0	0
13.1664	2	13.1664	3.53	13.1664	-377.061	0	0
13.1786	2	13.1786	2.71	13.1786	-376.241	0	0
13.1909	1	13.1909	2.98	13.1909	-377.512	0	0
13.2031	1	13.2031	4.58	13.2031	-379.111	0	0
13.2153	1	13.2153	7.92	13.2153	-382.452	0	0
13.2276	6	13.2276	13.65	13.2276	-383.181	0	0
13.2398	15	13.2398	22.68	13.2398	-383.211	0	0
13.252	29	13.252	36.22	13.252	-382.752	0	0
13.2643	47	13.2643	55.8	13.2643	-384.331	0	0
13.2765	69	13.2765	83.21	13.2765	-389.741	0	0
13.2887	101	13.2887	120.44	13.2887	-394.971	0	0
13.301	141	13.301	169.5	13.301	-404.031	0	0
13.3132	196	13.3132	232.18	13.3132	-411.711	0	0
13.3255	266	13.3255	309.77	13.3255	-419.301	0	0
13.3377	355	13.3377	402.75	13.3377	-423.281	0	0
13.3499	468	13.3499	510.42	13.3499	-417.952	0	0
13.3622	608	13.3622	630.65	13.3622	-398.182	0	0
13.3744	758	13.3744	759.75	13.3744	-377.281	0	0
13.3866	931	13.3866	892.5	13.3866	-337.031	0	0
13.3989	1109	13.3989	1022.38	13.3989	-288.911	0	0
13.4111	1271	13.4111	1142.11	13.4111	-246.641	0	0
13.4233	1411	13.4233	1244.23	13.4233	-208.761	0	0
13.4356	1501	13.4356	1321.92	13.4356	-196.452	0	0
13.4478	1537	13.4478	1369.68	13.4478	-208.212	0	0
13.4601	1518	13.4601	1384.04	13.4601	-241.572	0	0
13.4723	1442	13.4723	1363.95	13.4723	-297.481	0	0
13.4845	1321	13.4845	1310.92	13.4845	-365.452	0	0
13.4968	1169	13.4968	1228.83	13.4968	-435.361	0	0
13.509	1011	13.509	1123.47	13.509	-488.001	0	0
13.5212	866	13.5212	1001.9	13.5212	-511.432	0	0
13.5335	735	13.5335	871.63	13.5335	-512.162	0	0
13.5457	621	13.5457	739.94	13.5457	-494.471	0	0
13.5579	518	13.5579	613.21	13.5579	-470.742	0	0
13.5702	437	13.5702	496.54	13.5702	-435.072	0	0
13.5824	372	13.5824	393.46	13.5824	-396.991	0	0
13.5946	325	13.5946	305.96	13.5946	-356.491	0	0
13.6069	292	13.6069	234.66	13.6069	-318.192	0	0
13.6191	256	13.6191	179.01	13.6191	-298.541	0	0
13.6314	227	13.6314	137.68	13.6314	-286.211	0	0
13.6436	198	13.6436	108.83	13.6436	-286.362	0	0
13.6558	178	13.6558	90.34	13.6558	-287.871	0	0
13.6681	161	13.6681	80.1	13.6681	-294.632	0	0
13.6803	148	13.6803	76.05	13.6803	-303.581	0	0
13.6925	137	13.6925	76.36	13.6925	-314.891	0	0
13.7048	126	13.7048	79.38	13.7048	-328.911	0	0
13.717	111	13.717	83.74	13.717	-348.271	0	0
13.7292	97	13.7292	88.32	13.7292	-366.851	0	0
13.7415	86	13.7415	92.25	13.7415	-381.781	0	0
13.7537	79	13.7537	94.93	13.7537	-391.461	0	0
13.766	73	13.766	95.98	13.766	-398.512	0	0
13.7782	71	13.7782	95.27	13.7782	-399.801	0	0
13.7904	65	13.7904	92.86	13.7904	-403.391	0	0
13.8027	59	13.8027	88.96	13.8027	-405.491	0	0
13.8149	52	13.8149	83.9	13.8149	-407.431	0	0
13.8271	49	13.8271	78.06	13.8271	-404.591	0	0
13.8394	44	13.8394	71.81	13.8394	-403.341	0	0
13.8516	41	13.8516	65.48	13.8516	-400.012	0	0
13.8638	35	13.8638	59.32	13.8638	-399.851	0	0
13.8761	30	13.8761	53.5	13.8761	-399.031	0	0
13.8883	32	13.8883	48.11	13.8883	-391.641	0	0
13.9005	29	13.9005	43.16	13.9005	-389.692	0	0
13.9128	28	13.9128	38.61	13.9128	-386.141	0	0
13.925	24	13.925	34.42	13.925	-385.951	0	0
13.9373	11	13.9373	30.53	13.9373	-395.061	0	0
13.9495	1	13.9495	26.89	13.9495	-401.422	0	0
13.9617	1	13.9617	23.48	13.9617	-398.012	0	0
13.974	1	13.974	20.31	13.974	-394.841	0	0
13.9862	1	13.9862	17.38	13.9862	-391.911	0	0
13.9984	1	13.9984	14.74	13.9984	-389.271	0	0
14.0107	4	14.0107	12.51	14.0107	-384.041	0	0
14.0229	8	14.0229	10.59	14.0229	-378.121	0	0
14.0351	8	14.0351	8.99	14.0351	-376.521	0	0
14.0474	8	14.0474	7.71	14.0474	-375.241	0	0
14.0596	7	14.0596	6.71	14.0596	-375.241	0	0
14.0719	10	14.0719	5.97	14.0719	-371.502	0	0
14.0841	9	14.0841	5.46	14.0841	-371.991	0	0
14.0963	13	14.0963	5.13	14.0963	-367.661	0	0
14.1086	16	14.1086	4.96	14.1086	-364.491	0	0
14.1208	17	14.1208	4.9	14.1208	-363.431	0	0
14.133	15	14.133	4.92	14.133	-365.452	0	0
14.1453	15	14.1453	5.01	14.1453	-365.541	0	0
14.1575	16	14.1575	5.14	14.1575	-364.672	0	0
14.1697	20	14.1697	5.3	14.1697	-360.831	0	0
14.182	24	14.182	5.48	14.182	-357.012	0	0
14.1942	28	14.1942	5.67	14.1942	-353.202	0	0
14.2064	30	14.2064	5.87	14.2064	-351.401	0	0
14.2187	25	14.2187	6.08	14.2187	-356.611	0	0
14.2309	25	14.2309	6.28	14.2309	-356.811	0	0
14.2432	24	14.2432	6.49	14.2432	-358.021	0	0
14.2554	24	14.2554	6.7	14.2554	-358.232	0	0
14.2676	23	14.2676	6.91	14.2676	-359.442	0	0
14.2799	25	14.2799	7.12	14.2799	-357.651	0	0
14.2921	28	14.2921	7.33	14.2921	-354.861	0	0
14.3043	28	14.3043	7.54	14.3043	-355.072	0	0
14.3166	27	14.3166	7.75	14.3166	-356.281	0	0
14.3288	28	14.3288	7.96	14.3288	-355.491	0	0
14.341	29	14.341	8.18	14.341	-354.711	0	0
14.3533	32	14.3533	8.39	14.3533	-351.922	0	0
14.3655	29	14.3655	8.6	14.3655	-355.132	0	0
14.3778	27	14.3778	8.81	14.3778	-357.341	0	0
14.39	24	14.39	9.02	14.39	-360.551	0	0
14.4022	24	14.4022	9.23	14.4022	-360.762	0	0
14.4145	21	14.4145	9.44	14.4145	-363.971	0	0
14.4267	23	14.4267	9.65	14.4267	-362.181	0	0
14.4389	26	14.4389	9.86	14.4389	-359.391	0	0
14.4512	32	14.4512	10.07	14.4512	-353.601	0	0
14.4634	29	14.4634	10.28	14.4634	-356.811	0	0
14.4756	26	14.4756	10.49	14.4756	-360.021	0	0
14.4879	26	14.4879	10.7	14.4879	-360.232	0	0
14.5001	28	14.5001	10.91	14.5001	-358.442	0	0
14.5123	31	14.5123	11.12	14.5123	-355.651	0	0
14.5246	34	14.5246	11.34	14.5246	-352.871	0	0
14.5368	35	14.5368	11.55	14.5368	-352.081	0	0
14.5491	34	14.5491	11.76	14.5491	-353.291	0	0
14.5613	33	14.5613	11.97	14.5613	-354.502	0	0
14.5735	33	14.5735	12.18	14.5735	-354.711	0	0
14.5858	36	14.5858	12.39	14.5858	-351.922	0	0
14.598	39	14.598	12.6	14.598	-349.132	0	0
14.6102	37	14.6102	12.81	14.6102	-351.341	0	0
14.6225	39	14.6225	13.02	14.6225	-349.551	0	0
14.6347	32	14.6347	13.23	14.6347	-356.762	0	0
14.6469	26	14.6469	13.49	14.6469	-363.021	0	0
14.6592	23	14.6592	13.75	14.6592	-366.281	0	0
14.6714	21	14.6714	14.01	14.6714	-368.541	0	0
14.6837	17	14.6837	14.26	14.6837	-372.791	0	0
14.6959	14	14.6959	14.52	14.6959	-376.051	0	0
14.7081	10	14.7081	14.78	14.7081	-380.311	0	0
14.7204	9	14.7204	15.04	14.7204	-381.572	0	0
14.7326	13	14.7326	15.3	14.7326	-377.831	0	0
14.7448	16	14.7448	15.56	14.7448	-375.091	0	0
14.7571	22	14.7571	15.82	14.7571	-369.351	0	0
14.7693	20	14.7693	16.09	14.7693	-371.621	0	0
14.7815	24	14.7815	16.37	14.7815	-367.901	0	0
14.7938	27	14.7938	16.67	14.7938	-365.202	0	0
14.806	31	14.806	16.99	14.806	-361.521	0	0
14.8182	32	14.8182	17.34	14.8182	-360.871	0	0
14.8305	28	14.8305	17.75	14.8305	-365.281	0	0
14.8427	31	14.8427	18.23	14.8427	-362.762	0	0
14.855	30	14.855	18.82	14.855	-364.351	0	0
14.8672	27	14.8672	19.53	14.8672	-368.061	0	0
14.8794	25	14.8794	20.43	14.8794	-370.961	0	0
14.8917	16	14.8917	21.53	14.8917	-381.061	0	0
14.9039	16	14.9039	22.47	14.9039	-382.002	0	0
14.9161	13	14.9161	23.54	14.9161	-386.072	0	0
14.9284	18	14.9284	24.93	14.9284	-382.461	0	0
14.9406	20	14.9406	26.63	14.9406	-382.161	0	0
14.9528	24	14.9528	28.64	14.9528	-380.172	0	0
14.9651	27	14.9651	30.91	14.9651	-379.442	0	0
14.9773	30	14.9773	33.37	14.9773	-378.901	0	0
14.9896	36	14.9896	35.93	14.9896	-375.461	0	0
15.0018	38	15.0018	38.49	15.0018	-376.021	0	0
15.014	43	15.014	40.94	15.014	-373.471	0	0
15.0263	44	15.0263	43.17	15.0263	-374.701	0	0
15.0385	42	15.0385	45.12	15.0385	-378.651	0	0
15.0507	42	15.0507	46.76	15.0507	-380.291	0	0
15.063	39	15.063	48.09	15.063	-384.621	0	0
15.0752	39	15.0752	49.19	15.0752	-385.721	0	0
15.0874	40	15.0874	50.16	15.0874	-385.692	0	0
15.0997	44	15.0997	51.13	15.0997	-382.661	0	0
15.1119	48	15.1119	52.25	15.1119	-379.781	0	0
15.1241	50	15.1241	53.63	15.1241	-379.161	0	0
15.1364	53	15.1364	55.35	15.1364	-377.882	0	0
15.1486	57	15.1486	57.42	15.1486	-375.951	0	0
15.1609	59	15.1609	59.76	15.1609	-376.291	0	0
15.1731	67	15.1731	62.23	15.1731	-370.762	0	0
15.1853	69	15.1853	64.63	15.1853	-371.161	0	0
15.1976	71	15.1976	66.69	15.1976	-371.221	0	0
15.2098	70	15.2098	68.17	15.2098	-373.701	0	0
15.222	64	15.222	68.81	15.222	-380.341	0	0
15.2343	61	15.2343	68.44	15.2343	-382.971	0	0
15.2465	57	15.2465	66.96	15.2465	-385.491	0	0
15.2587	59	15.2587	64.34	15.2587	-380.871	0	0
15.271	54	15.271	60.69	15.271	-382.221	0	0
15.2832	54	15.2832	56.16	15.2832	-377.692	0	0
15.2955	50	15.2955	50.99	15.2955	-376.521	0	0
15.3077	46	15.3077	45.42	15.3077	-374.951	0	0
15.3199	44	15.3199	39.73	15.3199	-371.262	0	0
15.3322	43	15.3322	34.17	15.3322	-366.701	0	0
15.3444	42	15.3444	28.94	15.3444	-362.471	0	0
15.3566	37	15.3566	24.19	15.3566	-362.721	0	0
15.3689	30	15.3689	20.02	15.3689	-365.551	0	0
15.3811	26	15.3811	16.48	15.3811	-366.012	0	0
15.3933	20	15.3933	13.57	15.3933	-369.101	0	0
15.4056	16	15.4056	11.26	15.4056	-370.791	0	0
15.4178	9	15.4178	9.52	15.4178	-376.051	0	0
15.43	6	15.43	8.51	15.43	-378.041	0	0
15.4423	1	15.4423	7.96	15.4423	-382.491	0	0
15.4545	1	15.4545	7.83	15.4545	-382.361	0	0
15.4668	1	15.4668	8.09	15.4668	-382.621	0	0
15.479	1	15.479	8.72	15.479	-383.252	0	0
15.4912	6	15.4912	9.71	15.4912	-379.241	0	0
15.5035	8	15.5035	11.06	15.5035	-378.591	0	0
15.5157	6	15.5157	12.73	15.5157	-382.262	0	0
15.5279	4	15.5279	14.7	15.5279	-386.232	0	0
15.5402	5	15.5402	16.92	15.5402	-387.452	0	0
15.5524	8	15.5524	19.29	15.5524	-386.822	0	0
15.5646	12	15.5646	21.72	15.5646	-385.252	0	0
15.5769	17	15.5769	24.08	15.5769	-382.611	0	0
15.5891	26	15.5891	26.24	15.5891	-375.771	0	0
15.6014	31	15.6014	28.06	15.6014	-372.591	0	0
15.6136	35	15.6136	29.42	15.6136	-369.952	0	0
15.6258	34	15.6258	30.22	15.6258	-371.752	0	0
15.6381	38	15.6381	30.39	15.6381	-367.922	0	0
15.6503	40	15.6503	29.92	15.6503	-365.452	0	0
15.6625	40	15.6625	28.84	15.6625	-364.371	0	0
15.6748	39	15.6748	27.22	15.6748	-363.752	0	0
15.687	35	15.687	25.15	15.687	-365.681	0	0
15.6992	33	15.6992	22.77	15.6992	-365.301	0	0
15.7115	28	15.7115	20.21	15.7115	-367.741	0	0
15.7237	25	15.7237	17.6	15.7237	-368.132	0	0
15.7359	23	15.7359	15.07	15.7359	-367.601	0	0
15.7482	24	15.7482	12.7	15.7482	-364.232	0	0
15.7604	22	15.7604	10.56	15.7604	-364.091	0	0
15.7727	13	15.7727	8.69	15.7727	-371.221	0	0
15.7849	7	15.7849	7.12	15.7849	-375.651	0	0
15.7971	1	15.7971	5.82	15.7971	-380.351	0	0
15.8094	1	15.8094	4.77	15.8094	-379.301	0	0
15.8216	1	15.8216	4.01	15.8216	-378.541	0	0
15.8338	1	15.8338	3.46	15.8338	-377.991	0	0
15.8461	1	15.8461	3.07	15.8461	-377.601	0	0
15.8583	1	15.8583	2.79	15.8583	-377.322	0	0
15.8705	1	15.8705	2.6	15.8705	-377.132	0	0
15.8828	1	15.8828	2.47	15.8828	-377.002	0	0
15.895	1	15.895	2.38	15.895	-376.911	0	0
15.9073	1	15.9073	2.33	15.9073	-376.861	0	0
15.9195	1	15.9195	2.3	15.9195	-376.831	0	0
15.9317	1	15.9317	2.28	15.9317	-376.811	0	0
15.944	1	15.944	2.27	15.944	-376.801	0	0
15.9562	1	15.9562	2.26	15.9562	-376.791	0	0
15.9684	2	15.9684	2.26	15.9684	-375.791	0	0
15.9807	1	15.9807	2.26	15.9807	-376.791	0	0
15.9929	1	15.9929	2.26	15.9929	-376.791	0	0

[truncated: 13 more sheets: Supplementary Figure 7e, Supplementary Figure 8, Supplementary Figure 9, SF9-Path 1, SF9-Path 2, SF9-Path 3, SF9-Path 4, SF9-Path 5, SF9-DOS, Supplementary Figure 10, Supplementary Figure 11, Supplementary Figure 12, Supplementary Figure 13]
